# Supplementary material for: Cannabis consumption is associated with altered steroid metabolism in young men
Source: Commun Med (Lond). 2026 Apr 16;6:224. doi: 10.1038/s43856-026-01469-x (PMC13087242; doi:10.1038/s43856-026-01469-x)
Supplement: Supplementary file 4 — Supplementary Data 1 [file 43856_2026_1469_MOESM4_ESM.xlsx]

## Sheet: SuppData-1
Trivial Name	Formula	CAS Registry Nr.	ChEBI	SMILES	InChI	INCHIKEY	Pubchem CID	IUPAC name
11α-hydroxyetiocholanedione	C19H28O3	32694-33-0	CHEBI_746868	C[C@]12CCC(=O)C[C@H]1CC[C@@H]3[C@@H]2[C@@H](C[C@]4([C@H]3CCC4=O)C)O	InChI=1S/C19H28O3/c1-18-8-7-12(20)9-11(18)3-4-13-14-5-6-16(22)19(14,2)10-15(21)17(13)18/h11,13-15,17,21H,3-10H2,1-2H3/t11-,13+,14+,15-,17-,18+,19+/m1/s1	FZEAQJIXYCPBLD-UUFFJORLSA-N	22960069	(5R,8S,9S,10S,11R,13S,14S)-11-hydroxy-10,13-dimethyl-2,4,5,6,7,8,9,11,12,14,15,16-dodecahydro-1H-cyclopenta[a]phenanthrene-3,17-dione
11α-hydroxyprogesterone	C21H30O3	80-75-1	CHEBI_16076	CC(=O)[C@H]1CC[C@@H]2[C@@]1(C[C@H]([C@H]3[C@H]2CCC4=CC(=O)CC[C@]34C)O)C	InChI=1S/C21H30O3/c1-12(22)16-6-7-17-15-5-4-13-10-14(23)8-9-20(13,2)19(15)18(24)11-21(16,17)3/h10,15-19,24H,4-9,11H2,1-3H3/t15-,16+,17-,18+,19+,20-,21+/m0/s1	BFZHCUBIASXHPK-QJSKAATBSA-N	92730	(8S,9S,10R,11R,13S,14S,17S)-17-acetyl-11-hydroxy-10,13-dimethyl-1,2,6,7,8,9,11,12,14,15,16,17-dodecahydrocyclopenta[a]phenanthren-3-one
11β-hydroxyandrostenedione	C19H26O3	382-44-5	CHEBI_27967	C[C@]12CCC(=O)C=C1CC[C@@H]3[C@@H]2[C@H](C[C@]4([C@H]3CCC4=O)C)O	InChI=1S/C19H26O3/c1-18-8-7-12(20)9-11(18)3-4-13-14-5-6-16(22)19(14,2)10-15(21)17(13)18/h9,13-15,17,21H,3-8,10H2,1-2H3/t13-,14-,15-,17+,18-,19-/m0/s1	WSCUHXPGYUMQEX-KCZNZURUSA-N	94141	(8S,9S,10R,11S,13S,14S)-11-hydroxy-10,13-dimethyl-2,6,7,8,9,11,12,14,15,16-decahydro-1H-cyclopenta[a]phenanthrene-3,17-dione
11β-hydroxyandrosterone	C19H30O3	57-61-4	CHEBI_34350	C[C@]12CC[C@H](C[C@@H]1CC[C@@H]3[C@@H]2[C@H](C[C@]4([C@H]3CCC4=O)C)O)O	InChI=1S/C19H30O3/c1-18-8-7-12(20)9-11(18)3-4-13-14-5-6-16(22)19(14,2)10-15(21)17(13)18/h11-15,17,20-21H,3-10H2,1-2H3/t11-,12+,13-,14-,15-,17+,18-,19-/m0/s1	PIXFHVWJOVNKQK-PTXZMSDUSA-N	10286365	(3R,5S,8S,9S,10S,11S,13S,14S)-3,11-dihydroxy-10,13-dimethyl-1,2,3,4,5,6,7,8,9,11,12,14,15,16-tetradecahydrocyclopenta[a]phenanthren-17-one
11β-hydroxyepiandrosterone	C19H30O3	514-17-0	CHEBI_173049	C[C@]12CC[C@@H](C[C@@H]1CC[C@@H]3[C@@H]2[C@H](C[C@]4([C@H]3CCC4=O)C)O)O	InChI=1S/C19H30O3/c1-18-8-7-12(20)9-11(18)3-4-13-14-5-6-16(22)19(14,2)10-15(21)17(13)18/h11-15,17,20-21H,3-10H2,1-2H3/t11-,12-,13-,14-,15-,17+,18-,19-/m0/s1	PIXFHVWJOVNKQK-CZQRWWPKSA-N	16061357	(3S,5S,8S,9S,10S,11S,13S,14S)-3,11-dihydroxy-10,13-dimethyl-1,2,3,4,5,6,7,8,9,11,12,14,15,16-tetradecahydrocyclopenta[a]phenanthren-17-one
11β-hydroxyetiocholanedione	C19H28O3	32694-35-2	CHEBI_746872	C[C@]12CCC(=O)C[C@H]1CC[C@@H]3[C@@H]2[C@H](C[C@]4([C@H]3CCC4=O)C)O	InChI=1S/C19H28O3/c1-18-8-7-12(20)9-11(18)3-4-13-14-5-6-16(22)19(14,2)10-15(21)17(13)18/h11,13-15,17,21H,3-10H2,1-2H3/t11-,13+,14+,15+,17-,18+,19+/m1/s1	FZEAQJIXYCPBLD-BTXBGGNNSA-N	69943735	(5R,8S,9S,10S,11S,13S,14S)-11-hydroxy-10,13-dimethyl-2,4,5,6,7,8,9,11,12,14,15,16-dodecahydro-1H-cyclopenta[a]phenanthrene-3,17-dione
11β-hydroxyetiocholanolone	C19H30O3	739-26-4	CHEBI_34351	C[C@]12CC[C@H](C[C@H]1CC[C@@H]3[C@@H]2[C@H](C[C@]4([C@H]3CCC4=O)C)O)O	InChI=1S/C19H30O3/c1-18-8-7-12(20)9-11(18)3-4-13-14-5-6-16(22)19(14,2)10-15(21)17(13)18/h11-15,17,20-21H,3-10H2,1-2H3/t11-,12-,13+,14+,15+,17-,18+,19+/m1/s1	PIXFHVWJOVNKQK-DLAZEALESA-N	101849	(3R,5R,8S,9S,10S,11S,13S,14S)-3,11-dihydroxy-10,13-dimethyl-1,2,3,4,5,6,7,8,9,11,12,14,15,16-tetradecahydrocyclopenta[a]phenanthren-17-one
11β-hydroxyprogesterone	C21H30O3	600-57-7	CHEBI_28247	CC(=O)[C@H]1CC[C@@H]2[C@@]1(C[C@@H]([C@H]3[C@H]2CCC4=CC(=O)CC[C@]34C)O)C	InChI=1S/C21H30O3/c1-12(22)16-6-7-17-15-5-4-13-10-14(23)8-9-20(13,2)19(15)18(24)11-21(16,17)3/h10,15-19,24H,4-9,11H2,1-3H3/t15-,16+,17-,18-,19+,20-,21+/m0/s1	BFZHCUBIASXHPK-ATWVFEABSA-N	101788	(8S,9S,10R,11S,13S,14S,17S)-17-acetyl-11-hydroxy-10,13-dimethyl-1,2,6,7,8,9,11,12,14,15,16,17-dodecahydrocyclopenta[a]phenanthren-3-one
11β-hydroxytestosterone	C19H28O3	1816-85-9	CHEBI_81481	C[C@]12CCC(=O)C=C1CC[C@@H]3[C@@H]2[C@H](C[C@]4([C@H]3CC[C@@H]4O)C)O	InChI=1S/C19H28O3/c1-18-8-7-12(20)9-11(18)3-4-13-14-5-6-16(22)19(14,2)10-15(21)17(13)18/h9,13-17,21-22H,3-8,10H2,1-2H3/t13-,14-,15-,16-,17+,18-,19-/m0/s1	YQDZGFAYWGWSJK-SLMGBJJTSA-N	114920	(8S,9S,10R,11S,13S,14S,17S)-11,17-dihydroxy-10,13-dimethyl-1,2,6,7,8,9,11,12,14,15,16,17-dodecahydrocyclopenta[a]phenanthren-3-one
11-dehydrocorticosterone	C21H28O4	72-23-1	CHEBI_78600	C[C@]12CC(=O)[C@H]3[C@@H](CCC4=CC(=O)CC[C@]34C)[C@@H]1CC[C@@H]2C(=O)CO	InChI=1S/C21H28O4/c1-20-8-7-13(23)9-12(20)3-4-14-15-5-6-16(18(25)11-22)21(15,2)10-17(24)19(14)20/h9,14-16,19,22H,3-8,10-11H2,1-2H3/t14-,15-,16+,19+,20-,21-/m0/s1	FUFLCEKSBBHCMO-KJQYFISQSA-N	5311364	(8S,9S,10R,13S,14S,17S)-17-(2-hydroxyacetyl)-10,13-dimethyl-2,6,7,8,9,12,14,15,16,17-decahydro-1H-cyclopenta[a]phenanthrene-3,11-dione
11-deoxycorticosterone	C21H30O3	64-85-7	CHEBI_16973	C[C@]12CC[C@H]3[C@H]([C@@H]1CC[C@@H]2C(=O)CO)CCC4=CC(=O)CC[C@]34C	InChI=1S/C21H30O3/c1-20-9-7-14(23)11-13(20)3-4-15-16-5-6-18(19(24)12-22)21(16,2)10-8-17(15)20/h11,15-18,22H,3-10,12H2,1-2H3/t15-,16-,17-,18+,20-,21-/m0/s1	ZESRJSPZRDMNHY-YFWFAHHUSA-N	6166	(8S,9S,10R,13S,14S,17S)-17-(2-hydroxyacetyl)-10,13-dimethyl-1,2,6,7,8,9,11,12,14,15,16,17-dodecahydrocyclopenta[a]phenanthren-3-one
11-deoxycorticosterone 13C3	C21H30O3	2482452-16-2		C[C@]12CCC3C(C1CCC2C(=O)CO)CCC4=[13CH][13C](=O)[13CH2]C[C@]34C	InChI=1S/C21H30O3/c1-20-9-7-14(23)11-13(20)3-4-15-16-5-6-18(19(24)12-22)21(16,2)10-8-17(15)20/h11,15-18,22H,3-10,12H2,1-2H3/t15?,16?,17?,18?,20-,21-/m0/s1/i7+1,11+1,14+1	ZESRJSPZRDMNHY-RZDKJTFNSA-N	124203092	(10R,13S)-17-(2-hydroxyacetyl)-10,13-dimethyl-1,2,6,7,8,9,11,12,14,15,16,17-dodecahydrocyclopenta[a]phenanthren-3-one
11-deoxycortisol	C21H30O4	152-58-9	CHEBI_28324	C[C@]12CCC(=O)C=C1CC[C@@H]3[C@@H]2CC[C@]4([C@H]3CC[C@@]4(C(=O)CO)O)C	InChI=1S/C21H30O4/c1-19-8-5-14(23)11-13(19)3-4-15-16(19)6-9-20(2)17(15)7-10-21(20,25)18(24)12-22/h11,15-17,22,25H,3-10,12H2,1-2H3/t15-,16+,17+,19+,20+,21+/m1/s1	WHBHBVVOGNECLV-OBQKJFGGSA-N	440707	(8R,9S,10R,13S,14S,17R)-17-hydroxy-17-(2-hydroxyacetyl)-10,13-dimethyl-2,6,7,8,9,11,12,14,15,16-decahydro-1H-cyclopenta[a]phenanthren-3-one
11-deoxycortisol 13C3	C21H30O4	2482467-26-3		C[C@]12CCC3C(C1CC[C@@]2(C(=O)CO)O)CCC4=[13CH][13C](=O)[13CH2]C[C@]34C	InChI=1S/C21H30O4/c1-19-8-5-14(23)11-13(19)3-4-15-16(19)6-9-20(2)17(15)7-10-21(20,25)18(24)12-22/h11,15-17,22,25H,3-10,12H2,1-2H3/t15?,16?,17?,19-,20-,21-/m0/s1/i5+1,11+1,14+1	WHBHBVVOGNECLV-HSCQNOFGSA-N	124203093	(10R,13S,17R)-17-hydroxy-17-(2-hydroxyacetyl)-10,13-dimethyl-2,6,7,8,9,11,12,14,15,16-decahydro-1H-cyclopenta[a]phenanthren-3-one
11-ketoandrostenedione	C19H24O3	382-45-6	CHEBI_2495	C[C@]12CCC(=O)C=C1CC[C@@H]3[C@@H]2C(=O)C[C@]4([C@H]3CCC4=O)C	InChI=1S/C19H24O3/c1-18-8-7-12(20)9-11(18)3-4-13-14-5-6-16(22)19(14,2)10-15(21)17(13)18/h9,13-14,17H,3-8,10H2,1-2H3/t13-,14-,17+,18-,19-/m0/s1	RZRPTBIGEANTGU-IRIMSJTPSA-N	223997	(8S,9S,10R,13S,14S)-10,13-dimethyl-1,2,6,7,8,9,12,14,15,16-decahydrocyclopenta[a]phenanthrene-3,11,17-trione
11-ketoandrosterone	C19H28O3	1231-82-9	CHEBI_34134	C[C@]12CC[C@H](C[C@@H]1CC[C@@H]3[C@@H]2C(=O)C[C@]4([C@H]3CCC4=O)C)O	InChI=1S/C19H28O3/c1-18-8-7-12(20)9-11(18)3-4-13-14-5-6-16(22)19(14,2)10-15(21)17(13)18/h11-14,17,20H,3-10H2,1-2H3/t11-,12+,13-,14-,17+,18-,19-/m0/s1	IUNYGQONJQTULL-UFTZPVOZSA-N	102029	(3R,5S,8S,9S,10S,13S,14S)-3-hydroxy-10,13-dimethyl-2,3,4,5,6,7,8,9,12,14,15,16-dodecahydro-1H-cyclopenta[a]phenanthrene-11,17-dione
11-ketodihydrotestosterone	C19H28O3	32694-37-4	CHEBI_234448	C[C@]12CCC(=O)C[C@@H]1CC[C@@H]3[C@@H]2C(=O)C[C@]4([C@H]3CC[C@@H]4O)C	InChI=1S/C19H28O3/c1-18-8-7-12(20)9-11(18)3-4-13-14-5-6-16(22)19(14,2)10-15(21)17(13)18/h11,13-14,16-17,22H,3-10H2,1-2H3/t11-,13-,14-,16-,17+,18-,19-/m0/s1	RSQKILYTRHKUIJ-HZGXJFKTSA-N	11197479	(5S,8S,9S,10S,13S,14S,17S)-17-hydroxy-10,13-dimethyl-2,4,5,6,7,8,9,12,14,15,16,17-dodecahydro-1H-cyclopenta[a]phenanthrene-3,11-dione
11-ketoetiocholanolone	C19H28O3	739-27-5	CHEBI_34135	C[C@]12CC[C@H](C[C@H]1CC[C@@H]3[C@@H]2C(=O)C[C@]4([C@H]3CCC4=O)C)O	InChI=1S/C19H28O3/c1-18-8-7-12(20)9-11(18)3-4-13-14-5-6-16(22)19(14,2)10-15(21)17(13)18/h11-14,17,20H,3-10H2,1-2H3/t11-,12-,13+,14+,17-,18+,19+/m1/s1	IUNYGQONJQTULL-UKZLPJRTSA-N	101850	(3R,5R,8S,9S,10S,13S,14S)-3-hydroxy-10,13-dimethyl-2,3,4,5,6,7,8,9,12,14,15,16-dodecahydro-1H-cyclopenta[a]phenanthrene-11,17-dione
11-ketoetiocholanolone Glucuronide	C25H36O9	17181-16-7	CHEBI_746874	C[C@@]12[C@@]3([C@]([C@]4([C@](C)(CC3=O)C(=O)CC4)[H])(CC[C@@]1(C[C@H](O[C@@H]5O[C@H](C(O)=O)[C@@H](O)[C@H](O)[C@H]5O)CC2)[H])[H])[H]	InChI=1S/C25H36O9/c1-24-8-7-12(33-23-20(30)18(28)19(29)21(34-23)22(31)32)9-11(24)3-4-13-14-5-6-16(27)25(14,2)10-15(26)17(13)24/h11-14,17-21,23,28-30H,3-10H2,1-2H3,(H,31,32)/t11-,12-,13+,14+,17-,18+,19+,20-,21+,23-,24+,25+/m1/s1	QTXWOOLAHRQMGZ-KYRWCVLKSA-N	44263359	(2S,3S,4S,5R,6R)-6-[[(3R,5R,8S,9S,10S,13S,14S)-10,13-dimethyl-11,17-dioxo-2,3,4,5,6,7,8,9,12,14,15,16-dodecahydro-1H-cyclopenta[a]phenanthren-3-yl]oxy]-3,4,5-trihydroxyoxane-2-carboxylic acid
11-ketoprogesterone	C21H28O3	516-15-4	CHEBI_166773	CC(=O)[C@H]1CC[C@@H]2[C@@]1(CC(=O)[C@H]3[C@H]2CCC4=CC(=O)CC[C@]34C)C	InChI=1S/C21H28O3/c1-12(22)16-6-7-17-15-5-4-13-10-14(23)8-9-20(13,2)19(15)18(24)11-21(16,17)3/h10,15-17,19H,4-9,11H2,1-3H3/t15-,16+,17-,19+,20-,21+/m0/s1	WKAVAGKRWFGIEA-DADBAOPHSA-N	94166	(8S,9S,10R,13S,14S,17S)-17-acetyl-10,13-dimethyl-2,6,7,8,9,12,14,15,16,17-decahydro-1H-cyclopenta[a]phenanthrene-3,11-dione
11-ketotestosterone	C19H26O3	564-35-2	CHEBI_34133	C[C@]12CCC(=O)C=C1CC[C@@H]3[C@@H]2C(=O)C[C@]4([C@H]3CC[C@@H]4O)C	InChI=1S/C19H26O3/c1-18-8-7-12(20)9-11(18)3-4-13-14-5-6-16(22)19(14,2)10-15(21)17(13)18/h9,13-14,16-17,22H,3-8,10H2,1-2H3/t13-,14-,16-,17+,18-,19-/m0/s1	WTPMRQZHJLJSBO-XQALERBDSA-N	5282365	(8S,9S,10R,13S,14S,17S)-17-hydroxy-10,13-dimethyl-2,6,7,8,9,12,14,15,16,17-decahydro-1H-cyclopenta[a]phenanthrene-3,11-dione
15β-hydroxytestosterone	C19H28O3	39605-73-7	CHEBI_746877	C[C@]12CCC(=O)C=C1CC[C@@H]3[C@@H]2CC[C@]4([C@H]3[C@@H](C[C@@H]4O)O)C	InChI=1S/C19H28O3/c1-18-7-5-12(20)9-11(18)3-4-13-14(18)6-8-19(2)16(22)10-15(21)17(13)19/h9,13-17,21-22H,3-8,10H2,1-2H3/t13-,14+,15-,16+,17-,18+,19-/m1/s1	KYGUQDTWUBBBSD-XJBBOAPUSA-N	53255472	(8R,9S,10R,13S,14S,15R,17S)-15,17-dihydroxy-10,13-dimethyl-1,2,6,7,8,9,11,12,14,15,16,17-dodecahydrocyclopenta[a]phenanthren-3-one
16α,17β-Estriol (E3)	C18H24O3	50-27-1	CHEBI_27974	C[C@]12CC[C@H]3[C@H]([C@@H]1C[C@H]([C@@H]2O)O)CCC4=C3C=CC(=C4)O	InChI=1S/C18H24O3/c1-18-7-6-13-12-5-3-11(19)8-10(12)2-4-14(13)15(18)9-16(20)17(18)21/h3,5,8,13-17,19-21H,2,4,6-7,9H2,1H3/t13-,14-,15+,16-,17+,18+/m1/s1	PROQIPRRNZUXQM-ZXXIGWHRSA-N	5756	(8R,9S,13S,14S,16R,17R)-13-methyl-6,7,8,9,11,12,14,15,16,17-decahydrocyclopenta[a]phenanthrene-3,16,17-triol
16α,17β-Estriol 13C3	C18H24O3	1255639-56-5		C[C@]12CC[C@H]3[C@H]([C@@H]1C[C@H]([C@@H]2O)O)CCC4=C3C=[13CH][13C](=[13CH]4)O	InChI=1S/C18H24O3/c1-18-7-6-13-12-5-3-11(19)8-10(12)2-4-14(13)15(18)9-16(20)17(18)21/h3,5,8,13-17,19-21H,2,4,6-7,9H2,1H3/t13-,14-,15+,16-,17+,18+/m1/s1/i3+1,8+1,11+1	PROQIPRRNZUXQM-FDFADMNFSA-N	71311007	(8R,9S,13S,14S,16R,17R)-13-methyl-6,7,8,9,11,12,14,15,16,17-decahydrocyclopenta[a]phenanthrene-3,16,17-triol
16α-hydroxyandrostenedione	19H26O3	63-02-5	CHEBI_27582	C[C@]12CCC(=O)C=C1CC[C@@H]3[C@@H]2CC[C@]4([C@H]3C[C@H](C4=O)O)C	InChI=1S/C19H26O3/c1-18-7-5-12(20)9-11(18)3-4-13-14(18)6-8-19(2)15(13)10-16(21)17(19)22/h9,13-16,21H,3-8,10H2,1-2H3/t13-,14+,15+,16-,18+,19+/m1/s1	SSBCZTXGVMMZOT-NBBHSKLNSA-N	440574	(8R,9S,10R,13S,14S,16R)-16-hydroxy-10,13-dimethyl-2,6,7,8,9,11,12,14,15,16-decahydro-1H-cyclopenta[a]phenanthrene-3,17-dione
16α-hydroxyandrosterone	C19H30O3	14167-49-8	CHEBI_173260	C[C@]12CC[C@H](C[C@@H]1CC[C@@H]3[C@@H]2CC[C@]4([C@H]3C[C@H](C4=O)O)C)O	InChI=1S/C19H30O3/c1-18-7-5-12(20)9-11(18)3-4-13-14(18)6-8-19(2)15(13)10-16(21)17(19)22/h11-16,20-21H,3-10H2,1-2H3/t11-,12+,13+,14-,15-,16+,18-,19-/m0/s1	HLQYTKUIIJTNHH-LLIWRYSGSA-N	11347327	(3R,5S,8R,9S,10S,13S,14S,16R)-3,16-dihydroxy-10,13-dimethyl-1,2,3,4,5,6,7,8,9,11,12,14,15,16-tetradecahydrocyclopenta[a]phenanthren-17-one
16α-hydroxy-DHEA	C19H28O3	1232-73-1	CHEBI_27771	C[C@]12CC[C@@H](CC1=CC[C@@H]3[C@@H]2CC[C@]4([C@H]3C[C@H](C4=O)O)C)O	InChI=1S/C19H28O3/c1-18-7-5-12(20)9-11(18)3-4-13-14(18)6-8-19(2)15(13)10-16(21)17(19)22/h3,12-16,20-21H,4-10H2,1-2H3/t12-,13+,14-,15-,16+,18-,19-/m0/s1	QQIVKFZWLZJXJT-DNKQKWOHSA-N	102030	(3S,8R,9S,10R,13S,14S,16R)-3,16-dihydroxy-10,13-dimethyl-1,2,3,4,7,8,9,11,12,14,15,16-dodecahydrocyclopenta[a]phenanthren-17-one
16α-hydroxyetiocholanolone	C19H30O3	14167-50-1	CHEBI_746878	C[C@]12CC[C@H](C[C@H]1CC[C@@H]3[C@@H]2CC[C@]4([C@H]3C[C@H](C4=O)O)C)O	InChI=1S/C19H30O3/c1-18-7-5-12(20)9-11(18)3-4-13-14(18)6-8-19(2)15(13)10-16(21)17(19)22/h11-16,20-21H,3-10H2,1-2H3/t11-,12-,13-,14+,15+,16-,18+,19+/m1/s1	HLQYTKUIIJTNHH-NMTBMHBSSA-N	11243707	(3R,5R,8R,9S,10S,13S,14S,16R)-3,16-dihydroxy-10,13-dimethyl-1,2,3,4,5,6,7,8,9,11,12,14,15,16-tetradecahydrocyclopenta[a]phenanthren-17-one
16α-hydroxypregnenolone	C21H32O3	520-88-7	CHEBI_771	CC(=O)[C@H]1[C@@H](C[C@@H]2[C@@]1(CC[C@H]3[C@H]2CC=C4[C@@]3(CC[C@@H](C4)O)C)C)O	InChI=1S/C21H32O3/c1-12(22)19-18(24)11-17-15-5-4-13-10-14(23)6-8-20(13,2)16(15)7-9-21(17,19)3/h4,14-19,23-24H,5-11H2,1-3H3/t14-,15+,16-,17-,18+,19-,20-,21-/m0/s1	ZAKJZPQDUPCXSD-YRWKUUEZSA-N	6452574	1-[(3S,8S,9S,10R,13S,14S,16R,17R)-3,16-dihydroxy-10,13-dimethyl-2,3,4,7,8,9,11,12,14,15,16,17-dodecahydro-1H-cyclopenta[a]phenanthren-17-yl]ethanone
16α-hydroxyprogesterone	C21H30O3	438-07-3	CHEBI_15826	CC(=O)[C@H]1[C@@H](C[C@@H]2[C@@]1(CC[C@H]3[C@H]2CCC4=CC(=O)CC[C@]34C)C)O	InChI=1S/C21H30O3/c1-12(22)19-18(24)11-17-15-5-4-13-10-14(23)6-8-20(13,2)16(15)7-9-21(17,19)3/h10,15-19,24H,4-9,11H2,1-3H3/t15-,16+,17+,18-,19+,20+,21+/m1/s1	LOVNYFVWYTXDRE-RMWFXKKMSA-N	243761	(8S,9S,10R,13S,14S,16R,17R)-17-acetyl-16-hydroxy-10,13-dimethyl-1,2,6,7,8,9,11,12,14,15,16,17-dodecahydrocyclopenta[a]phenanthren-3-one
16α-hydroxytestosterone	C19H28O3	63-01-4	CHEBI_34172	C[C@]12CCC(=O)C=C1CC[C@@H]3[C@@H]2CC[C@]4([C@H]3C[C@H]([C@@H]4O)O)C	InChI=1S/C19H28O3/c1-18-7-5-12(20)9-11(18)3-4-13-14(18)6-8-19(2)15(13)10-16(21)17(19)22/h9,13-17,21-22H,3-8,10H2,1-2H3/t13-,14+,15+,16-,17+,18+,19+/m1/s1	YMCWOAZGWMZGQT-FPNLOETNSA-N	65545	(8R,9S,10R,13S,14S,16R,17R)-16,17-dihydroxy-10,13-dimethyl-1,2,6,7,8,9,11,12,14,15,16,17-dodecahydrocyclopenta[a]phenanthren-3-one
16β-hydroxy-DHEA	C19H28O3	1159-68-8	CHEBI_168395	C[C@]12CC[C@@H](CC1=CC[C@@H]3[C@@H]2CC[C@]4([C@H]3C[C@@H](C4=O)O)C)O	InChI=1S/C19H28O3/c1-18-7-5-12(20)9-11(18)3-4-13-14(18)6-8-19(2)15(13)10-16(21)17(19)22/h3,12-16,20-21H,4-10H2,1-2H3/t12-,13+,14-,15-,16-,18-,19-/m0/s1	QQIVKFZWLZJXJT-HLUDHZFRSA-N	6451197	(3S,8R,9S,10R,13S,14S,16S)-3,16-dihydroxy-10,13-dimethyl-1,2,3,4,7,8,9,11,12,14,15,16-dodecahydrocyclopenta[a]phenanthren-17-one
16β-hydroxytestosterone	C19H28O3	17528-90-4	CHEBI_83027	C[C@]12CCC(=O)C=C1CC[C@@H]3[C@@H]2CC[C@]4([C@H]3C[C@@H]([C@@H]4O)O)C	InChI=1S/C19H28O3/c1-18-7-5-12(20)9-11(18)3-4-13-14(18)6-8-19(2)15(13)10-16(21)17(19)22/h9,13-17,21-22H,3-8,10H2,1-2H3/t13-,14+,15+,16+,17+,18+,19+/m1/s1	YMCWOAZGWMZGQT-KYQPOWKGSA-N	15708880	(8R,9S,10R,13S,14S,16S,17R)-16,17-dihydroxy-10,13-dimethyl-1,2,6,7,8,9,11,12,14,15,16,17-dodecahydrocyclopenta[a]phenanthren-3-one
16β-ketoestradiol	C18H22O3	566-75-6	CHEBI_34165	C[C@]12CC[C@H]3[C@H]([C@@H]1CC(=O)[C@@H]2O)CCC4=C3C=CC(=C4)O	InChI=1S/C18H22O3/c1-18-7-6-13-12-5-3-11(19)8-10(12)2-4-14(13)15(18)9-16(20)17(18)21/h3,5,8,13-15,17,19,21H,2,4,6-7,9H2,1H3/t13-,14-,15+,17+,18+/m1/s1	KJDGFQJCHFJTRH-YONAWACDSA-N	66417	(8R,9S,13S,14S,17R)-3,17-dihydroxy-13-methyl-7,8,9,11,12,14,15,17-octahydro-6H-cyclopenta[a]phenanthren-16-one
16-oxoandrostenediol	C19H28O3	1159-66-6	CHEBI_173191	C[C@]12CC[C@@H](CC1=CC[C@@H]3[C@@H]2CC[C@]4([C@H]3CC(=O)[C@@H]4O)C)O	InChI=1S/C19H28O3/c1-18-7-5-12(20)9-11(18)3-4-13-14(18)6-8-19(2)15(13)10-16(21)17(19)22/h3,12-15,17,20,22H,4-10H2,1-2H3/t12-,13+,14-,15-,17-,18-,19-/m0/s1	AKRBLZKRYPEVIK-PEMPUTJUSA-N	150890	(3S,8R,9S,10R,13S,14S,17R)-3,17-dihydroxy-10,13-dimethyl-1,2,3,4,7,8,9,11,12,14,15,17-dodecahydrocyclopenta[a]phenanthren-16-one
17α,20α-dihydroxyprogesterone	C21H32O3	652-69-7	CHEBI_16418	C[C@@H]([C@]1(CC[C@@H]2[C@@]1(CC[C@H]3[C@H]2CCC4=CC(=O)CC[C@]34C)C)O)O	InChI=1S/C21H32O3/c1-13(22)21(24)11-8-18-16-5-4-14-12-15(23)6-9-19(14,2)17(16)7-10-20(18,21)3/h12-13,16-18,22,24H,4-11H2,1-3H3/t13-,16+,17-,18-,19-,20-,21-/m0/s1	MASCESDECGBIBB-HNXXTFFGSA-N	440368	(8R,9S,10R,13S,14S,17R)-17-hydroxy-17-[(1S)-1-hydroxyethyl]-10,13-dimethyl-2,6,7,8,9,11,12,14,15,16-decahydro-1H-cyclopenta[a]phenanthren-3-one
17α-Estradiol	C18H24O2	57-91-0	CHEBI_17160	C[C@]12CC[C@H]3[C@H]([C@@H]1CC[C@H]2O)CCC4=C3C=CC(=C4)O	InChI=1S/C18H24O2/c1-18-9-8-14-13-5-3-12(19)10-11(13)2-4-15(14)16(18)6-7-17(18)20/h3,5,10,14-17,19-20H,2,4,6-9H2,1H3/t14-,15-,16+,17-,18+/m1/s1	VOXZDWNPVJITMN-SFFUCWETSA-N	68570	(8R,9S,13S,14S,17R)-13-methyl-6,7,8,9,11,12,14,15,16,17-decahydrocyclopenta[a]phenanthrene-3,17-diol
17α-hydroxyallopregnanolone	C21H34O3	6890-65-9	CHEBI_194477	CC(=O)[C@]1(CC[C@@H]2[C@@]1(CC[C@H]3[C@H]2CC[C@@H]4[C@@]3(CC[C@H](C4)O)C)C)O	InChI=1S/C21H34O3/c1-13(22)21(24)11-8-18-16-5-4-14-12-15(23)6-9-19(14,2)17(16)7-10-20(18,21)3/h14-18,23-24H,4-12H2,1-3H3/t14-,15+,16+,17-,18-,19-,20-,21-/m0/s1	LKQDFQLSEHWIRK-JRRMKBMNSA-N	111243	1-[(3R,5S,8R,9S,10S,13S,14S,17R)-3,17-dihydroxy-10,13-dimethyl-1,2,3,4,5,6,7,8,9,11,12,14,15,16-tetradecahydrocyclopenta[a]phenanthren-17-yl]ethanone
17α-hydroxypregnanolone	C21H34O3	570-52-5	CHEBI_34353	CC(=O)[C@]1(CC[C@@H]2[C@@]1(CC[C@H]3[C@H]2CC[C@H]4[C@@]3(CC[C@H](C4)O)C)C)O	InChI=1S/C21H34O3/c1-13(22)21(24)11-8-18-16-5-4-14-12-15(23)6-9-19(14,2)17(16)7-10-20(18,21)3/h14-18,23-24H,4-12H2,1-3H3/t14-,15-,16-,17+,18+,19+,20+,21+/m1/s1	LKQDFQLSEHWIRK-UKBVDAKRSA-N	101773	1-[(3R,5R,8R,9S,10S,13S,14S,17R)-3,17-dihydroxy-10,13-dimethyl-1,2,3,4,5,6,7,8,9,11,12,14,15,16-tetradecahydrocyclopenta[a]phenanthren-17-yl]ethanone
17α-hydroxypregnenolone	C21H32O3	387-79-1	CHEBI_28750	CC(=O)[C@]1(CC[C@@H]2[C@@]1(CC[C@H]3[C@H]2CC=C4[C@@]3(CC[C@@H](C4)O)C)C)O	InChI=1S/C21H32O3/c1-13(22)21(24)11-8-18-16-5-4-14-12-15(23)6-9-19(14,2)17(16)7-10-20(18,21)3/h4,15-18,23-24H,5-12H2,1-3H3/t15-,16+,17-,18-,19-,20-,21-/m0/s1	JERGUCIJOXJXHF-TVWVXWENSA-N	91451	1-[(3S,8R,9S,10R,13S,14S,17R)-3,17-dihydroxy-10,13-dimethyl-1,2,3,4,7,8,9,11,12,14,15,16-dodecahydrocyclopenta[a]phenanthren-17-yl]ethanone
17α-hydroxypregnenolone 13C2 d2	C21H32O3			[2H]C1(CC2C3CC=C4CC(CC[C@@]4(C3CC[C@@]2([C@]1([13C](=O)[13CH3])O)C)C)O)[2H]	InChI=1S/C21H32O3/c1-13(22)21(24)11-8-18-16-5-4-14-12-15(23)6-9-19(14,2)17(16)7-10-20(18,21)3/h4,15-18,23-24H,5-12H2,1-3H3/t15?,16?,17?,18?,19-,20-,21-/m0/s1/i1+1,11D2,13+1	JERGUCIJOXJXHF-AQOZABEKSA-N	124202961	1-[(10R,13S,17R)-16,16-dideuterio-3,17-dihydroxy-10,13-dimethyl-2,3,4,7,8,9,11,12,14,15-decahydro-1H-cyclopenta[a]phenanthren-17-yl](1,2-13C2)ethanone
17α-hydroxyprogesterone	C21H30O3	68-96-2	CHEBI_17252	CC(=O)[C@]1(CC[C@@H]2[C@@]1(CC[C@H]3[C@H]2CCC4=CC(=O)CC[C@]34C)C)O	InChI=1S/C21H30O3/c1-13(22)21(24)11-8-18-16-5-4-14-12-15(23)6-9-19(14,2)17(16)7-10-20(18,21)3/h12,16-18,24H,4-11H2,1-3H3/t16-,17+,18+,19+,20+,21+/m1/s1	DBPWSSGDRRHUNT-CEGNMAFCSA-N	6238	(8R,9S,10R,13S,14S,17R)-17-acetyl-17-hydroxy-10,13-dimethyl-2,6,7,8,9,11,12,14,15,16-decahydro-1H-cyclopenta[a]phenanthren-3-one
17α-hydroxyprogesterone 13C3	C21H30O3	1356154-92-1		CC(=O)[C@]1(CC[C@@H]2[C@@]1(CC[C@H]3[C@H]2CCC4=[13CH][13C](=O)[13CH2]C[C@]34C)C)O	InChI=1S/C21H30O3/c1-13(22)21(24)11-8-18-16-5-4-14-12-15(23)6-9-19(14,2)17(16)7-10-20(18,21)3/h12,16-18,24H,4-11H2,1-3H3/t16-,17+,18+,19+,20+,21+/m1/s1/i6+1,12+1,15+1	DBPWSSGDRRHUNT-GGSYSODVSA-N	71310977	(8R,9S,10R,13S,14S,17R)-17-acetyl-17-hydroxy-10,13-dimethyl-2,6,7,8,9,11,12,14,15,16-decahydro-1H-cyclopenta[a]phenanthren-3-one
17β-Estradiol (E2)	C18H24O2	50-28-2	CHEBI_16469	C[C@]12CC[C@H]3[C@H]([C@@H]1CC[C@@H]2O)CCC4=C3C=CC(=C4)O	InChI=1S/C18H24O2/c1-18-9-8-14-13-5-3-12(19)10-11(13)2-4-15(14)16(18)6-7-17(18)20/h3,5,10,14-17,19-20H,2,4,6-9H2,1H3/t14-,15-,16+,17+,18+/m1/s1	VOXZDWNPVJITMN-ZBRFXRBCSA-N	5757	(8R,9S,13S,14S,17S)-13-methyl-6,7,8,9,11,12,14,15,16,17-decahydrocyclopenta[a]phenanthrene-3,17-diol
17β-Estradiol 13C3	C18H24O2	1261254-48-1		C[C@]12CC[C@H]3[C@H]([C@@H]1CC[C@@H]2O)CCC4=C3C=[13CH][13C](=[13CH]4)O	InChI=1S/C18H24O2/c1-18-9-8-14-13-5-3-12(19)10-11(13)2-4-15(14)16(18)6-7-17(18)20/h3,5,10,14-17,19-20H,2,4,6-9H2,1H3/t14-,15-,16+,17+,18+/m1/s1/i3+1,10+1,12+1	VOXZDWNPVJITMN-CLMZCXLCSA-N	71310840	(8R,9S,13S,14S,17S)-13-methyl-6,7,8,9,11,12,14,15,16,17-decahydrocyclopenta[a]phenanthrene-3,17-diol
17β-Estradiol Glucuronide	C24H32O8	15270-30-1	CHEBI_36489	C[C@]12CC[C@H]3[C@H]([C@@H]1CC[C@@H]2O)CCC4=C3C=CC(=C4)O[C@H]5[C@@H]([C@H]([C@@H]([C@H](O5)C(=O)O)O)O)O	InChI=1S/C24H32O8/c1-24-9-8-14-13-5-3-12(10-11(13)2-4-15(14)16(24)6-7-17(24)25)31-23-20(28)18(26)19(27)21(32-23)22(29)30/h3,5,10,14-21,23,25-28H,2,4,6-9H2,1H3,(H,29,30)/t14-,15-,16+,17+,18+,19+,20-,21+,23-,24+/m1/s1	MUOHJTRCBBDUOW-QXYWQCSFSA-N	440713	(2S,3S,4S,5R,6S)-3,4,5-trihydroxy-6-[[(8R,9S,13S,14S,17S)-17-hydroxy-13-methyl-6,7,8,9,11,12,14,15,16,17-decahydrocyclopenta[a]phenanthren-3-yl]oxy]oxane-2-carboxylic acid
18-hydroxycortisol	C21H30O6	86002-90-6	CHEBI_89455	C[C@]12CCC(=O)C=C1CC[C@@H]3[C@@H]2[C@H](C[C@]4([C@H]3CC[C@@]4(C(=O)CO)O)CO)O	InChI=1S/C21H30O6/c1-19-6-4-13(24)8-12(19)2-3-14-15-5-7-21(27,17(26)10-22)20(15,11-23)9-16(25)18(14)19/h8,14-16,18,22-23,25,27H,2-7,9-11H2,1H3/t14-,15-,16-,18+,19-,20+,21-/m0/s1	HESFZGWRDUVOMS-UKSDXMLSSA-N	10022549	(8S,9S,10R,11S,13S,14S,17R)-11,17-dihydroxy-17-(2-hydroxyacetyl)-13-(hydroxymethyl)-10-methyl-2,6,7,8,9,11,12,14,15,16-decahydro-1H-cyclopenta[a]phenanthren-3-one
19-hydroxyandrostenedione	C19H26O3	510-64-5	CHEBI_27576	C[C@]12CC[C@H]3[C@H]([C@@H]1CCC2=O)CCC4=CC(=O)CC[C@]34CO	InChI=1S/C19H26O3/c1-18-8-7-16-14(15(18)4-5-17(18)22)3-2-12-10-13(21)6-9-19(12,16)11-20/h10,14-16,20H,2-9,11H2,1H3/t14-,15-,16-,18-,19+/m0/s1	XGUHPTGEXRHMQQ-BGJMDTOESA-N	252379	(8R,9S,10S,13S,14S)-10-(hydroxymethyl)-13-methyl-2,6,7,8,9,11,12,14,15,16-decahydro-1H-cyclopenta[a]phenanthrene-3,17-dione
19-hydroxy-DHEA 3-sulfate	C19H28O6S	16753-47-2	CHEBI_746880	[H][C@@]1(CCC2=O)[C@]2(C)CC[C@@]3([H])[C@@]1([H])CC=C4[C@]3(CO)CC[C@H](OS(O)(=O)=O)C4	InChI=1S/C19H28O6S/c1-18-8-7-16-14(15(18)4-5-17(18)21)3-2-12-10-13(25-26(22,23)24)6-9-19(12,16)11-20/h2,13-16,20H,3-11H2,1H3,(H,22,23,24)/t13-,14-,15-,16-,18-,19+/m0/s1	RQEZOUFXXIWGDY-JLZSVDHQSA-N		[(3aS,3bR,7S,9aS,9bS,11aS)-9a-(hydroxymethyl)-11a-methyl-1-oxo-1H,2H,3H,3aH,3bH,4H,6H,7H,8H,9H,9aH,9bH,10H,11H,11aH-cyclopenta[a]phenanthren-7-yl]oxidanesulfonic acid
19-hydroxytestosterone	C19H28O3	2126-37-6	CHEBI_798	C[C@]12CC[C@H]3[C@H]([C@@H]1CC[C@@H]2O)CCC4=CC(=O)CC[C@]34CO	InChI=1S/C19H28O3/c1-18-8-7-16-14(15(18)4-5-17(18)22)3-2-12-10-13(21)6-9-19(12,16)11-20/h10,14-17,20,22H,2-9,11H2,1H3/t14-,15-,16-,17-,18-,19+/m0/s1	YLTCTXBDDHSLCS-KOUJMVCDSA-N	150968	(8R,9S,10S,13S,14S,17S)-17-hydroxy-10-(hydroxymethyl)-13-methyl-1,2,6,7,8,9,11,12,14,15,16,17-dodecahydrocyclopenta[a]phenanthren-3-one
19-norandrosterone	C18H28O2	1225-01-0	CHEBI_36412	C[C@]12CC[C@@H]3[C@H]4CC[C@H](C[C@@H]4CC[C@H]3[C@@H]1CCC2=O)O	InChI=1S/C18H28O2/c1-18-9-8-14-13-5-3-12(19)10-11(13)2-4-15(14)16(18)6-7-17(18)20/h11-16,19H,2-10H2,1H3/t11-,12+,13-,14+,15+,16-,18-/m0/s1	UOUIARGWRPHDBX-CQZDKXCPSA-N	9548753	(3R,5S,8R,9R,10S,13S,14S)-3-hydroxy-13-methyl-2,3,4,5,6,7,8,9,10,11,12,14,15,16-tetradecahydro-1H-cyclopenta[a]phenanthren-17-one
19-noretiocholanolone	C18H28O2	33036-33-8	CHEBI_746883	C[C@]12CC[C@@H]3[C@H]4CC[C@H](C[C@H]4CC[C@H]3[C@@H]1CCC2=O)O	InChI=1S/C18H28O2/c1-18-9-8-14-13-5-3-12(19)10-11(13)2-4-15(14)16(18)6-7-17(18)20/h11-16,19H,2-10H2,1H3/t11-,12-,13+,14-,15-,16+,18+/m1/s1	UOUIARGWRPHDBX-DHMVHTBWSA-N	14009228	(3R,5R,8R,9R,10S,13S,14S)-3-hydroxy-13-methyl-2,3,4,5,6,7,8,9,10,11,12,14,15,16-tetradecahydro-1H-cyclopenta[a]phenanthren-17-one
19-nortestosterone	C18H26O2	434-22-0	CHEBI_7466	C[C@]12CC[C@H]3[C@H]([C@@H]1CC[C@@H]2O)CCC4=CC(=O)CC[C@H]34	InChI=1S/C18H26O2/c1-18-9-8-14-13-5-3-12(19)10-11(13)2-4-15(14)16(18)6-7-17(18)20/h10,13-17,20H,2-9H2,1H3/t13-,14+,15+,16-,17-,18-/m0/s1	NPAGDVCDWIYMMC-IZPLOLCNSA-N	9904	(8R,9S,10R,13S,14S,17S)-17-hydroxy-13-methyl-2,6,7,8,9,10,11,12,14,15,16,17-dodecahydro-1H-cyclopenta[a]phenanthren-3-one
20α-cortol	C21H36O5	516-38-1	CHEBI_3898	C[C@]12CC[C@H](C[C@H]1CC[C@@H]3[C@@H]2[C@H](C[C@]4([C@H]3CC[C@@]4([C@H](CO)O)O)C)O)O	InChI=1S/C21H36O5/c1-19-7-5-13(23)9-12(19)3-4-14-15-6-8-21(26,17(25)11-22)20(15,2)10-16(24)18(14)19/h12-18,22-26H,3-11H2,1-2H3/t12-,13-,14+,15+,16+,17+,18-,19+,20+,21+/m1/s1	FFPUNPBUZDTHJI-XPOJVAQCSA-N	246873	(3R,5R,8S,9S,10S,11S,13S,14S,17R)-17-[(1S)-1,2-dihydroxyethyl]-10,13-dimethyl-1,2,3,4,5,6,7,8,9,11,12,14,15,16-tetradecahydrocyclopenta[a]phenanthrene-3,11,17-triol
20α-cortolone	C21H34O5	516-42-7	CHEBI_3899	C1C[C@H](C[C@@H]2[C@]1([C@@H]1[C@@H](CC2)[C@H]2[C@](CC1=O)([C@](CC2)([C@H](CO)O)O)C)C)O	InChI=1S/C21H34O5/c1-19-7-5-13(23)9-12(19)3-4-14-15-6-8-21(26,17(25)11-22)20(15,2)10-16(24)18(14)19/h12-15,17-18,22-23,25-26H,3-11H2,1-2H3/t12-,13-,14+,15+,17+,18-,19+,20+,21+/m1/s1	JXCOSKURGJMQSG-AZQJGLEESA-N	160499	(3R,5R,8S,9S,10S,13S,14S,17R)-17-[(1S)-1,2-dihydroxyethyl]-3,17-dihydroxy-10,13-dimethyl-2,3,4,5,6,7,8,9,12,14,15,16-dodecahydro-1H-cyclopenta[a]phenanthren-11-one
20α-dihydrocortisol	C21H32O5	1719-79-5	CHEBI_746884	C[C@]12CCC(=O)C=C1CC[C@@H]3[C@@H]2[C@H](C[C@]4([C@H]3CC[C@@]4([C@H](CO)O)O)C)O	InChI=1S/C21H32O5/c1-19-7-5-13(23)9-12(19)3-4-14-15-6-8-21(26,17(25)11-22)20(15,2)10-16(24)18(14)19/h9,14-18,22,24-26H,3-8,10-11H2,1-2H3/t14-,15-,16-,17-,18+,19-,20-,21-/m0/s1	AWWCEQOCFFQUKS-FJWDNACWSA-N	256288	(8S,9S,10R,11S,13S,14S,17R)-17-[(1S)-1,2-dihydroxyethyl]-11,17-dihydroxy-10,13-dimethyl-2,6,7,8,9,11,12,14,15,16-decahydro-1H-cyclopenta[a]phenanthren-3-one
20α-dihydrocortisone	C21H30O5	566-38-1	CHEBI_746885	C[C@]12CCC(=O)C=C1CC[C@@H]3[C@@H]2C(=O)C[C@]4([C@H]3CC[C@@]4([C@H](CO)O)O)C	InChI=1S/C21H30O5/c1-19-7-5-13(23)9-12(19)3-4-14-15-6-8-21(26,17(25)11-22)20(15,2)10-16(24)18(14)19/h9,14-15,17-18,22,25-26H,3-8,10-11H2,1-2H3/t14-,15-,17-,18+,19-,20-,21-/m0/s1	XBIDABJJGYNJTK-VDUMFTQRSA-N	151132	(8S,9S,10R,13S,14S,17R)-17-[(1S)-1,2-dihydroxyethyl]-17-hydroxy-10,13-dimethyl-1,2,6,7,8,9,12,14,15,16-decahydrocyclopenta[a]phenanthrene-3,11-dione
20α-dihydroprogesterone	C21H32O2	145-14-2	CHEBI_28453	C[C@@H]([C@H]1CC[C@@H]2[C@@]1(CC[C@H]3[C@H]2CCC4=CC(=O)CC[C@]34C)C)O	InChI=1S/C21H32O2/c1-13(22)17-6-7-18-16-5-4-14-12-15(23)8-10-20(14,2)19(16)9-11-21(17,18)3/h12-13,16-19,22H,4-11H2,1-3H3/t13-,16-,17+,18-,19-,20-,21+/m0/s1	RWBRUCCWZPSBFC-RXRZZTMXSA-N	8956	(8S,9S,10R,13S,14S,17S)-17-[(1S)-1-hydroxyethyl]-10,13-dimethyl-1,2,6,7,8,9,11,12,14,15,16,17-dodecahydrocyclopenta[a]phenanthren-3-one
20α-hydroxycholesterol	C27H46O2	516-72-3	CHEBI_1296	CC(C)CCC[C@@](C)([C@H]1CC[C@@H]2[C@@]1(CC[C@H]3[C@H]2CC=C4[C@@]3(CC[C@@H](C4)O)C)C)O	InChI=1S/C27H46O2/c1-18(2)7-6-14-27(5,29)24-11-10-22-21-9-8-19-17-20(28)12-15-25(19,3)23(21)13-16-26(22,24)4/h8,18,20-24,28-29H,6-7,9-17H2,1-5H3/t20-,21-,22-,23-,24-,25-,26-,27-/m0/s1	MCKLJFJEQRYRQT-APGJSSKUSA-N	121935	(3S,8S,9S,10R,13S,14S,17S)-17-[(2S)-2-hydroxy-6-methylheptan-2-yl]-10,13-dimethyl-2,3,4,7,8,9,11,12,14,15,16,17-dodecahydro-1H-cyclopenta[a]phenanthren-3-ol
20β-cortol	C21H36O5	667-65-2	CHEBI_89257	C[C@]12CC[C@H](C[C@H]1CC[C@@H]3[C@@H]2[C@H](C[C@]4([C@H]3CC[C@@]4([C@@H](CO)O)O)C)O)O	InChI=1S/C21H36O5/c1-19-7-5-13(23)9-12(19)3-4-14-15-6-8-21(26,17(25)11-22)20(15,2)10-16(24)18(14)19/h12-18,22-26H,3-11H2,1-2H3/t12-,13-,14+,15+,16+,17-,18-,19+,20+,21+/m1/s1	FFPUNPBUZDTHJI-ZFOKFBPFSA-N	246164	(3R,5R,8S,9S,10S,11S,13S,14S,17R)-17-[(1R)-1,2-dihydroxyethyl]-10,13-dimethyl-1,2,3,4,5,6,7,8,9,11,12,14,15,16-tetradecahydrocyclopenta[a]phenanthrene-3,11,17-triol
20β-cortolone	C21H34O5	667-66-3	CHEBI_175712	C[C@]12CC[C@H](C[C@H]1CC[C@@H]3[C@@H]2C(=O)C[C@]4([C@H]3CC[C@@]4([C@@H](CO)O)O)C)O	InChI=1S/C21H34O5/c1-19-7-5-13(23)9-12(19)3-4-14-15-6-8-21(26,17(25)11-22)20(15,2)10-16(24)18(14)19/h12-15,17-18,22-23,25-26H,3-11H2,1-2H3/t12-,13-,14+,15+,17-,18-,19+,20+,21+/m1/s1	JXCOSKURGJMQSG-AIEJOZITSA-N	245259	(3R,5R,8S,9S,10S,13S,14S,17R)-17-[(1R)-1,2-dihydroxyethyl]-3,17-dihydroxy-10,13-dimethyl-2,3,4,5,6,7,8,9,12,14,15,16-dodecahydro-1H-cyclopenta[a]phenanthren-11-one
20β-dihydrocortisol	C21H32O5	116-58-5	CHEBI_139311	C[C@]12CCC(=O)C=C1CC[C@@H]3[C@@H]2[C@H](C[C@]4([C@H]3CC[C@@]4([C@@H](CO)O)O)C)O	InChI=1S/C21H32O5/c1-19-7-5-13(23)9-12(19)3-4-14-15-6-8-21(26,17(25)11-22)20(15,2)10-16(24)18(14)19/h9,14-18,22,24-26H,3-8,10-11H2,1-2H3/t14-,15-,16-,17+,18+,19-,20-,21-/m0/s1	AWWCEQOCFFQUKS-LCGKLAOVSA-N	12150498	(8S,9S,10R,11S,13S,14S,17R)-17-[(1R)-1,2-dihydroxyethyl]-11,17-dihydroxy-10,13-dimethyl-2,6,7,8,9,11,12,14,15,16-decahydro-1H-cyclopenta[a]phenanthren-3-one
20β-dihydrocortisone	C21H30O5	116-59-6	CHEBI_178084	C[C@]12CCC(=O)C=C1CC[C@@H]3[C@@H]2C(=O)C[C@]4([C@H]3CC[C@@]4([C@@H](CO)O)O)C	InChI=1S/C21H30O5/c1-19-7-5-13(23)9-12(19)3-4-14-15-6-8-21(26,17(25)11-22)20(15,2)10-16(24)18(14)19/h9,14-15,17-18,22,25-26H,3-8,10-11H2,1-2H3/t14-,15-,17+,18+,19-,20-,21-/m0/s1	XBIDABJJGYNJTK-GNIMZFFESA-N	13367714	(8S,9S,10R,13S,14S,17R)-17-[(1R)-1,2-dihydroxyethyl]-17-hydroxy-10,13-dimethyl-1,2,6,7,8,9,12,14,15,16-decahydrocyclopenta[a]phenanthrene-3,11-dione
21-deoxycortisol	C21H30O4	641-77-0	CHEBI_28697	CC(=O)[C@]1(CC[C@@H]2[C@@]1(C[C@@H]([C@H]3[C@H]2CCC4=CC(=O)CC[C@]34C)O)C)O	InChI=1S/C21H30O4/c1-12(22)21(25)9-7-16-15-5-4-13-10-14(23)6-8-19(13,2)18(15)17(24)11-20(16,21)3/h10,15-18,24-25H,4-9,11H2,1-3H3/t15-,16-,17-,18+,19-,20-,21-/m0/s1	LCZBQMKVFQNSJR-UJPCIWJBSA-N	92827	(8S,9S,10R,11S,13S,14S,17R)-17-acetyl-11,17-dihydroxy-10,13-dimethyl-2,6,7,8,9,11,12,14,15,16-decahydro-1H-cyclopenta[a]phenanthren-3-one
21-hydroxypregnenolone	C21H32O3	1164-98-3	CHEBI_28043	C[C@]12CC[C@H]3[C@H]([C@@H]1CC[C@@H]2C(=O)CO)CC=C4[C@@]3(CC[C@@H](C4)O)C	InChI=1S/C21H32O3/c1-20-9-7-14(23)11-13(20)3-4-15-16-5-6-18(19(24)12-22)21(16,2)10-8-17(15)20/h3,14-18,22-23H,4-12H2,1-2H3/t14-,15-,16-,17-,18+,20-,21-/m0/s1	MOIQRAOBRXUWGN-WPWXJNKXSA-N	247020	2-hydroxy-1-[(3S,8S,9S,10R,13S,14S,17S)-3-hydroxy-10,13-dimethyl-2,3,4,7,8,9,11,12,14,15,16,17-dodecahydro-1H-cyclopenta[a]phenanthren-17-yl]ethanone
22α-hydroxycholesterol	C27H46O2	22348-64-7	CHEBI_1301	C[C@@H]([C@H]1CC[C@@H]2[C@@]1(CC[C@H]3[C@H]2CC=C4[C@@]3(CC[C@@H](C4)O)C)C)[C@H](CCC(C)C)O	InChI=1S/C27H46O2/c1-17(2)6-11-25(29)18(3)22-9-10-23-21-8-7-19-16-20(28)12-14-26(19,4)24(21)13-15-27(22,23)5/h7,17-18,20-25,28-29H,6,8-16H2,1-5H3/t18-,20-,21-,22+,23-,24-,25-,26-,27+/m0/s1	RZPAXNJLEKLXNO-QUOSNDFLSA-N	168038	(3S,8S,9S,10R,13S,14S,17R)-17-[(2S,3S)-3-hydroxy-6-methylheptan-2-yl]-10,13-dimethyl-2,3,4,7,8,9,11,12,14,15,16,17-dodecahydro-1H-cyclopenta[a]phenanthren-3-ol
2α-hydroxytestosterone	C19H28O3	4075-14-3	CHEBI_83025	C[C@]12CC[C@H]3[C@H]([C@@H]1CC[C@@H]2O)CCC4=CC(=O)[C@@H](C[C@]34C)O	InChI=1S/C19H28O3/c1-18-8-7-14-12(13(18)5-6-17(18)22)4-3-11-9-15(20)16(21)10-19(11,14)2/h9,12-14,16-17,21-22H,3-8,10H2,1-2H3/t12-,13-,14-,16+,17-,18-,19-/m0/s1	ZOIPFFUVGMVQGE-DTQPDNRZSA-N	14311666	(2R,8R,9S,10R,13S,14S,17S)-2,17-dihydroxy-10,13-dimethyl-1,2,6,7,8,9,11,12,14,15,16,17-dodecahydrocyclopenta[a]phenanthren-3-one
2β-hydroxytestosterone	C19H28O3	10390-14-4	CHEBI_137077	C[C@]12CC[C@H]3[C@H]([C@@H]1CC[C@@H]2O)CCC4=CC(=O)[C@H](C[C@]34C)O	InChI=1S/C19H28O3/c1-18-8-7-14-12(13(18)5-6-17(18)22)4-3-11-9-15(20)16(21)10-19(11,14)2/h9,12-14,16-17,21-22H,3-8,10H2,1-2H3/t12-,13-,14-,16-,17-,18-,19-/m0/s1	ZOIPFFUVGMVQGE-LXKHFVGGSA-N	14311667	(2S,8R,9S,10R,13S,14S,17S)-2,17-dihydroxy-10,13-dimethyl-1,2,6,7,8,9,11,12,14,15,16,17-dodecahydrocyclopenta[a]phenanthren-3-one
2-hydroxyestradiol	C18H24O3	362-05-0	CHEBI_28744	C[C@]12CC[C@H]3[C@H]([C@@H]1CC[C@@H]2O)CCC4=CC(=C(C=C34)O)O	InChI=1S/C18H24O3/c1-18-7-6-11-12(14(18)4-5-17(18)21)3-2-10-8-15(19)16(20)9-13(10)11/h8-9,11-12,14,17,19-21H,2-7H2,1H3/t11-,12+,14-,17-,18-/m0/s1	DILDHNKDVHLEQB-XSSYPUMDSA-N	247304	(8R,9S,13S,14S,17S)-13-methyl-6,7,8,9,11,12,14,15,16,17-decahydrocyclopenta[a]phenanthrene-2,3,17-triol
2-methoxyestradiol	C19H26O3	362-07-2	CHEBI_28955	C[C@]12CC[C@H]3[C@H]([C@@H]1CC[C@@H]2O)CCC4=CC(=C(C=C34)OC)O	InChI=1S/C19H26O3/c1-19-8-7-12-13(15(19)5-6-18(19)21)4-3-11-9-16(20)17(22-2)10-14(11)12/h9-10,12-13,15,18,20-21H,3-8H2,1-2H3/t12-,13+,15-,18-,19-/m0/s1	CQOQDQWUFQDJMK-SSTWWWIQSA-N	66414	(8R,9S,13S,14S,17S)-2-methoxy-13-methyl-6,7,8,9,11,12,14,15,16,17-decahydrocyclopenta[a]phenanthrene-3,17-diol
2-methoxyestrone	C19H24O3	362-08-3	CHEBI_1189	C[C@]12CC[C@H]3[C@H]([C@@H]1CCC2=O)CCC4=CC(=C(C=C34)OC)O	InChI=1S/C19H24O3/c1-19-8-7-12-13(15(19)5-6-18(19)21)4-3-11-9-16(20)17(22-2)10-14(11)12/h9-10,12-13,15,20H,3-8H2,1-2H3/t12-,13+,15-,19-/m0/s1	WHEUWNKSCXYKBU-QPWUGHHJSA-N	440624	(8R,9S,13S,14S)-3-hydroxy-2-methoxy-13-methyl-7,8,9,11,12,14,15,16-octahydro-6H-cyclopenta[a]phenanthren-17-one
3α,5α-tetrahydrocorticosterone	C21H34O4	600-63-5	CHEBI_89328	C[C@]12CC[C@H](C[C@@H]1CC[C@@H]3[C@@H]2[C@H](C[C@]4([C@H]3CC[C@@H]4C(=O)CO)C)O)O	InChI=1S/C21H34O4/c1-20-8-7-13(23)9-12(20)3-4-14-15-5-6-16(18(25)11-22)21(15,2)10-17(24)19(14)20/h12-17,19,22-24H,3-11H2,1-2H3/t12-,13+,14-,15-,16+,17-,19+,20-,21-/m0/s1	RHQQHZQUAMFINJ-NZTKVECHSA-N	101790	1-[(3R,5S,8S,9S,10S,11S,13S,14S,17S)-3,11-dihydroxy-10,13-dimethyl-2,3,4,5,6,7,8,9,11,12,14,15,16,17-tetradecahydro-1H-cyclopenta[a]phenanthren-17-yl]-2-hydroxyethanone
3α,5α-tetrahydrocortisol	C21H34O5	302-91-0	CHEBI_89627	C[C@]12CC[C@H](C[C@@H]1CC[C@@H]3[C@@H]2[C@H](C[C@]4([C@H]3CC[C@@]4(C(=O)CO)O)C)O)O	InChI=1S/C21H34O5/c1-19-7-5-13(23)9-12(19)3-4-14-15-6-8-21(26,17(25)11-22)20(15,2)10-16(24)18(14)19/h12-16,18,22-24,26H,3-11H2,1-2H3/t12-,13+,14-,15-,16-,18+,19-,20-,21-/m0/s1	AODPIQQILQLWGS-FDSHTENPSA-N	92748	2-hydroxy-1-[(3R,5S,8S,9S,10S,11S,13S,14S,17R)-3,11,17-trihydroxy-10,13-dimethyl-1,2,3,4,5,6,7,8,9,11,12,14,15,16-tetradecahydrocyclopenta[a]phenanthren-17-yl]ethanone
3α,5β-tetrahydroaldosterone	C21H32O5	13489-75-3	CHEBI_183482	C[C@]12CC[C@H](C[C@H]1CC[C@@H]3[C@@H]2[C@@H]4C[C@]5([C@H]3CC[C@@H]5C(=O)CO)[C@H](O4)O)O	InChI=1S/C21H32O5/c1-20-7-6-12(23)8-11(20)2-3-13-14-4-5-15(16(24)10-22)21(14)9-17(18(13)20)26-19(21)25/h11-15,17-19,22-23,25H,2-10H2,1H3/t11-,12-,13+,14+,15-,17+,18-,19+,20+,21-/m1/s1	JDEYOKPHRJVBQO-BMDKAXIVSA-N	71309808	1-[(1R,2S,5S,6S,9R,11R,14S,15S,16S,18S)-11,18-dihydroxy-14-methyl-17-oxapentacyclo[14.2.1.01,5.06,15.09,14]nonadecan-2-yl]-2-hydroxyethanone
3α,5β-tetrahydrocorticosterone	C21H34O4	68-42-8	CHEBI_9481	C[C@]12CC[C@H](C[C@H]1CC[C@@H]3[C@@H]2[C@H](C[C@]4([C@H]3CC[C@@H]4C(=O)CO)C)O)O	InChI=1S/C21H34O4/c1-20-8-7-13(23)9-12(20)3-4-14-15-5-6-16(18(25)11-22)21(15,2)10-17(24)19(14)20/h12-17,19,22-24H,3-11H2,1-2H3/t12-,13-,14+,15+,16-,17+,19-,20+,21+/m1/s1	RHQQHZQUAMFINJ-DTDWNVJFSA-N	65553	1-[(3R,5R,8S,9S,10S,11S,13S,14S,17S)-3,11-dihydroxy-10,13-dimethyl-2,3,4,5,6,7,8,9,11,12,14,15,16,17-tetradecahydro-1H-cyclopenta[a]phenanthren-17-yl]-2-hydroxyethanone
3α,5β-tetrahydrocortisol	C21H34O5	53-02-1	CHEBI_28320	C[C@]12CC[C@H](C[C@H]1CC[C@@H]3[C@@H]2[C@H](C[C@]4([C@H]3CC[C@@]4(C(=O)CO)O)C)O)O	InChI=1S/C21H34O5/c1-19-7-5-13(23)9-12(19)3-4-14-15-6-8-21(26,17(25)11-22)20(15,2)10-16(24)18(14)19/h12-16,18,22-24,26H,3-11H2,1-2H3/t12-,13-,14+,15+,16+,18-,19+,20+,21+/m1/s1	AODPIQQILQLWGS-GXBDJPPSSA-N	5864	2-hydroxy-1-[(3R,5R,8S,9S,10S,11S,13S,14S,17R)-3,11,17-trihydroxy-10,13-dimethyl-1,2,3,4,5,6,7,8,9,11,12,14,15,16-tetradecahydrocyclopenta[a]phenanthren-17-yl]ethanone
3α,5β-tetrahydrocortisone	C21H32O5	53-05-4	CHEBI_9901	C[C@]12CC[C@H](C[C@H]1CC[C@@H]3[C@@H]2C(=O)C[C@]4([C@H]3CC[C@@]4(C(=O)CO)O)C)O	InChI=1S/C21H32O5/c1-19-7-5-13(23)9-12(19)3-4-14-15-6-8-21(26,17(25)11-22)20(15,2)10-16(24)18(14)19/h12-15,18,22-23,26H,3-11H2,1-2H3/t12-,13-,14+,15+,18-,19+,20+,21+/m1/s1	SYGWGHVTLUBCEM-ZIZPXRJBSA-N	5866	(3R,5R,8S,9S,10S,13S,14S,17R)-3,17-dihydroxy-17-(2-hydroxyacetyl)-10,13-dimethyl-2,3,4,5,6,7,8,9,12,14,15,16-dodecahydro-1H-cyclopenta[a]phenanthren-11-one
3β,5α,6β-trihydroxycholestane	C27H48O3	1253-84-5	CHEBI_28082	C[C@H](CCCC(C)C)[C@H]1CC[C@@H]2[C@@]1(CC[C@H]3[C@H]2C[C@H]([C@@]4([C@@]3(CC[C@@H](C4)O)C)O)O)C	InChI=1S/C27H48O3/c1-17(2)7-6-8-18(3)21-9-10-22-20-15-24(29)27(30)16-19(28)11-14-26(27,5)23(20)12-13-25(21,22)4/h17-24,28-30H,6-16H2,1-5H3/t18-,19+,20+,21-,22+,23+,24-,25-,26-,27+/m1/s1	YMMFNKXZULYSOQ-RUXQDQFYSA-N	91498	(3S,5R,6R,8S,9S,10R,13R,14S,17R)-10,13-dimethyl-17-[(2R)-6-methylheptan-2-yl]-1,2,3,4,6,7,8,9,11,12,14,15,16,17-tetradecahydrocyclopenta[a]phenanthrene-3,5,6-triol
4-hydroxyestradiol	C18H24O3	5976-61-4	CHEBI_62845	C[C@]12CC[C@H]3[C@H]([C@@H]1CC[C@@H]2O)CCC4=C3C=CC(=C4O)O	InChI=1S/C18H24O3/c1-18-9-8-11-10-4-6-15(19)17(21)13(10)3-2-12(11)14(18)5-7-16(18)20/h4,6,11-12,14,16,19-21H,2-3,5,7-9H2,1H3/t11-,12-,14+,16+,18+/m1/s1	QOZFCKXEVSGWGS-ZHIYBZGJSA-N	5282360	(8R,9S,13S,14S,17S)-13-methyl-6,7,8,9,11,12,14,15,16,17-decahydrocyclopenta[a]phenanthrene-3,4,17-triol
4-hydroxyestrone	C18H22O3	3131-23-5	CHEBI_87602	C[C@]12CC[C@H]3[C@H]([C@@H]1CCC2=O)CCC4=C3C=CC(=C4O)O	InChI=1S/C18H22O3/c1-18-9-8-11-10-4-6-15(19)17(21)13(10)3-2-12(11)14(18)5-7-16(18)20/h4,6,11-12,14,19,21H,2-3,5,7-9H2,1H3/t11-,12-,14+,18+/m1/s1	XQZVQQZZOVBNLU-QDTBLXIISA-N	9971251	(8R,9S,13S,14S)-3,4-dihydroxy-13-methyl-7,8,9,11,12,14,15,16-octahydro-6H-cyclopenta[a]phenanthren-17-one
4-methoxyestradiol	C19H26O3	26788-23-8	CHEBI_136975	C[C@]12CC[C@H]3[C@H]([C@@H]1CC[C@@H]2O)CCC4=C3C=CC(=C4OC)O	InChI=1S/C19H26O3/c1-19-10-9-12-11-5-7-16(20)18(22-2)14(11)4-3-13(12)15(19)6-8-17(19)21/h5,7,12-13,15,17,20-21H,3-4,6,8-10H2,1-2H3/t12-,13-,15+,17+,19+/m1/s1	BCWZIZLVBYHFES-PYEWSWHRSA-N	68578	(8R,9S,13S,14S,17S)-4-methoxy-13-methyl-6,7,8,9,11,12,14,15,16,17-decahydrocyclopenta[a]phenanthrene-3,17-diol
4-methoxyestrone	C19H24O3	58562-33-7	CHEBI_136972	C[C@]12CC[C@H]3[C@H]([C@@H]1CCC2=O)CCC4=C3C=CC(=C4OC)O	InChI=1S/C19H24O3/c1-19-10-9-12-11-5-7-16(20)18(22-2)14(11)4-3-13(12)15(19)6-8-17(19)21/h5,7,12-13,15,20H,3-4,6,8-10H2,1-2H3/t12-,13-,15+,19+/m1/s1	PUEXVLNGOBYUEW-BFDPJXHCSA-N	194066	(8R,9S,13S,14S)-3-hydroxy-4-methoxy-13-methyl-7,8,9,11,12,14,15,16-octahydro-6H-cyclopenta[a]phenanthren-17-one
5α,20α-tetrahydroprogesterone	C21H34O2	516-59-6	CHEBI_81469	C[C@@H]([C@H]1CC[C@@H]2[C@@]1(CC[C@H]3[C@H]2CC[C@@H]4[C@@]3(CCC(=O)C4)C)C)O	InChI=1S/C21H34O2/c1-13(22)17-6-7-18-16-5-4-14-12-15(23)8-10-20(14,2)19(16)9-11-21(17,18)3/h13-14,16-19,22H,4-12H2,1-3H3/t13-,14-,16-,17+,18-,19-,20-,21+/m0/s1	DYVGYXXLXQESJE-SKLBOBKVSA-N	3080558	(5S,8R,9S,10S,13S,14S,17S)-17-[(1S)-1-hydroxyethyl]-10,13-dimethyl-1,2,4,5,6,7,8,9,11,12,14,15,16,17-tetradecahydrocyclopenta[a]phenanthren-3-one
5α,6α-epoxycholesterol	C27H46O2	1250-95-9	CHEBI_49305	C[C@H](CCCC(C)C)[C@H]1CC[C@@H]2[C@@]1(CC[C@H]3[C@H]2C[C@H]4[C@@]5([C@@]3(CC[C@@H](C5)O)C)O4)C	InChI=1S/C27H46O2/c1-17(2)7-6-8-18(3)21-9-10-22-20-15-24-27(29-24)16-19(28)11-14-26(27,5)23(20)12-13-25(21,22)4/h17-24,28H,6-16H2,1-5H3/t18-,19+,20+,21-,22+,23+,24+,25-,26-,27+/m1/s1	PRYIJAGAEJZDBO-ZEQHCUNVSA-N	227037	(1S,2R,5S,7R,9S,11S,12S,15R,16R)-2,16-dimethyl-15-[(2R)-6-methylheptan-2-yl]-8-oxapentacyclo[9.7.0.02,7.07,9.012,16]octadecan-5-ol
5α-androstane-3α,17β-diol	C19H32O2	1852-53-5	CHEBI_36713	[C@H]1(CC[C@]2([C@H](C1)CC[C@H]1[C@@H]3CC[C@@H]([C@@]3(C)CC[C@H]21)O)C)O	InChI=1S/C19H32O2/c1-18-9-7-13(20)11-12(18)3-4-14-15-5-6-17(21)19(15,2)10-8-16(14)18/h12-17,20-21H,3-11H2,1-2H3/t12-,13+,14-,15-,16-,17-,18-,19-/m0/s1	CBMYJHIOYJEBSB-KHOSGYARSA-N	15818	(3R,5S,8R,9S,10S,13S,14S,17S)-10,13-dimethyl-2,3,4,5,6,7,8,9,11,12,14,15,16,17-tetradecahydro-1H-cyclopenta[a]phenanthrene-3,17-diol
5α-androstane-3β,12β,15α-triol	C19H32O3	23130-16-7	CHEBI_746887	C[C@]12CC[C@@](O)([H])C[C@]1([H])CC[C@]3([H])[C@]2([H])C[C@](O)([H])[C@@]4(CC[C@@](O)([H])[C@@]34[H])C	InChI=1S/C19H32O3/c1-18-7-5-12(20)9-11(18)3-4-13-14(18)10-16(22)19(2)8-6-15(21)17(13)19/h11-17,20-22H,3-10H2,1-2H3/t11-,12-,13+,14-,15-,16+,17+,18-,19-/m0/s1	IGDPHSMKMOOQGM-RBRZPYPVSA-N	99601768	(3S,5S,8R,9S,10S,12R,13R,14S,15S)-10,13-dimethyl-2,3,4,5,6,7,8,9,11,12,14,15,16,17-tetradecahydro-1H-cyclopenta[a]phenanthrene-3,12,15-triol
5α-androstane-3β,7α,16β-triol	C19H32O3	49643-73-4	CHEBI_746888	C[C@]12CC[C@H]3[C@H]([C@@H]1C[C@@H](C2)O)[C@@H](C[C@@H]4[C@@]3(CC[C@@H](C4)O)C)O	InChI=1S/C19H32O3/c1-18-5-4-14-17(15(18)9-13(21)10-18)16(22)8-11-7-12(20)3-6-19(11,14)2/h11-17,20-22H,3-10H2,1-2H3/t11-,12+,13+,14+,15+,16-,17-,18-,19+/m1/s1	NJFDVXNNCYQDEC-PDWFGAFOSA-N	99574281	(3S,5R,7R,8S,9S,10S,13R,14S,16S)-10,13-dimethyl-2,3,4,5,6,7,8,9,11,12,14,15,16,17-tetradecahydro-1H-cyclopenta[a]phenanthrene-3,7,16-triol
5α-androstane-3β-ol-7,17-dione	C19H28O3	49643-99-4	CHEBI_79834	C[C@]12CC[C@@H](C[C@@H]1CC(=O)[C@@H]3[C@@H]2CC[C@]4([C@H]3CCC4=O)C)O	InChI=1S/C19H28O3/c1-18-7-5-12(20)9-11(18)10-15(21)17-13-3-4-16(22)19(13,2)8-6-14(17)18/h11-14,17,20H,3-10H2,1-2H3/t11-,12+,13+,14+,17+,18+,19+/m1/s1	ONVVZSHYQMOXLN-ZVMDJWLLSA-N	11954160	(3S,5R,8R,9S,10S,13S,14S)-3-hydroxy-10,13-dimethyl-2,3,4,5,6,8,9,11,12,14,15,16-dodecahydro-1H-cyclopenta[a]phenanthrene-7,17-dione
5α-androstanedione	C19H28O2	846-46-8	CHEBI_15994	C[C@]12CCC(=O)C[C@@H]1CC[C@@H]3[C@@H]2CC[C@]4([C@H]3CCC4=O)C	InChI=1S/C19H28O2/c1-18-9-7-13(20)11-12(18)3-4-14-15-5-6-17(21)19(15,2)10-8-16(14)18/h12,14-16H,3-11H2,1-2H3/t12-,14-,15-,16-,18-,19-/m0/s1	RAJWOBJTTGJROA-WZNAKSSCSA-N	222865	(5S,8R,9S,10S,13S,14S)-10,13-dimethyl-2,4,5,6,7,8,9,11,12,14,15,16-dodecahydro-1H-cyclopenta[a]phenanthrene-3,17-dione
5α-dihydro-11-deoxycorticosterone	C21H32O3	298-36-2	CHEBI_81468	C[C@]12CCC(=O)C[C@@H]1CC[C@@H]3[C@@H]2CC[C@]4([C@H]3CC[C@@H]4C(=O)CO)C	InChI=1S/C21H32O3/c1-20-9-7-14(23)11-13(20)3-4-15-16-5-6-18(19(24)12-22)21(16,2)10-8-17(15)20/h13,15-18,22H,3-12H2,1-2H3/t13-,15-,16-,17-,18+,20-,21-/m0/s1	USPYDUPOCUYHQL-KVHKMPIWSA-N	6451493	(5S,8R,9S,10S,13S,14S,17S)-17-(2-hydroxyacetyl)-10,13-dimethyl-1,2,4,5,6,7,8,9,11,12,14,15,16,17-tetradecahydrocyclopenta[a]phenanthren-3-one
5α-dihydrocorticosterone	C21H32O4	298-25-9	CHEBI_180474	C[C@]12CCC(=O)C[C@@H]1CC[C@@H]3[C@@H]2[C@H](C[C@]4([C@H]3CC[C@@H]4C(=O)CO)C)O	InChI=1S/C21H32O4/c1-20-8-7-13(23)9-12(20)3-4-14-15-5-6-16(18(25)11-22)21(15,2)10-17(24)19(14)20/h12,14-17,19,22,24H,3-11H2,1-2H3/t12-,14-,15-,16+,17-,19+,20-,21-/m0/s1	CTTOFMJLOGMZRN-DYWNTJRHSA-N	3080546	(5S,8S,9S,10S,11S,13S,14S,17S)-11-hydroxy-17-(2-hydroxyacetyl)-10,13-dimethyl-1,2,4,5,6,7,8,9,11,12,14,15,16,17-tetradecahydrocyclopenta[a]phenanthren-3-one
5α-dihydrocortisol	C21H32O5	516-41-6	CHEBI_167505	C[C@]12CCC(=O)C[C@@H]1CC[C@@H]3[C@@H]2[C@H](C[C@]4([C@H]3CC[C@@]4(C(=O)CO)O)C)O	InChI=1S/C21H32O5/c1-19-7-5-13(23)9-12(19)3-4-14-15-6-8-21(26,17(25)11-22)20(15,2)10-16(24)18(14)19/h12,14-16,18,22,24,26H,3-11H2,1-2H3/t12-,14-,15-,16-,18+,19-,20-,21-/m0/s1	ACSFOIGNUQUIGE-SERXDUEGSA-N	12816693	(5S,8S,9S,10S,11S,13S,14S,17R)-11,17-dihydroxy-17-(2-hydroxyacetyl)-10,13-dimethyl-2,4,5,6,7,8,9,11,12,14,15,16-dodecahydro-1H-cyclopenta[a]phenanthren-3-one
5α-dihydrocortisone	C21H30O5	1482-51-5	CHEBI_16372	C[C@]12CCC(=O)C[C@@H]1CC[C@@H]3[C@@H]2C(=O)C[C@]4([C@H]3CC[C@@]4(C(=O)CO)O)C	InChI=1S/C21H30O5/c1-19-7-5-13(23)9-12(19)3-4-14-15-6-8-21(26,17(25)11-22)20(15,2)10-16(24)18(14)19/h12,14-15,18,22,26H,3-11H2,1-2H3/t12-,14-,15-,18+,19-,20-,21-/m0/s1	YCLWEYIBFOLMEM-FZPGBCFJSA-N	440054	(5S,8S,9S,10S,13S,14S,17R)-17-hydroxy-17-(2-hydroxyacetyl)-10,13-dimethyl-1,2,4,5,6,7,8,9,12,14,15,16-dodecahydrocyclopenta[a]phenanthrene-3,11-dione
5α-dihydroprogesterone	C21H32O2	566-65-4	CHEBI_28952	CC(=O)[C@H]1CC[C@@H]2[C@@]1(CC[C@H]3[C@H]2CC[C@@H]4[C@@]3(CCC(=O)C4)C)C	InChI=1S/C21H32O2/c1-13(22)17-6-7-18-16-5-4-14-12-15(23)8-10-20(14,2)19(16)9-11-21(17,18)3/h14,16-19H,4-12H2,1-3H3/t14-,16-,17+,18-,19-,20-,21+/m0/s1	XMRPGKVKISIQBV-BJMCWZGWSA-N	92810	(5S,8R,9S,10S,13S,14S,17S)-17-acetyl-10,13-dimethyl-1,2,4,5,6,7,8,9,11,12,14,15,16,17-tetradecahydrocyclopenta[a]phenanthren-3-one
5α-dihydrotestosterone	C19H30O2	521-18-6	CHEBI_16330	C[C@]12CCC(=O)C[C@@H]1CC[C@@H]3[C@@H]2CC[C@]4([C@H]3CC[C@@H]4O)C	InChI=1S/C19H30O2/c1-18-9-7-13(20)11-12(18)3-4-14-15-5-6-17(21)19(15,2)10-8-16(14)18/h12,14-17,21H,3-11H2,1-2H3/t12-,14-,15-,16-,17-,18-,19-/m0/s1	NVKAWKQGWWIWPM-ABEVXSGRSA-N	10635	(5S,8R,9S,10S,13S,14S,17S)-17-hydroxy-10,13-dimethyl-1,2,4,5,6,7,8,9,11,12,14,15,16,17-tetradecahydrocyclopenta[a]phenanthren-3-one
5α-dihydrotestosterone 13C3	C19H30O2	1257527-54-0		C[C@@]12[C@@]3([C@]([C@]4([C@](C)(CC3)[C@@H](O)CC4)[H])(CC[C@]1([13CH2][13C](=O)[13CH2]C2)[H])[H])[H]	InChI=1S/C19H30O2/c1-18-9-7-13(20)11-12(18)3-4-14-15-5-6-17(21)19(15,2)10-8-16(14)18/h12,14-17,21H,3-11H2,1-2H3/t12-,14-,15-,16-,17-,18-,19-/m0/s1/i7+1,11+1,13+1	NVKAWKQGWWIWPM-PUXGIKSBSA-N	71309682	(5S,8R,9S,10S,13S,14S,17S)-17-hydroxy-10,13-dimethyl-1,2,4,5,6,7,8,9,11,12,14,15,16,17-tetradecahydrocyclopenta[a]phenanthren-3-one
5α-dihydrotestosterone 17β-Glucuronide	C25H38O8	42037-24-1	CHEBI_89417	C[C@]12CCC(=O)C[C@@H]1CC[C@@H]3[C@@H]2CC[C@]4([C@H]3CC[C@@H]4O[C@H]5[C@@H]([C@H]([C@@H]([C@H](O5)C(=O)O)O)O)O)C	InChI=1S/C25H38O8/c1-24-9-7-13(26)11-12(24)3-4-14-15-5-6-17(25(15,2)10-8-16(14)24)32-23-20(29)18(27)19(28)21(33-23)22(30)31/h12,14-21,23,27-29H,3-11H2,1-2H3,(H,30,31)/t12-,14-,15-,16-,17-,18-,19-,20+,21-,23+,24-,25-/m0/s1	CLQMBSSRTBUNDV-CPKOJWPQSA-N	44263365	(2S,3S,4S,5R,6R)-6-[[(5S,8R,9S,10S,13S,14S,17S)-10,13-dimethyl-3-oxo-1,2,4,5,6,7,8,9,11,12,14,15,16,17-tetradecahydrocyclopenta[a]phenanthren-17-yl]oxy]-3,4,5-trihydroxyoxane-2-carboxylic acid
5β,6β-epoxycholesterol	C27H46O2	4025-59-6	CHEBI_28164	C[C@H](CCCC(C)C)[C@H]1CC[C@@H]2[C@@]1(CC[C@H]3[C@H]2C[C@@H]4[C@]5([C@@]3(CC[C@@H](C5)O)C)O4)C	InChI=1S/C27H46O2/c1-17(2)7-6-8-18(3)21-9-10-22-20-15-24-27(29-24)16-19(28)11-14-26(27,5)23(20)12-13-25(21,22)4/h17-24,28H,6-16H2,1-5H3/t18-,19+,20+,21-,22+,23+,24-,25-,26-,27-/m1/s1	PRYIJAGAEJZDBO-DTLXENBRSA-N	108109	(1S,2R,5S,7S,9R,11S,12S,15R,16R)-2,16-dimethyl-15-[(2R)-6-methylheptan-2-yl]-8-oxapentacyclo[9.7.0.02,7.07,9.012,16]octadecan-5-ol
5β-Androstane-3β,17α-diol	C19H32O2	19767-69-2	CHEBI_746890	C[C@@]12[C@@]3([C@]([C@]4([C@](C)(CC3)[C@H](O)CC4)[H])(CC[C@@]1(C[C@@H](O)CC2)[H])[H])[H]	InChI=1S/C19H32O2/c1-18-9-7-13(20)11-12(18)3-4-14-15-5-6-17(21)19(15,2)10-8-16(14)18/h12-17,20-21H,3-11H2,1-2H3/t12-,13+,14+,15+,16+,17-,18+,19+/m1/s1	CBMYJHIOYJEBSB-YISWTCPOSA-N	9857253	(3S,5R,8R,9S,10S,13S,14S,17R)-10,13-dimethyl-2,3,4,5,6,7,8,9,11,12,14,15,16,17-tetradecahydro-1H-cyclopenta[a]phenanthrene-3,17-diol
5β-Androstane-3β,17β-diol	C19H32O2	6038-31-9	CHEBI_36715	C[C@]12CC[C@@H](C[C@H]1CC[C@@H]3[C@@H]2CC[C@]4([C@H]3CC[C@@H]4O)C)O	InChI=1S/C19H32O2/c1-18-9-7-13(20)11-12(18)3-4-14-15-5-6-17(21)19(15,2)10-8-16(14)18/h12-17,20-21H,3-11H2,1-2H3/t12-,13+,14+,15+,16+,17+,18+,19+/m1/s1	CBMYJHIOYJEBSB-VXZRPZIYSA-N	9922115	(3S,5R,8R,9S,10S,13S,14S,17S)-10,13-dimethyl-2,3,4,5,6,7,8,9,11,12,14,15,16,17-tetradecahydro-1H-cyclopenta[a]phenanthrene-3,17-diol
5β-dihydro-11-dehydrocorticosterone	C21H30O4	10417-86-4	CHEBI_746891	C1CC(=O)C[C@@H]2[C@]1([C@@H]1[C@@H](CC2)[C@H]2[C@](CC1=O)([C@H](CC2)C(=O)CO)C)C	InChI=1S/C21H30O4/c1-20-8-7-13(23)9-12(20)3-4-14-15-5-6-16(18(25)11-22)21(15,2)10-17(24)19(14)20/h12,14-16,19,22H,3-11H2,1-2H3/t12-,14+,15+,16-,19-,20+,21+/m1/s1	ZDUVZJUTJOBJHS-XYEQKYNMSA-N	254632	(5R,8S,9S,10S,13S,14S,17S)-17-(2-hydroxyacetyl)-10,13-dimethyl-2,4,5,6,7,8,9,12,14,15,16,17-dodecahydro-1H-cyclopenta[a]phenanthrene-3,11-dione
5β-dihydrocorticosterone	C21H32O4	566-01-8	CHEBI_86381	C[C@]12CCC(=O)C[C@H]1CC[C@@H]3[C@@H]2[C@H](C[C@]4([C@H]3CC[C@@H]4C(=O)CO)C)O	InChI=1S/C21H32O4/c1-20-8-7-13(23)9-12(20)3-4-14-15-5-6-16(18(25)11-22)21(15,2)10-17(24)19(14)20/h12,14-17,19,22,24H,3-11H2,1-2H3/t12-,14+,15+,16-,17+,19-,20+,21+/m1/s1	CTTOFMJLOGMZRN-BBWLNIHDSA-N	21145110	(5R,8S,9S,10S,11S,13S,14S,17S)-11-hydroxy-17-(2-hydroxyacetyl)-10,13-dimethyl-1,2,4,5,6,7,8,9,11,12,14,15,16,17-tetradecahydrocyclopenta[a]phenanthren-3-one
5β-dihydrocortisol	C21H32O5	1482-50-4	CHEBI_732	C[C@]12CCC(=O)C[C@H]1CC[C@@H]3[C@@H]2[C@H](C[C@]4([C@H]3CC[C@@]4(C(=O)CO)O)C)O	InChI=1S/C21H32O5/c1-19-7-5-13(23)9-12(19)3-4-14-15-6-8-21(26,17(25)11-22)20(15,2)10-16(24)18(14)19/h12,14-16,18,22,24,26H,3-11H2,1-2H3/t12-,14+,15+,16+,18-,19+,20+,21+/m1/s1	ACSFOIGNUQUIGE-AIPUTVCKSA-N	164838	(5R,8S,9S,10S,11S,13S,14S,17R)-11,17-dihydroxy-17-(2-hydroxyacetyl)-10,13-dimethyl-2,4,5,6,7,8,9,11,12,14,15,16-dodecahydro-1H-cyclopenta[a]phenanthren-3-one
5β-dihydrocortisone	C21H30O5	68-54-2	CHEBI_18093	C[C@]12CCC(=O)C[C@H]1CC[C@@H]3[C@@H]2C(=O)C[C@]4([C@H]3CC[C@@]4(C(=O)CO)O)C	InChI=1S/C21H30O5/c1-19-7-5-13(23)9-12(19)3-4-14-15-6-8-21(26,17(25)11-22)20(15,2)10-16(24)18(14)19/h12,14-15,18,22,26H,3-11H2,1-2H3/t12-,14+,15+,18-,19+,20+,21+/m1/s1	YCLWEYIBFOLMEM-FNLRALKVSA-N	65554	(5R,8S,9S,10S,13S,14S,17R)-17-hydroxy-17-(2-hydroxyacetyl)-10,13-dimethyl-1,2,4,5,6,7,8,9,12,14,15,16-dodecahydrocyclopenta[a]phenanthrene-3,11-dione
5β-dihydroprogesterone	C21H32O2	128-23-4	CHEBI_30154	CC(=O)[C@H]1CC[C@@H]2[C@@]1(CC[C@H]3[C@H]2CC[C@H]4[C@@]3(CCC(=O)C4)C)C	InChI=1S/C21H32O2/c1-13(22)17-6-7-18-16-5-4-14-12-15(23)8-10-20(14,2)19(16)9-11-21(17,18)3/h14,16-19H,4-12H2,1-3H3/t14-,16+,17-,18+,19+,20+,21-/m1/s1	XMRPGKVKISIQBV-XWOJZHJZSA-N	92745	(5R,8R,9S,10S,13S,14S,17S)-17-acetyl-10,13-dimethyl-1,2,4,5,6,7,8,9,11,12,14,15,16,17-tetradecahydrocyclopenta[a]phenanthren-3-one
5β-dihydrotestosterone	C19H30O2	571-22-2	CHEBI_2150	C[C@]12CCC(=O)C[C@H]1CC[C@@H]3[C@@H]2CC[C@]4([C@H]3CC[C@@H]4O)C	InChI=1S/C19H30O2/c1-18-9-7-13(20)11-12(18)3-4-14-15-5-6-17(21)19(15,2)10-8-16(14)18/h12,14-17,21H,3-11H2,1-2H3/t12-,14+,15+,16+,17+,18+,19+/m1/s1	NVKAWKQGWWIWPM-MISPCMORSA-N	11302	(5R,8R,9S,10S,13S,14S,17S)-17-hydroxy-10,13-dimethyl-1,2,4,5,6,7,8,9,11,12,14,15,16,17-tetradecahydrocyclopenta[a]phenanthren-3-one
6α-hydroxycortisol	C21H30O6	2242-98-0	CHEBI_79793	C[C@]12CCC(=O)C=C1[C@H](C[C@@H]3[C@@H]2[C@H](C[C@]4([C@H]3CC[C@@]4(C(=O)CO)O)C)O)O	InChI=1S/C21H30O6/c1-19-5-3-11(23)7-14(19)15(24)8-12-13-4-6-21(27,17(26)10-22)20(13,2)9-16(25)18(12)19/h7,12-13,15-16,18,22,24-25,27H,3-6,8-10H2,1-2H3/t12-,13-,15-,16-,18+,19-,20-,21-/m0/s1	GNFTWPCIRXSCQF-HVIRSNARSA-N	254633	(6S,8S,9S,10R,11S,13S,14S,17R)-6,11,17-trihydroxy-17-(2-hydroxyacetyl)-10,13-dimethyl-2,6,7,8,9,11,12,14,15,16-decahydro-1H-cyclopenta[a]phenanthren-3-one
6α-hydroxypregnanolone	C21H34O3	570-78-5	CHEBI_34355	CC(=O)[C@H]1CC[C@@H]2[C@@]1(CC[C@H]3[C@H]2C[C@@H]([C@H]4[C@@]3(CC[C@H](C4)O)C)O)C	InChI=1S/C21H34O3/c1-12(22)15-4-5-16-14-11-19(24)18-10-13(23)6-8-21(18,3)17(14)7-9-20(15,16)2/h13-19,23-24H,4-11H2,1-3H3/t13-,14+,15-,16+,17+,18+,19+,20-,21-/m1/s1	HHUZGDMRRLQZIQ-PXWUZWBYSA-N	101774	1-[(3R,5R,6S,8R,9S,10R,13S,14S,17S)-3,6-dihydroxy-10,13-dimethyl-2,3,4,5,6,7,8,9,11,12,14,15,16,17-tetradecahydro-1H-cyclopenta[a]phenanthren-17-yl]ethanone
6α-hydroxyprogesterone	C21H30O3	604-20-6	CHEBI_746892	CC(=O)[C@H]1CC[C@@H]2[C@@]1(CC[C@H]3[C@H]2C[C@@H](C4=CC(=O)CC[C@]34C)O)C	InChI=1S/C21H30O3/c1-12(22)15-4-5-16-14-11-19(24)18-10-13(23)6-8-21(18,3)17(14)7-9-20(15,16)2/h10,14-17,19,24H,4-9,11H2,1-3H3/t14-,15+,16-,17-,19-,20+,21+/m0/s1	PWCLWZOSAFOXFL-ADDDSGAWSA-N	23239832	(6S,8S,9S,10R,13S,14S,17S)-17-acetyl-6-hydroxy-10,13-dimethyl-1,2,6,7,8,9,11,12,14,15,16,17-dodecahydrocyclopenta[a]phenanthren-3-one
6α-hydroxytestosterone	C19H28O3	2944-87-8	CHEBI_746894	C[C@]12CC[C@H]3[C@H]([C@@H]1CC[C@@H]2O)C[C@@H](C4=CC(=O)CC[C@]34C)O	InChI=1S/C19H28O3/c1-18-7-5-11(20)9-15(18)16(21)10-12-13-3-4-17(22)19(13,2)8-6-14(12)18/h9,12-14,16-17,21-22H,3-8,10H2,1-2H3/t12-,13-,14-,16-,17-,18+,19-/m0/s1	XSEGWEUVSZRCBC-QXROXWLYSA-N	12073407	(6S,8R,9S,10R,13S,14S,17S)-6,17-dihydroxy-10,13-dimethyl-1,2,6,7,8,9,11,12,14,15,16,17-dodecahydrocyclopenta[a]phenanthren-3-one
6β-hydroxycortisol	C21H30O6	53-35-0	CHEBI_139271	C[C@]12CCC(=O)C=C1[C@@H](C[C@@H]3[C@@H]2[C@H](C[C@]4([C@H]3CC[C@@]4(C(=O)CO)O)C)O)O	InChI=1S/C21H30O6/c1-19-5-3-11(23)7-14(19)15(24)8-12-13-4-6-21(27,17(26)10-22)20(13,2)9-16(25)18(12)19/h7,12-13,15-16,18,22,24-25,27H,3-6,8-10H2,1-2H3/t12-,13-,15+,16-,18+,19-,20-,21-/m0/s1	GNFTWPCIRXSCQF-UJXAPRPESA-N	6852390	(6R,8S,9S,10R,11S,13S,14S,17R)-6,11,17-trihydroxy-17-(2-hydroxyacetyl)-10,13-dimethyl-2,6,7,8,9,11,12,14,15,16-decahydro-1H-cyclopenta[a]phenanthren-3-one
6β-hydroxyprogesterone	C21H30O3	604-19-3	CHEBI_62117	CC(=O)[C@H]1CC[C@@H]2[C@@]1(CC[C@H]3[C@H]2C[C@H](C4=CC(=O)CC[C@]34C)O)C	InChI=1S/C21H30O3/c1-12(22)15-4-5-16-14-11-19(24)18-10-13(23)6-8-21(18,3)17(14)7-9-20(15,16)2/h10,14-17,19,24H,4-9,11H2,1-3H3/t14-,15+,16-,17-,19+,20+,21+/m0/s1	PWCLWZOSAFOXFL-CXICGXRGSA-N	200149	(6R,8S,9S,10R,13S,14S,17S)-17-acetyl-6-hydroxy-10,13-dimethyl-1,2,6,7,8,9,11,12,14,15,16,17-dodecahydrocyclopenta[a]phenanthren-3-one
7α-hydroxyandrostenedione	C19H26O3	62-84-0	CHEBI_27768	C[C@]12CC[C@H]3[C@H]([C@@H]1CCC2=O)[C@@H](CC4=CC(=O)CC[C@]34C)O	InChI=1S/C19H26O3/c1-18-7-5-12(20)9-11(18)10-15(21)17-13-3-4-16(22)19(13,2)8-6-14(17)18/h9,13-15,17,21H,3-8,10H2,1-2H3/t13-,14-,15+,17-,18-,19-/m0/s1	LFWLQMQUJQUZBD-TYHLISGHSA-N	65542	(7R,8R,9S,10R,13S,14S)-7-hydroxy-10,13-dimethyl-2,6,7,8,9,11,12,14,15,16-decahydro-1H-cyclopenta[a]phenanthrene-3,17-dione
7α-hydroxycholesterol	C27H46O2	566-26-7	CHEBI_17500	C[C@H](CCCC(C)C)[C@H]1CC[C@@H]2[C@@]1(CC[C@H]3[C@H]2[C@@H](C=C4[C@@]3(CC[C@@H](C4)O)C)O)C	InChI=1S/C27H46O2/c1-17(2)7-6-8-18(3)21-9-10-22-25-23(12-14-27(21,22)5)26(4)13-11-20(28)15-19(26)16-24(25)29/h16-18,20-25,28-29H,6-15H2,1-5H3/t18-,20+,21-,22+,23+,24-,25+,26+,27-/m1/s1	OYXZMSRRJOYLLO-RVOWOUOISA-N	107722	(3S,7S,8S,9S,10R,13R,14S,17R)-10,13-dimethyl-17-[(2R)-6-methylheptan-2-yl]-2,3,4,7,8,9,11,12,14,15,16,17-dodecahydro-1H-cyclopenta[a]phenanthrene-3,7-diol
7α-hydroxy-DHEA	C19H28O3	53-00-9	CHEBI_81471	C[C@]12CC[C@H]3[C@H]([C@@H]1CCC2=O)[C@@H](C=C4[C@@]3(CC[C@@H](C4)O)C)O	InChI=1S/C19H28O3/c1-18-7-5-12(20)9-11(18)10-15(21)17-13-3-4-16(22)19(13,2)8-6-14(17)18/h10,12-15,17,20-21H,3-9H2,1-2H3/t12-,13-,14-,15+,17-,18-,19-/m0/s1	OLPSAOWBSPXZEA-JIEICEMKSA-N	65517	(3S,7S,8R,9S,10R,13S,14S)-3,7-dihydroxy-10,13-dimethyl-1,2,3,4,7,8,9,11,12,14,15,16-dodecahydrocyclopenta[a]phenanthren-17-one
7α-hydroxypregnenolone	C21H32O3	30626-96-1	CHEBI_81467	CC(=O)[C@H]1CC[C@@H]2[C@@]1(CC[C@H]3[C@H]2[C@@H](C=C4[C@@]3(CC[C@@H](C4)O)C)O)C	InChI=1S/C21H32O3/c1-12(22)15-4-5-16-19-17(7-9-21(15,16)3)20(2)8-6-14(23)10-13(20)11-18(19)24/h11,14-19,23-24H,4-10H2,1-3H3/t14-,15+,16-,17-,18+,19-,20-,21+/m0/s1	UEWNVBNIVGLQPG-XXHSLLPRSA-N	9967418	1-[(3S,7S,8S,9S,10R,13S,14S,17S)-3,7-dihydroxy-10,13-dimethyl-2,3,4,7,8,9,11,12,14,15,16,17-dodecahydro-1H-cyclopenta[a]phenanthren-17-yl]ethanone
7α-hydroxytestosterone	C19H28O3	62-83-9	CHEBI_2295	C[C@]12CC[C@H]3[C@H]([C@@H]1CC[C@@H]2O)[C@@H](CC4=CC(=O)CC[C@]34C)O	InChI=1S/C19H28O3/c1-18-7-5-12(20)9-11(18)10-15(21)17-13-3-4-16(22)19(13,2)8-6-14(17)18/h9,13-17,21-22H,3-8,10H2,1-2H3/t13-,14-,15+,16-,17-,18-,19-/m0/s1	RNCGWYKXAJCOLD-JUKXBMAYSA-N	65541	(7R,8R,9S,10R,13S,14S,17S)-7,17-dihydroxy-10,13-dimethyl-1,2,6,7,8,9,11,12,14,15,16,17-dodecahydrocyclopenta[a]phenanthren-3-one
7β-hydroxycholesterol	C27H46O2	566-27-8	CHEBI_42989	C[C@H](CCCC(C)C)[C@H]1CC[C@@H]2[C@@]1(CC[C@H]3[C@H]2[C@H](C=C4[C@@]3(CC[C@@H](C4)O)C)O)C	InChI=1S/C27H46O2/c1-17(2)7-6-8-18(3)21-9-10-22-25-23(12-14-27(21,22)5)26(4)13-11-20(28)15-19(26)16-24(25)29/h16-18,20-25,28-29H,6-15H2,1-5H3/t18-,20+,21-,22+,23+,24+,25+,26+,27-/m1/s1	OYXZMSRRJOYLLO-KGZHIOMZSA-N	473141	(3S,7R,8S,9S,10R,13R,14S,17R)-10,13-dimethyl-17-[(2R)-6-methylheptan-2-yl]-2,3,4,7,8,9,11,12,14,15,16,17-dodecahydro-1H-cyclopenta[a]phenanthrene-3,7-diol
7β-hydroxy-DHEA	C19H28O3	2487-48-1	CHEBI_183368	C[C@]12CC[C@H]3[C@H]([C@@H]1CCC2=O)[C@H](C=C4[C@@]3(CC[C@@H](C4)O)C)O	InChI=1S/C19H28O3/c1-18-7-5-12(20)9-11(18)10-15(21)17-13-3-4-16(22)19(13,2)8-6-14(17)18/h10,12-15,17,20-21H,3-9H2,1-2H3/t12-,13-,14-,15-,17-,18-,19-/m0/s1	OLPSAOWBSPXZEA-GCNMQWDSSA-N	9817954	(3S,7R,8R,9S,10R,13S,14S)-3,7-dihydroxy-10,13-dimethyl-1,2,3,4,7,8,9,11,12,14,15,16-dodecahydrocyclopenta[a]phenanthren-17-one
7-ketocholesterol	C27H44O2	566-28-9	CHEBI_64294	C[C@H](CCCC(C)C)[C@H]1CC[C@@H]2[C@@]1(CC[C@H]3[C@H]2C(=O)C=C4[C@@]3(CC[C@@H](C4)O)C)C	InChI=1S/C27H44O2/c1-17(2)7-6-8-18(3)21-9-10-22-25-23(12-14-27(21,22)5)26(4)13-11-20(28)15-19(26)16-24(25)29/h16-18,20-23,25,28H,6-15H2,1-5H3/t18-,20+,21-,22+,23+,25+,26+,27-/m1/s1	YIKKMWSQVKJCOP-ABXCMAEBSA-N	91474	(3S,8S,9S,10R,13R,14S,17R)-3-hydroxy-10,13-dimethyl-17-[(2R)-6-methylheptan-2-yl]-1,2,3,4,8,9,11,12,14,15,16,17-dodecahydrocyclopenta[a]phenanthren-7-one
Aldosterone	C21H28O5	52-39-1	CHEBI_27584	C[C@]12CCC(=O)C=C1CC[C@@H]3[C@@H]2[C@H](C[C@]4([C@H]3CC[C@@H]4C(=O)CO)C=O)O	InChI=1S/C21H28O5/c1-20-7-6-13(24)8-12(20)2-3-14-15-4-5-16(18(26)10-22)21(15,11-23)9-17(25)19(14)20/h8,11,14-17,19,22,25H,2-7,9-10H2,1H3/t14-,15-,16+,17-,19+,20-,21+/m0/s1	PQSUYGKTWSAVDQ-ZVIOFETBSA-N	5839	(8S,9S,10R,11S,13R,14S,17S)-11-hydroxy-17-(2-hydroxyacetyl)-10-methyl-3-oxo-1,2,6,7,8,9,11,12,14,15,16,17-dodecahydrocyclopenta[a]phenanthrene-13-carbaldehyde
Allopregnanolone	C21H34O2	516-54-1	CHEBI_50169	CC(=O)[C@H]1CC[C@@H]2[C@@]1(CC[C@H]3[C@H]2CC[C@@H]4[C@@]3(CC[C@H](C4)O)C)C	InChI=1S/C21H34O2/c1-13(22)17-6-7-18-16-5-4-14-12-15(23)8-10-20(14,2)19(16)9-11-21(17,18)3/h14-19,23H,4-12H2,1-3H3/t14-,15+,16-,17+,18-,19-,20-,21+/m0/s1	AURFZBICLPNKBZ-SYBPFIFISA-N	92786	1-[(3R,5S,8R,9S,10S,13S,14S,17S)-3-hydroxy-10,13-dimethyl-2,3,4,5,6,7,8,9,11,12,14,15,16,17-tetradecahydro-1H-cyclopenta[a]phenanthren-17-yl]ethanone
Allopregnenolone	C21H32O2	566-61-0	CHEBI_746895	CC(=O)C1=CC[C@@H]2[C@@]1(CC[C@H]3[C@H]2CC[C@@H]4[C@@]3(CC[C@@H](C4)O)C)C	InChI=1S/C21H32O2/c1-13(22)17-6-7-18-16-5-4-14-12-15(23)8-10-20(14,2)19(16)9-11-21(17,18)3/h6,14-16,18-19,23H,4-5,7-12H2,1-3H3/t14-,15-,16-,18-,19-,20-,21+/m0/s1	SFXPZLCQRZASKK-CKBUFISISA-N	1775252	1-[(3S,5S,8R,9S,10S,13S,14S)-3-hydroxy-10,13-dimethyl-2,3,4,5,6,7,8,9,11,12,14,15-dodecahydro-1H-cyclopenta[a]phenanthren-17-yl]ethanone
Allotetrahydro-11-dehydrocorticosterone	C21H32O4	14107-37-0	CHEBI_746896	C[C@]12CC[C@H](C[C@@H]1CC[C@@H]3[C@@H]2C(=O)C[C@]4([C@H]3CC[C@@H]4C(=O)CO)C)O	InChI=1S/C21H32O4/c1-20-8-7-13(23)9-12(20)3-4-14-15-5-6-16(18(25)11-22)21(15,2)10-17(24)19(14)20/h12-16,19,22-23H,3-11H2,1-2H3/t12-,13+,14-,15-,16+,19+,20-,21-/m0/s1	XWYBFXIUISNTQG-VKMGZQQJSA-N	9798416	(3R,5S,8S,9S,10S,13S,14S,17S)-3-hydroxy-17-(2-hydroxyacetyl)-10,13-dimethyl-1,2,3,4,5,6,7,8,9,12,14,15,16,17-tetradecahydrocyclopenta[a]phenanthren-11-one
Androstanetriol	C19H32O3	4725-51-3	CHEBI_746897	C[C@@]12CCC[C@H]1[C@@H]3C[C@H]([C@]4(C[C@H](CC[C@@]4([C@H]3CC2)C)O)O)O	InChI=1S/C19H32O3/c1-17-7-3-4-14(17)13-10-16(21)19(22)11-12(20)5-9-18(19,2)15(13)6-8-17/h12-16,20-22H,3-11H2,1-2H3/t12-,13-,14-,15-,16+,17-,18+,19-/m0/s1	IFRIPYPBJCUNAG-OTMXHXQLSA-N	53232379	(3S,5R,6R,8S,9S,10R,13S,14S)-10,13-dimethyl-1,2,3,4,6,7,8,9,11,12,14,15,16,17-tetradecahydrocyclopenta[a]phenanthrene-3,5,6-triol
Androstenediol	C19H30O2	521-17-5	CHEBI_2710	C[C@]12CC[C@H]3[C@H]([C@@H]1CC[C@@H]2O)CC=C4[C@@]3(CC[C@@H](C4)O)C	InChI=1S/C19H30O2/c1-18-9-7-13(20)11-12(18)3-4-14-15-5-6-17(21)19(15,2)10-8-16(14)18/h3,13-17,20-21H,4-11H2,1-2H3/t13-,14-,15-,16-,17-,18-,19-/m0/s1	QADHLRWLCPCEKT-LOVVWNRFSA-N	10634	(3S,8R,9S,10R,13S,14S,17S)-10,13-dimethyl-2,3,4,7,8,9,11,12,14,15,16,17-dodecahydro-1H-cyclopenta[a]phenanthrene-3,17-diol
Androstenedione	C19H26O2	63-05-8	CHEBI_16422	C[C@]12CCC(=O)C=C1CC[C@@H]3[C@@H]2CC[C@]4([C@H]3CCC4=O)C	InChI=1S/C19H26O2/c1-18-9-7-13(20)11-12(18)3-4-14-15-5-6-17(21)19(15,2)10-8-16(14)18/h11,14-16H,3-10H2,1-2H3/t14-,15-,16-,18-,19-/m0/s1	AEMFNILZOJDQLW-QAGGRKNESA-N	6128	(8R,9S,10R,13S,14S)-10,13-dimethyl-2,6,7,8,9,11,12,14,15,16-decahydro-1H-cyclopenta[a]phenanthrene-3,17-dione
Androstenedione 13C3	C19H26O2	327048-86-2		C[C@]12CC[C@H]3[C@H]([C@@H]1CCC2=O)CCC4=[13CH][13C](=O)[13CH2]C[C@]34C	InChI=1S/C19H26O2/c1-18-9-7-13(20)11-12(18)3-4-14-15-5-6-17(21)19(15,2)10-8-16(14)18/h11,14-16H,3-10H2,1-2H3/t14-,15-,16-,18-,19-/m0/s1/i7+1,11+1,13+1	AEMFNILZOJDQLW-FZIFMXJCSA-N	12502770	(8R,9S,10R,13S,14S)-10,13-dimethyl-2,6,7,8,9,11,12,14,15,16-decahydro-1H-cyclopenta[a]phenanthrene-3,17-dione
Androstene-3β,16α,17α-triol	C19H30O3	23409-40-7	CHEBI_173051	C[C@]12CC[C@@H](CC1=CC[C@@H]3[C@@H]2CC[C@]4([C@H]3C[C@H]([C@H]4O)O)C)O	InChI=1S/C19H30O3/c1-18-7-5-12(20)9-11(18)3-4-13-14(18)6-8-19(2)15(13)10-16(21)17(19)22/h3,12-17,20-22H,4-10H2,1-2H3/t12-,13+,14-,15-,16+,17+,18-,19-/m0/s1	GUGSXATYPSGVAY-LFJLJVMTSA-N	21252252	(3S,8R,9S,10R,13S,14S,16R,17S)-10,13-dimethyl-2,3,4,7,8,9,11,12,14,15,16,17-dodecahydro-1H-cyclopenta[a]phenanthrene-3,16,17-triol
Androstene-3β,16α,17β-triol	C19H30O3	4150-30-5	CHEBI_89531	C[C@]12CC[C@@H](CC1=CC[C@@H]3[C@@H]2CC[C@]4([C@H]3C[C@H]([C@@H]4O)O)C)O	InChI=1S/C19H30O3/c1-18-7-5-12(20)9-11(18)3-4-13-14(18)6-8-19(2)15(13)10-16(21)17(19)22/h3,12-17,20-22H,4-10H2,1-2H3/t12-,13+,14-,15-,16+,17-,18-,19-/m0/s1	GUGSXATYPSGVAY-DHKQUUGRSA-N	9818021	(3S,8R,9S,10R,13S,14S,16R,17R)-10,13-dimethyl-2,3,4,7,8,9,11,12,14,15,16,17-dodecahydro-1H-cyclopenta[a]phenanthrene-3,16,17-triol
Androstene-3β,16β,17α-triol	C19H30O3	25126-70-9	CHEBI_166769	C[C@]12CC[C@@H](CC1=CC[C@@H]3[C@@H]2CC[C@]4([C@H]3C[C@@H]([C@H]4O)O)C)O	InChI=1S/C19H30O3/c1-18-7-5-12(20)9-11(18)3-4-13-14(18)6-8-19(2)15(13)10-16(21)17(19)22/h3,12-17,20-22H,4-10H2,1-2H3/t12-,13+,14-,15-,16-,17+,18-,19-/m0/s1	GUGSXATYPSGVAY-CUZKMJQKSA-N	21252251	(3S,8R,9S,10R,13S,14S,16S,17S)-10,13-dimethyl-2,3,4,7,8,9,11,12,14,15,16,17-dodecahydro-1H-cyclopenta[a]phenanthrene-3,16,17-triol
Androsterone	C19H30O2	53-41-8	CHEBI_16032	C[C@]12CC[C@H](C[C@@H]1CC[C@@H]3[C@@H]2CC[C@]4([C@H]3CCC4=O)C)O	InChI=1S/C19H30O2/c1-18-9-7-13(20)11-12(18)3-4-14-15-5-6-17(21)19(15,2)10-8-16(14)18/h12-16,20H,3-11H2,1-2H3/t12-,13+,14-,15-,16-,18-,19-/m0/s1	QGXBDMJGAMFCBF-HLUDHZFRSA-N	5879	(3R,5S,8R,9S,10S,13S,14S)-3-hydroxy-10,13-dimethyl-1,2,3,4,5,6,7,8,9,11,12,14,15,16-tetradecahydrocyclopenta[a]phenanthren-17-one
Androsterone 3α-Glucuronide	C25H38O8	1852-43-3	CHEBI_28832	C[C@]12CC[C@H](C[C@@H]1CC[C@@H]3[C@@H]2CC[C@]4([C@H]3CCC4=O)C)O[C@H]5[C@@H]([C@H]([C@@H]([C@H](O5)C(=O)O)O)O)O	InChI=1S/C25H38O8/c1-24-9-7-13(32-23-20(29)18(27)19(28)21(33-23)22(30)31)11-12(24)3-4-14-15-5-6-17(26)25(15,2)10-8-16(14)24/h12-16,18-21,23,27-29H,3-11H2,1-2H3,(H,30,31)/t12-,13+,14-,15-,16-,18-,19-,20+,21-,23+,24-,25-/m0/s1	VFUIRAVTUVCQTF-BSOWLZGZSA-N	114833	(2S,3S,4S,5R,6R)-6-[[(3R,5S,8R,9S,10S,13S,14S)-10,13-dimethyl-17-oxo-1,2,3,4,5,6,7,8,9,11,12,14,15,16-tetradecahydrocyclopenta[a]phenanthren-3-yl]oxy]-3,4,5-trihydroxyoxane-2-carboxylic acid
Androsterone Sulfate	C19H30O5S	2479-86-9	CHEBI_83037	C[C@]12CC[C@H](C[C@@H]1CC[C@@H]3[C@@H]2CC[C@]4([C@H]3CCC4=O)C)OS(=O)(=O)O	InChI=1S/C19H30O5S/c1-18-9-7-13(24-25(21,22)23)11-12(18)3-4-14-15-5-6-17(20)19(15,2)10-8-16(14)18/h12-16H,3-11H2,1-2H3,(H,21,22,23)/t12-,13+,14-,15-,16-,18-,19-/m0/s1	ZMITXKRGXGRMKS-HLUDHZFRSA-N	159663	[(3R,5S,8R,9S,10S,13S,14S)-10,13-dimethyl-17-oxo-1,2,3,4,5,6,7,8,9,11,12,14,15,16-tetradecahydrocyclopenta[a]phenanthren-3-yl] hydrogen sulfate
Chenodeoxycholic acid	C24H40O4	474-25-9	CHEBI_16755	C[C@H](CCC(=O)O)[C@H]1CC[C@@H]2[C@@]1(CC[C@H]3[C@H]2[C@@H](C[C@H]4[C@@]3(CC[C@H](C4)O)C)O)C	InChI=1S/C24H40O4/c1-14(4-7-21(27)28)17-5-6-18-22-19(9-11-24(17,18)3)23(2)10-8-16(25)12-15(23)13-20(22)26/h14-20,22,25-26H,4-13H2,1-3H3,(H,27,28)/t14-,15+,16-,17-,18+,19+,20-,22+,23+,24-/m1/s1	RUDATBOHQWOJDD-BSWAIDMHSA-N	10133	(4R)-4-[(3R,5S,7R,8R,9S,10S,13R,14S,17R)-3,7-dihydroxy-10,13-dimethyl-2,3,4,5,6,7,8,9,11,12,14,15,16,17-tetradecahydro-1H-cyclopenta[a]phenanthren-17-yl]pentanoic acid
Cholesterol	C27H46O	57-88-5	CHEBI_16113	C[C@H](CCCC(C)C)[C@H]1CC[C@@H]2[C@@]1(CC[C@H]3[C@H]2CC=C4[C@@]3(CC[C@@H](C4)O)C)C	InChI=1S/C27H46O/c1-18(2)7-6-8-19(3)23-11-12-24-22-10-9-20-17-21(28)13-15-26(20,4)25(22)14-16-27(23,24)5/h9,18-19,21-25,28H,6-8,10-17H2,1-5H3/t19-,21+,22+,23-,24+,25+,26+,27-/m1/s1	HVYWMOMLDIMFJA-DPAQBDIFSA-N	5997	(3S,8S,9S,10R,13R,14S,17R)-10,13-dimethyl-17-[(2R)-6-methylheptan-2-yl]-2,3,4,7,8,9,11,12,14,15,16,17-dodecahydro-1H-cyclopenta[a]phenanthren-3-ol
Cholesteryl butyrate	C31H52O2	521-13-1	CHEBI_746898	C[C@@]12[C@@]3([C@]([C@]4([C@](C)(CC3)[C@@]([C@@H](CCCC(C)C)C)(CC4)[H])[H])(CC=C1C[C@@H](OC(CCC)=O)CC2)[H])[H]	InChI=1S/C31H52O2/c1-7-9-29(32)33-24-16-18-30(5)23(20-24)12-13-25-27-15-14-26(22(4)11-8-10-21(2)3)31(27,6)19-17-28(25)30/h12,21-22,24-28H,7-11,13-20H2,1-6H3/t22-,24+,25+,26-,27+,28+,30+,31-/m1/s1	CKDZWMVGDHGMFR-GTPODGLVSA-N	101741	[(3S,8S,9S,10R,13R,14S,17R)-10,13-dimethyl-17-[(2R)-6-methylheptan-2-yl]-2,3,4,7,8,9,11,12,14,15,16,17-dodecahydro-1H-cyclopenta[a]phenanthren-3-yl] butanoate
Cholic acid	C24H40O5	81-25-4	CHEBI_16359	C[C@H](CCC(=O)O)[C@H]1CC[C@@H]2[C@@]1([C@H](C[C@H]3[C@H]2[C@@H](C[C@H]4[C@@]3(CC[C@H](C4)O)C)O)O)C	InChI=1S/C24H40O5/c1-13(4-7-21(28)29)16-5-6-17-22-18(12-20(27)24(16,17)3)23(2)9-8-15(25)10-14(23)11-19(22)26/h13-20,22,25-27H,4-12H2,1-3H3,(H,28,29)/t13-,14+,15-,16-,17+,18+,19-,20+,22+,23+,24-/m1/s1	BHQCQFFYRZLCQQ-OELDTZBJSA-N	221493	(4R)-4-[(3R,5S,7R,8R,9S,10S,12S,13R,14S,17R)-3,7,12-trihydroxy-10,13-dimethyl-2,3,4,5,6,7,8,9,11,12,14,15,16,17-tetradecahydro-1H-cyclopenta[a]phenanthren-17-yl]pentanoic acid
Corticosterone	C21H30O4	50-22-6	CHEBI_16827	C[C@]12CCC(=O)C=C1CC[C@@H]3[C@@H]2[C@H](C[C@]4([C@H]3CC[C@@H]4C(=O)CO)C)O	InChI=1S/C21H30O4/c1-20-8-7-13(23)9-12(20)3-4-14-15-5-6-16(18(25)11-22)21(15,2)10-17(24)19(14)20/h9,14-17,19,22,24H,3-8,10-11H2,1-2H3/t14-,15-,16+,17-,19+,20-,21-/m0/s1	OMFXVFTZEKFJBZ-HJTSIMOOSA-N	5753	(8S,9S,10R,11S,13S,14S,17S)-11-hydroxy-17-(2-hydroxyacetyl)-10,13-dimethyl-1,2,6,7,8,9,11,12,14,15,16,17-dodecahydrocyclopenta[a]phenanthren-3-one
Cortisol	C21H30O5	50-23-7	CHEBI_17650	C[C@]12CCC(=O)C=C1CC[C@@H]3[C@@H]2[C@H](C[C@]4([C@H]3CC[C@@]4(C(=O)CO)O)C)O	InChI=1S/C21H30O5/c1-19-7-5-13(23)9-12(19)3-4-14-15-6-8-21(26,17(25)11-22)20(15,2)10-16(24)18(14)19/h9,14-16,18,22,24,26H,3-8,10-11H2,1-2H3/t14-,15-,16-,18+,19-,20-,21-/m0/s1	JYGXADMDTFJGBT-VWUMJDOOSA-N	5754	(8S,9S,10R,11S,13S,14S,17R)-11,17-dihydroxy-17-(2-hydroxyacetyl)-10,13-dimethyl-2,6,7,8,9,11,12,14,15,16-decahydro-1H-cyclopenta[a]phenanthren-3-one
Cortisol 13C3	C21H30O5	1996649-39-8		C[C@]12C[13CH2][13C](=O)[13CH]=C1CCC3C2[C@H](C[C@]4(C3CC[C@@]4(C(=O)CO)O)C)O	InChI=1S/C21H30O5/c1-19-7-5-13(23)9-12(19)3-4-14-15-6-8-21(26,17(25)11-22)20(15,2)10-16(24)18(14)19/h9,14-16,18,22,24,26H,3-8,10-11H2,1-2H3/t14?,15?,16-,18?,19-,20-,21-/m0/s1/i5+1,9+1,13+1	JYGXADMDTFJGBT-KKPOWBTRSA-N	124202967	(10R,11S,13S,17R)-11,17-dihydroxy-17-(2-hydroxyacetyl)-10,13-dimethyl-2,6,7,8,9,11,12,14,15,16-decahydro-1H-cyclopenta[a]phenanthren-3-one
Cortisone	C21H28O5	53-06-5	CHEBI_16962	C[C@]12CCC(=O)C=C1CC[C@@H]3[C@@H]2C(=O)C[C@]4([C@H]3CC[C@@]4(C(=O)CO)O)C	InChI=1S/C21H28O5/c1-19-7-5-13(23)9-12(19)3-4-14-15-6-8-21(26,17(25)11-22)20(15,2)10-16(24)18(14)19/h9,14-15,18,22,26H,3-8,10-11H2,1-2H3/t14-,15-,18+,19-,20-,21-/m0/s1	MFYSYFVPBJMHGN-ZPOLXVRWSA-N	222786	(8S,9S,10R,13S,14S,17R)-17-hydroxy-17-(2-hydroxyacetyl)-10,13-dimethyl-1,2,6,7,8,9,12,14,15,16-decahydrocyclopenta[a]phenanthrene-3,11-dione
Cortisone 13C3	C21H28O5			C[C@]12C[13CH2][13C](=O)[13CH]=C1CCC3C2C(=O)C[C@]4(C3CC[C@@]4(C(=O)CO)O)C	InChI=1S/C21H28O5/c1-19-7-5-13(23)9-12(19)3-4-14-15-6-8-21(26,17(25)11-22)20(15,2)10-16(24)18(14)19/h9,14-15,18,22,26H,3-8,10-11H2,1-2H3/t14?,15?,18?,19-,20-,21-/m0/s1/i5+1,9+1,13+1	MFYSYFVPBJMHGN-FTFXCUAESA-N	124202968	(10R,13S,17R)-17-hydroxy-17-(2-hydroxyacetyl)-10,13-dimethyl-1,2,6,7,8,9,12,14,15,16-decahydrocyclopenta[a]phenanthrene-3,11-dione
DHA (Dehydroandrosterone)	C19H28O2	2283-82-1	CHEBI_746899	C[C@]12CC[C@H]3[C@H]([C@@H]1CCC2=O)CC=C4[C@@]3(CC[C@H](C4)O)C	InChI=1S/C19H28O2/c1-18-9-7-13(20)11-12(18)3-4-14-15-5-6-17(21)19(15,2)10-8-16(14)18/h3,13-16,20H,4-11H2,1-2H3/t13-,14+,15+,16+,18+,19+/m1/s1	FMGSKLZLMKYGDP-HKQXQEGQSA-N	134506	(3R,8R,9S,10R,13S,14S)-3-hydroxy-10,13-dimethyl-1,2,3,4,7,8,9,11,12,14,15,16-dodecahydrocyclopenta[a]phenanthren-17-one
DHEA (Dehydroepiandrosterone)	C19H28O2	53-43-0	CHEBI_28689	C[C@]12CC[C@H]3[C@H]([C@@H]1CCC2=O)CC=C4[C@@]3(CC[C@@H](C4)O)C	InChI=1S/C19H28O2/c1-18-9-7-13(20)11-12(18)3-4-14-15-5-6-17(21)19(15,2)10-8-16(14)18/h3,13-16,20H,4-11H2,1-2H3/t13-,14-,15-,16-,18-,19-/m0/s1	FMGSKLZLMKYGDP-USOAJAOKSA-N	5881	(3S,8R,9S,10R,13S,14S)-3-hydroxy-10,13-dimethyl-1,2,3,4,7,8,9,11,12,14,15,16-dodecahydrocyclopenta[a]phenanthren-17-one
DHEA Glucuronide	C25H36O8	3331-64-4	CHEBI_68834	C[C@]12CC[C@H]3[C@H]([C@@H]1CCC2=O)CC=C4[C@@]3(CC[C@@H](C4)O[C@H]5[C@@H]([C@H]([C@@H]([C@H](O5)C(=O)O)O)O)O)C	InChI=1S/C25H36O8/c1-24-9-7-13(32-23-20(29)18(27)19(28)21(33-23)22(30)31)11-12(24)3-4-14-15-5-6-17(26)25(15,2)10-8-16(14)24/h3,13-16,18-21,23,27-29H,4-11H2,1-2H3,(H,30,31)/t13-,14-,15-,16-,18-,19-,20+,21-,23+,24-,25-/m0/s1	GLONBVCUAVPJFV-PCDHEYSGSA-N	470824	(2S,3S,4S,5R,6R)-6-[[(3S,8R,9S,10R,13S,14S)-10,13-dimethyl-17-oxo-1,2,3,4,7,8,9,11,12,14,15,16-dodecahydrocyclopenta[a]phenanthren-3-yl]oxy]-3,4,5-trihydroxyoxane-2-carboxylic acid
DHEA Sulfate	C19H28O5S	651-48-9	CHEBI_16814	C[C@]12CC[C@H]3[C@H]([C@@H]1CCC2=O)CC=C4[C@@]3(CC[C@@H](C4)OS(=O)(=O)O)C	InChI=1S/C19H28O5S/c1-18-9-7-13(24-25(21,22)23)11-12(18)3-4-14-15-5-6-17(20)19(15,2)10-8-16(14)18/h3,13-16H,4-11H2,1-2H3,(H,21,22,23)/t13-,14-,15-,16-,18-,19-/m0/s1	CZWCKYRVOZZJNM-USOAJAOKSA-N	12594	[(3S,8R,9S,10R,13S,14S)-10,13-dimethyl-17-oxo-1,2,3,4,7,8,9,11,12,14,15,16-dodecahydrocyclopenta[a]phenanthren-3-yl] hydrogen sulfate
Epiandrosterone	C19H30O2	481-29-8	CHEBI_541975	C[C@]12CC[C@@H](C[C@@H]1CC[C@@H]3[C@@H]2CC[C@]4([C@H]3CCC4=O)C)O	InChI=1S/C19H30O2/c1-18-9-7-13(20)11-12(18)3-4-14-15-5-6-17(21)19(15,2)10-8-16(14)18/h12-16,20H,3-11H2,1-2H3/t12-,13-,14-,15-,16-,18-,19-/m0/s1	QGXBDMJGAMFCBF-LUJOEAJASA-N	441302	(3S,5S,8R,9S,10S,13S,14S)-3-hydroxy-10,13-dimethyl-1,2,3,4,5,6,7,8,9,11,12,14,15,16-tetradecahydrocyclopenta[a]phenanthren-17-one
Epietiocholanolone	C19H30O2	571-31-3	CHEBI_89524	C[C@]12CC[C@@H](C[C@H]1CC[C@@H]3[C@@H]2CC[C@]4([C@H]3CCC4=O)C)O	InChI=1S/C19H30O2/c1-18-9-7-13(20)11-12(18)3-4-14-15-5-6-17(21)19(15,2)10-8-16(14)18/h12-16,20H,3-11H2,1-2H3/t12-,13+,14+,15+,16+,18+,19+/m1/s1	QGXBDMJGAMFCBF-XRJZGPCZSA-N	247732	(3S,5R,8R,9S,10S,13S,14S)-3-hydroxy-10,13-dimethyl-1,2,3,4,5,6,7,8,9,11,12,14,15,16-tetradecahydrocyclopenta[a]phenanthren-17-one
Epitestosterone	C19H28O2	481-30-1	CHEBI_42534	C[C@]12CC[C@H]3[C@H]([C@@H]1CC[C@H]2O)CCC4=CC(=O)CC[C@]34C	InChI=1S/C19H28O2/c1-18-9-7-13(20)11-12(18)3-4-14-15-5-6-17(21)19(15,2)10-8-16(14)18/h11,14-17,21H,3-10H2,1-2H3/t14-,15-,16-,17+,18-,19-/m0/s1	MUMGGOZAMZWBJJ-KZYORJDKSA-N	10204	(8R,9S,10R,13S,14S,17R)-17-hydroxy-10,13-dimethyl-1,2,6,7,8,9,11,12,14,15,16,17-dodecahydrocyclopenta[a]phenanthren-3-one
Epitestosterone 17α-Glucuronide	C25H36O8	16996-33-1	CHEBI_136673	C[C@]12CC[C@H]3[C@H]([C@@H]1CC[C@H]2O[C@H]4[C@@H]([C@H]([C@@H]([C@H](O4)C(=O)O)O)O)O)CCC5=CC(=O)CC[C@]35C	InChI=1S/C25H36O8/c1-24-9-7-13(26)11-12(24)3-4-14-15-5-6-17(25(15,2)10-8-16(14)24)32-23-20(29)18(27)19(28)21(33-23)22(30)31/h11,14-21,23,27-29H,3-10H2,1-2H3,(H,30,31)/t14-,15-,16-,17+,18-,19-,20+,21-,23+,24-,25-/m0/s1	NIKZPECGCSUSBV-RWUBDERLSA-N	99564860	(2S,3S,4S,5R,6R)-6-[[(8R,9S,10R,13S,14S,17R)-10,13-dimethyl-3-oxo-1,2,6,7,8,9,11,12,14,15,16,17-dodecahydrocyclopenta[a]phenanthren-17-yl]oxy]-3,4,5-trihydroxyoxane-2-carboxylic acid
Epitestosterone 17α-Sulfate	C19H28O5S	4579-56-0	CHEBI_174904	C1(=O)CC[C@]2(C(=C1)CC[C@H]1[C@@H]3CC[C@H]([C@@]3(C)CC[C@H]21)OS(=O)(=O)O)C	InChI=1S/C19H28O5S/c1-18-9-7-13(20)11-12(18)3-4-14-15-5-6-17(24-25(21,22)23)19(15,2)10-8-16(14)18/h11,14-17H,3-10H2,1-2H3,(H,21,22,23)/t14-,15-,16-,17+,18-,19-/m0/s1	WAQBISPOEAOCOG-KZYORJDKSA-N	12133250	[(8R,9S,10R,13S,14S,17R)-10,13-dimethyl-3-oxo-1,2,6,7,8,9,11,12,14,15,16,17-dodecahydrocyclopenta[a]phenanthren-17-yl] hydrogen sulfate
Estrone (E1)	C18H22O2	53-16-7	CHEBI_17263	C[C@]12CC[C@H]3[C@H]([C@@H]1CCC2=O)CCC4=C3C=CC(=C4)O	InChI=1S/C18H22O2/c1-18-9-8-14-13-5-3-12(19)10-11(13)2-4-15(14)16(18)6-7-17(18)20/h3,5,10,14-16,19H,2,4,6-9H2,1H3/t14-,15-,16+,18+/m1/s1	DNXHEGUUPJUMQT-CBZIJGRNSA-N	5870	(8R,9S,13S,14S)-3-hydroxy-13-methyl-7,8,9,11,12,14,15,16-octahydro-6H-cyclopenta[a]phenanthren-17-one
Estrone 13C3	C18H22O2	1241684-29-6		C[C@]12CC[C@H]3[C@H]([C@@H]1CCC2=O)CCC4=C3C=[13CH][13C](=[13CH]4)O	InChI=1S/C18H22O2/c1-18-9-8-14-13-5-3-12(19)10-11(13)2-4-15(14)16(18)6-7-17(18)20/h3,5,10,14-16,19H,2,4,6-9H2,1H3/t14-,15-,16+,18+/m1/s1/i3+1,10+1,12+1	DNXHEGUUPJUMQT-JTCDCFKFSA-N	66995388	(8R,9S,13S,14S)-3-hydroxy-13-methyl-7,8,9,11,12,14,15,16-octahydro-6H-cyclopenta[a]phenanthren-17-one
Estrone 3-Glucuronide	C24H30O8	2479-90-5	CHEBI_28919	C[C@]12CC[C@H]3[C@H]([C@@H]1CCC2=O)CCC4=C3C=CC(=C4)O[C@H]5[C@@H]([C@H]([C@@H]([C@H](O5)C(=O)O)O)O)O	InChI=1S/C24H30O8/c1-24-9-8-14-13-5-3-12(10-11(13)2-4-15(14)16(24)6-7-17(24)25)31-23-20(28)18(26)19(27)21(32-23)22(29)30/h3,5,10,14-16,18-21,23,26-28H,2,4,6-9H2,1H3,(H,29,30)/t14-,15-,16+,18+,19+,20-,21+,23-,24+/m1/s1	FJAZVHYPASAQKM-JBAURARKSA-N	115255	(2S,3S,4S,5R,6S)-3,4,5-trihydroxy-6-[[(8R,9S,13S,14S)-13-methyl-17-oxo-7,8,9,11,12,14,15,16-octahydro-6H-cyclopenta[a]phenanthren-3-yl]oxy]oxane-2-carboxylic acid
Estrone Sulfate	C18H22O5S	481-97-0	CHEBI_17474	C[C@]12CC[C@H]3[C@H]([C@@H]1CCC2=O)CCC4=C3C=CC(=C4)OS(=O)(=O)O	InChI=1S/C18H22O5S/c1-18-9-8-14-13-5-3-12(23-24(20,21)22)10-11(13)2-4-15(14)16(18)6-7-17(18)19/h3,5,10,14-16H,2,4,6-9H2,1H3,(H,20,21,22)/t14-,15-,16+,18+/m1/s1	JKKFKPJIXZFSSB-CBZIJGRNSA-N	3001028	[(8R,9S,13S,14S)-13-methyl-17-oxo-7,8,9,11,12,14,15,16-octahydro-6H-cyclopenta[a]phenanthren-3-yl] hydrogen sulfate
Etiocholane-3α,17α-diol	C19H32O2	5856-10-0	CHEBI_229004	C[C@]12CC[C@H](C[C@H]1CC[C@@H]3[C@@H]2CC[C@]4([C@H]3CC[C@H]4O)C)O	InChI=1S/C19H32O2/c1-18-9-7-13(20)11-12(18)3-4-14-15-5-6-17(21)19(15,2)10-8-16(14)18/h12-17,20-21H,3-11H2,1-2H3/t12-,13-,14+,15+,16+,17-,18+,19+/m1/s1	CBMYJHIOYJEBSB-ULTMTAQRSA-N	9965876	(3R,5R,8R,9S,10S,13S,14S,17R)-10,13-dimethyl-2,3,4,5,6,7,8,9,11,12,14,15,16,17-tetradecahydro-1H-cyclopenta[a]phenanthrene-3,17-diol
Etiocholane-3α,17β-diol	C19H32O2	1851-23-6	CHEBI_36714	C[C@]12CC[C@H](C[C@H]1CC[C@@H]3[C@@H]2CC[C@]4([C@H]3CC[C@@H]4O)C)O	InChI=1S/C19H32O2/c1-18-9-7-13(20)11-12(18)3-4-14-15-5-6-17(21)19(15,2)10-8-16(14)18/h12-17,20-21H,3-11H2,1-2H3/t12-,13-,14+,15+,16+,17+,18+,19+/m1/s1	CBMYJHIOYJEBSB-GCXXXECGSA-N	134494	(3R,5R,8R,9S,10S,13S,14S,17S)-10,13-dimethyl-2,3,4,5,6,7,8,9,11,12,14,15,16,17-tetradecahydro-1H-cyclopenta[a]phenanthrene-3,17-diol
Etiocholanedione	C19H28O2	1229-12-5	CHEBI_16985	C[C@]12CCC(=O)C[C@H]1CC[C@@H]3[C@@H]2CC[C@]4([C@H]3CCC4=O)C	InChI=1S/C19H28O2/c1-18-9-7-13(20)11-12(18)3-4-14-15-5-6-17(21)19(15,2)10-8-16(14)18/h12,14-16H,3-11H2,1-2H3/t12-,14+,15+,16+,18+,19+/m1/s1	RAJWOBJTTGJROA-QJISAEMRSA-N	440114	(5R,8R,9S,10S,13S,14S)-10,13-dimethyl-2,4,5,6,7,8,9,11,12,14,15,16-dodecahydro-1H-cyclopenta[a]phenanthrene-3,17-dione
Etiocholanolone	C19H30O2	53-42-9	CHEBI_28195	C[C@]12CC[C@H](C[C@H]1CC[C@@H]3[C@@H]2CC[C@]4([C@H]3CCC4=O)C)O	InChI=1S/C19H30O2/c1-18-9-7-13(20)11-12(18)3-4-14-15-5-6-17(21)19(15,2)10-8-16(14)18/h12-16,20H,3-11H2,1-2H3/t12-,13-,14+,15+,16+,18+,19+/m1/s1	QGXBDMJGAMFCBF-BNSUEQOYSA-N	5880	(3R,5R,8R,9S,10S,13S,14S)-3-hydroxy-10,13-dimethyl-1,2,3,4,5,6,7,8,9,11,12,14,15,16-tetradecahydrocyclopenta[a]phenanthren-17-one
Etiocholanolone 3α-Glucuronide	C25H38O8	3602-09-3	CHEBI_37451	C[C@]12CC[C@H](C[C@H]1CC[C@@H]3[C@@H]2CC[C@]4([C@H]3CCC4=O)C)O[C@H]5[C@@H]([C@H]([C@@H]([C@H](O5)C(=O)O)O)O)O	InChI=1S/C25H38O8/c1-24-9-7-13(32-23-20(29)18(27)19(28)21(33-23)22(30)31)11-12(24)3-4-14-15-5-6-17(26)25(15,2)10-8-16(14)24/h12-16,18-21,23,27-29H,3-11H2,1-2H3,(H,30,31)/t12-,13-,14+,15+,16+,18+,19+,20-,21+,23-,24+,25+/m1/s1	VFUIRAVTUVCQTF-SDHZCXLISA-N	443078	(2S,3S,4S,5R,6R)-6-[[(3R,5R,8R,9S,10S,13S,14S)-10,13-dimethyl-17-oxo-1,2,3,4,5,6,7,8,9,11,12,14,15,16-tetradecahydrocyclopenta[a]phenanthren-3-yl]oxy]-3,4,5-trihydroxyoxane-2-carboxylic acid
Etiocholanolone Sulfate	C19H30O5S		CHEBI_175770	C[C@]12CC[C@H](C[C@H]1CCC3C2CC[C@]4(C3CCC4=O)C)OS(=O)(=O)O	InChI=1S/C19H30O5S/c1-18-9-7-13(24-25(21,22)23)11-12(18)3-4-14-15-5-6-17(20)19(15,2)10-8-16(14)18/h12-16H,3-11H2,1-2H3,(H,21,22,23)/t12-,13-,14?,15?,16?,18+,19+/m1/s1	ZMITXKRGXGRMKS-ZQSLQREJSA-N	53481659	[(3R,5R,10S,13S)-10,13-dimethyl-17-oxo-1,2,3,4,5,6,7,8,9,11,12,14,15,16-tetradecahydrocyclopenta[a]phenanthren-3-yl] hydrogen sulfate
Glycochenodeoxycholic Acid	C26H43NO5	640-79-9	CHEBI_36274	C[C@H](CCC(=O)NCC(=O)O)[C@H]1CC[C@@H]2[C@@]1(CC[C@H]3[C@H]2[C@@H](C[C@H]4[C@@]3(CC[C@H](C4)O)C)O)C	InChI=1S/C26H43NO5/c1-15(4-7-22(30)27-14-23(31)32)18-5-6-19-24-20(9-11-26(18,19)3)25(2)10-8-17(28)12-16(25)13-21(24)29/h15-21,24,28-29H,4-14H2,1-3H3,(H,27,30)(H,31,32)/t15-,16+,17-,18-,19+,20+,21-,24+,25+,26-/m1/s1	GHCZAUBVMUEKKP-GYPHWSFCSA-N	12544	2-[[(4R)-4-[(3R,5S,7R,8R,9S,10S,13R,14S,17R)-3,7-dihydroxy-10,13-dimethyl-2,3,4,5,6,7,8,9,11,12,14,15,16,17-tetradecahydro-1H-cyclopenta[a]phenanthren-17-yl]pentanoyl]amino]acetic acid
Glycocholic Acid	C26H43NO6	475-31-0	CHEBI_17687	C[C@H](CCC(=O)NCC(=O)O)[C@H]1CC[C@@H]2[C@@]1([C@H](C[C@H]3[C@H]2[C@@H](C[C@H]4[C@@]3(CC[C@H](C4)O)C)O)O)C	InChI=1S/C26H43NO6/c1-14(4-7-22(31)27-13-23(32)33)17-5-6-18-24-19(12-21(30)26(17,18)3)25(2)9-8-16(28)10-15(25)11-20(24)29/h14-21,24,28-30H,4-13H2,1-3H3,(H,27,31)(H,32,33)/t14-,15+,16-,17-,18+,19+,20-,21+,24+,25+,26-/m1/s1	RFDAIACWWDREDC-FRVQLJSFSA-N	10140	2-[[(4R)-4-[(3R,5S,7R,8R,9S,10S,12S,13R,14S,17R)-3,7,12-trihydroxy-10,13-dimethyl-2,3,4,5,6,7,8,9,11,12,14,15,16,17-tetradecahydro-1H-cyclopenta[a]phenanthren-17-yl]pentanoyl]amino]acetic acid
Glycoursodeoxycholic acid	C26H43NO5	64480-66-6	CHEBI_89929	C[C@H](CCC(=O)NCC(=O)O)[C@H]1CC[C@@H]2[C@@]1(CC[C@H]3[C@H]2[C@H](C[C@H]4[C@@]3(CC[C@H](C4)O)C)O)C	InChI=1S/C26H43NO5/c1-15(4-7-22(30)27-14-23(31)32)18-5-6-19-24-20(9-11-26(18,19)3)25(2)10-8-17(28)12-16(25)13-21(24)29/h15-21,24,28-29H,4-14H2,1-3H3,(H,27,30)(H,31,32)/t15-,16+,17-,18-,19+,20+,21+,24+,25+,26-/m1/s1	GHCZAUBVMUEKKP-XROMFQGDSA-N	12310288	2-[[(4R)-4-[(3R,5S,7S,8R,9S,10S,13R,14S,17R)-3,7-dihydroxy-10,13-dimethyl-2,3,4,5,6,7,8,9,11,12,14,15,16,17-tetradecahydro-1H-cyclopenta[a]phenanthren-17-yl]pentanoyl]amino]acetic acid
Pregnanediol	C21H36O2	80-92-2	CHEBI_8387	C[C@@H]([C@H]1CC[C@@H]2[C@@]1(CC[C@H]3[C@H]2CC[C@H]4[C@@]3(CC[C@H](C4)O)C)C)O	InChI=1S/C21H36O2/c1-13(22)17-6-7-18-16-5-4-14-12-15(23)8-10-20(14,2)19(16)9-11-21(17,18)3/h13-19,22-23H,4-12H2,1-3H3/t13-,14+,15+,16-,17+,18-,19-,20-,21+/m0/s1	YWYQTGBBEZQBGO-BERLURQNSA-N	219833	(3R,5R,8R,9S,10S,13S,14S,17S)-17-[(1S)-1-hydroxyethyl]-10,13-dimethyl-2,3,4,5,6,7,8,9,11,12,14,15,16,17-tetradecahydro-1H-cyclopenta[a]phenanthren-3-ol
Pregnanediol Glucuronide	C27H44O8	1852-49-9	CHEBI_88765	C[C@@H]([C@H]1CC[C@@H]2[C@@]1(CC[C@H]3[C@H]2CC[C@H]4[C@@]3(CC[C@H](C4)O[C@H]5[C@@H]([C@H]([C@@H]([C@H](O5)C(=O)O)O)O)O)C)C)O	InChI=1S/C27H44O8/c1-13(28)17-6-7-18-16-5-4-14-12-15(8-10-26(14,2)19(16)9-11-27(17,18)3)34-25-22(31)20(29)21(30)23(35-25)24(32)33/h13-23,25,28-31H,4-12H2,1-3H3,(H,32,33)/t13-,14+,15+,16-,17+,18-,19-,20-,21-,22+,23-,25+,26-,27+/m0/s1	ZFFFJLDTCLJDHL-JQYCEVDMSA-N	123796	(2S,3S,4S,5R,6R)-3,4,5-trihydroxy-6-[[(3R,5R,8R,9S,10S,13S,14S,17S)-17-[(1S)-1-hydroxyethyl]-10,13-dimethyl-2,3,4,5,6,7,8,9,11,12,14,15,16,17-tetradecahydro-1H-cyclopenta[a]phenanthren-3-yl]oxy]oxane-2-carboxylic acid
Pregnanetriol	C21H36O3	1098-45-9	CHEBI_34464	C[C@@H]([C@]1(CC[C@@H]2[C@@]1(CC[C@H]3[C@H]2CC[C@H]4[C@@]3(CC[C@H](C4)O)C)C)O)O	InChI=1S/C21H36O3/c1-13(22)21(24)11-8-18-16-5-4-14-12-15(23)6-9-19(14,2)17(16)7-10-20(18,21)3/h13-18,22-24H,4-12H2,1-3H3/t13-,14+,15+,16+,17-,18-,19-,20-,21-/m0/s1	SCPADBBISMMJAW-UHHUKTEYSA-N	101967	(3R,5R,8R,9S,10S,13S,14S,17R)-17-[(1S)-1-hydroxyethyl]-10,13-dimethyl-1,2,3,4,5,6,7,8,9,11,12,14,15,16-tetradecahydrocyclopenta[a]phenanthrene-3,17-diol
Pregnanetriolone	C21H34O4	603-99-6	CHEBI_79870	C[C@@H]([C@]1(CC[C@@H]2[C@@]1(CC(=O)[C@H]3[C@H]2CC[C@H]4[C@@]3(CC[C@H](C4)O)C)C)O)O	InChI=1S/C21H34O4/c1-12(22)21(25)9-7-16-15-5-4-13-10-14(23)6-8-19(13,2)18(15)17(24)11-20(16,21)3/h12-16,18,22-23,25H,4-11H2,1-3H3/t12-,13+,14+,15-,16-,18+,19-,20-,21-/m0/s1	WKFXHNDWEHDGQD-ZQRGSSBZSA-N	254631	(3R,5R,8S,9S,10S,13S,14S,17R)-3,17-dihydroxy-17-[(1S)-1-hydroxyethyl]-10,13-dimethyl-2,3,4,5,6,7,8,9,12,14,15,16-dodecahydro-1H-cyclopenta[a]phenanthren-11-one
Pregnanolone	C21H34O2	128-20-1	CHEBI_1712	CC(=O)[C@H]1CC[C@@H]2[C@@]1(CC[C@H]3[C@H]2CC[C@H]4[C@@]3(CC[C@H](C4)O)C)C	InChI=1S/C21H34O2/c1-13(22)17-6-7-18-16-5-4-14-12-15(23)8-10-20(14,2)19(16)9-11-21(17,18)3/h14-19,23H,4-12H2,1-3H3/t14-,15-,16+,17-,18+,19+,20+,21-/m1/s1	AURFZBICLPNKBZ-YZRLXODZSA-N	31402	1-[(3R,5R,8R,9S,10S,13S,14S,17S)-3-hydroxy-10,13-dimethyl-2,3,4,5,6,7,8,9,11,12,14,15,16,17-tetradecahydro-1H-cyclopenta[a]phenanthren-17-yl]ethanone
Pregnenediol	C21H34O2	901-56-4	CHEBI_166781	C[C@@H]([C@H]1CC[C@@H]2[C@@]1(CC[C@H]3[C@H]2CC=C4[C@@]3(CC[C@@H](C4)O)C)C)O	InChI=1S/C21H34O2/c1-13(22)17-6-7-18-16-5-4-14-12-15(23)8-10-20(14,2)19(16)9-11-21(17,18)3/h4,13,15-19,22-23H,5-12H2,1-3H3/t13-,15-,16-,17+,18-,19-,20-,21+/m0/s1	QAAQQTDJEXMIMF-YZXCLFAISA-N	94194	(3S,8S,9S,10R,13S,14S,17S)-17-[(1S)-1-hydroxyethyl]-10,13-dimethyl-2,3,4,7,8,9,11,12,14,15,16,17-dodecahydro-1H-cyclopenta[a]phenanthren-3-ol
Pregnenetriol	C21H34O3	903-67-3	CHEBI_746900	C[C@@H]([C@]1(CC[C@@H]2[C@@]1(CC[C@H]3[C@H]2CC=C4[C@@]3(CC[C@@H](C4)O)C)C)O)O	InChI=1S/C21H34O3/c1-13(22)21(24)11-8-18-16-5-4-14-12-15(23)6-9-19(14,2)17(16)7-10-20(18,21)3/h4,13,15-18,22-24H,5-12H2,1-3H3/t13-,15-,16+,17-,18-,19-,20-,21-/m0/s1	XGUQCUDPXSTKLI-PUOFRWEFSA-N	150863	(3S,8R,9S,10R,13S,14S,17R)-17-[(1S)-1-hydroxyethyl]-10,13-dimethyl-1,2,3,4,7,8,9,11,12,14,15,16-dodecahydrocyclopenta[a]phenanthrene-3,17-diol
Pregnenolone	C21H32O2	145-13-1	CHEBI_16581	CC(=O)[C@H]1CC[C@@H]2[C@@]1(CC[C@H]3[C@H]2CC=C4[C@@]3(CC[C@@H](C4)O)C)C	InChI=1S/C21H32O2/c1-13(22)17-6-7-18-16-5-4-14-12-15(23)8-10-20(14,2)19(16)9-11-21(17,18)3/h4,15-19,23H,5-12H2,1-3H3/t15-,16-,17+,18-,19-,20-,21+/m0/s1	ORNBQBCIOKFOEO-QGVNFLHTSA-N	8955	1-[(3S,8S,9S,10R,13S,14S,17S)-3-hydroxy-10,13-dimethyl-2,3,4,7,8,9,11,12,14,15,16,17-dodecahydro-1H-cyclopenta[a]phenanthren-17-yl]ethanone
Pregnenolone 13C2 d2	C21H32O2	2483824-26-4		[2H]C1(C[C@H]2[C@@H]3CC=C4C[C@H](CC[C@@]4([C@H]3CC[C@@]2([C@H]1[13C](=O)[13CH3])C)C)O)[2H]	InChI=1S/C21H32O2/c1-13(22)17-6-7-18-16-5-4-14-12-15(23)8-10-20(14,2)19(16)9-11-21(17,18)3/h4,15-19,23H,5-12H2,1-3H3/t15-,16-,17+,18-,19-,20-,21+/m0/s1/i1+1,6D2,13+1	ORNBQBCIOKFOEO-KXHQNKTISA-N	117064627	1-[(3S,8S,9S,10R,13S,14S,17S)-16,16-dideuterio-3-hydroxy-10,13-dimethyl-1,2,3,4,7,8,9,11,12,14,15,17-dodecahydrocyclopenta[a]phenanthren-17-yl](1,2-13C2)ethanone
Pregnenolone 3-Sulfate	C21H32O5S	1247-64-9	CHEBI_35420	CC(=O)[C@H]1CC[C@@H]2[C@@]1(CC[C@H]3[C@H]2CC=C4[C@@]3(CC[C@@H](C4)OS(=O)(=O)O)C)C	InChI=1S/C21H32O5S/c1-13(22)17-6-7-18-16-5-4-14-12-15(26-27(23,24)25)8-10-20(14,2)19(16)9-11-21(17,18)3/h4,15-19H,5-12H2,1-3H3,(H,23,24,25)/t15-,16-,17+,18-,19-,20-,21+/m0/s1	DIJBBUIOWGGQOP-QGVNFLHTSA-N	105074	[(3S,8S,9S,10R,13S,14S,17S)-17-acetyl-10,13-dimethyl-2,3,4,7,8,9,11,12,14,15,16,17-dodecahydro-1H-cyclopenta[a]phenanthren-3-yl] hydrogen sulfate
Progesterone	C21H30O2	57-83-0	CHEBI_17026	CC(=O)[C@H]1CC[C@@H]2[C@@]1(CC[C@H]3[C@H]2CCC4=CC(=O)CC[C@]34C)C	InChI=1S/C21H30O2/c1-13(22)17-6-7-18-16-5-4-14-12-15(23)8-10-20(14,2)19(16)9-11-21(17,18)3/h12,16-19H,4-11H2,1-3H3/t16-,17+,18-,19-,20-,21+/m0/s1	RJKFOVLPORLFTN-LEKSSAKUSA-N	5994	(8S,9S,10R,13S,14S,17S)-17-acetyl-10,13-dimethyl-1,2,6,7,8,9,11,12,14,15,16,17-dodecahydrocyclopenta[a]phenanthren-3-one
Progesterone 13C3	C21H30O2	327048-87-3		CC(=O)[C@H]1CC[C@@H]2[C@@]1(CC[C@H]3[C@H]2CCC4=[13CH][13C](=O)[13CH2]C[C@]34C)C	InChI=1S/C21H30O2/c1-13(22)17-6-7-18-16-5-4-14-12-15(23)8-10-20(14,2)19(16)9-11-21(17,18)3/h12,16-19H,4-11H2,1-3H3/t16-,17+,18-,19-,20-,21+/m0/s1/i8+1,12+1,15+1	RJKFOVLPORLFTN-TZDZRSEPSA-N	12303990	(8S,9S,10R,13S,14S,17S)-17-acetyl-10,13-dimethyl-1,2,6,7,8,9,11,12,14,15,16,17-dodecahydrocyclopenta[a]phenanthren-3-one
Testosterone	C19H28O2	58-22-0	CHEBI_17347	C[C@]12CC[C@H]3[C@H]([C@@H]1CC[C@@H]2O)CCC4=CC(=O)CC[C@]34C	InChI=1S/C19H28O2/c1-18-9-7-13(20)11-12(18)3-4-14-15-5-6-17(21)19(15,2)10-8-16(14)18/h11,14-17,21H,3-10H2,1-2H3/t14-,15-,16-,17-,18-,19-/m0/s1	MUMGGOZAMZWBJJ-DYKIIFRCSA-N	6013	(8R,9S,10R,13S,14S,17S)-17-hydroxy-10,13-dimethyl-1,2,6,7,8,9,11,12,14,15,16,17-dodecahydrocyclopenta[a]phenanthren-3-one
Testosterone 13C3	C19H28O2	327048-83-9		C[C@]12CC[C@H]3[C@H]([C@@H]1CC[C@@H]2O)CCC4=[13CH][13C](=O)[13CH2]C[C@]34C	InChI=1S/C19H28O2/c1-18-9-7-13(20)11-12(18)3-4-14-15-5-6-17(21)19(15,2)10-8-16(14)18/h11,14-17,21H,3-10H2,1-2H3/t14-,15-,16-,17-,18-,19-/m0/s1/i7+1,11+1,13+1	MUMGGOZAMZWBJJ-KRMLYXHASA-N	12304601	(8R,9S,10R,13S,14S,17S)-17-hydroxy-10,13-dimethyl-1,2,6,7,8,9,11,12,14,15,16,17-dodecahydrocyclopenta[a]phenanthren-3-one
Testosterone 17β-Glucuronide	C25H36O8	1180-25-2	CHEBI_28835	C[C@]12CC[C@H]3[C@H]([C@@H]1CC[C@@H]2O[C@H]4[C@@H]([C@H]([C@@H]([C@H](O4)C(=O)O)O)O)O)CCC5=CC(=O)CC[C@]35C	InChI=1S/C25H36O8/c1-24-9-7-13(26)11-12(24)3-4-14-15-5-6-17(25(15,2)10-8-16(14)24)32-23-20(29)18(27)19(28)21(33-23)22(30)31/h11,14-21,23,27-29H,3-10H2,1-2H3,(H,30,31)/t14-,15-,16-,17-,18-,19-,20+,21-,23+,24-,25-/m0/s1	NIKZPECGCSUSBV-HMAFJQTKSA-N	108192	(2S,3S,4S,5R,6R)-6-[[(8R,9S,10R,13S,14S,17S)-10,13-dimethyl-3-oxo-1,2,6,7,8,9,11,12,14,15,16,17-dodecahydrocyclopenta[a]phenanthren-17-yl]oxy]-3,4,5-trihydroxyoxane-2-carboxylic acid
Testosterone 17β-Sulfate	C19H28O5S	651-45-6	CHEBI_84094	C[C@]12CC[C@H]3[C@H]([C@@H]1CC[C@@H]2OS(=O)(=O)O)CCC4=CC(=O)CC[C@]34C	InChI=1S/C19H28O5S/c1-18-9-7-13(20)11-12(18)3-4-14-15-5-6-17(24-25(21,22)23)19(15,2)10-8-16(14)18/h11,14-17H,3-10H2,1-2H3,(H,21,22,23)/t14-,15-,16-,17-,18-,19-/m0/s1	WAQBISPOEAOCOG-DYKIIFRCSA-N	119207	[(8R,9S,10R,13S,14S,17S)-10,13-dimethyl-3-oxo-1,2,6,7,8,9,11,12,14,15,16,17-dodecahydrocyclopenta[a]phenanthren-17-yl] hydrogen sulfate
Tetrahydro-11-dehydrocorticosterone	C21H32O4	566-03-0	CHEBI_746901	C[C@]12CC[C@H](C[C@H]1CC[C@@H]3[C@@H]2C(=O)C[C@]4([C@H]3CC[C@@H]4C(=O)CO)C)O	InChI=1S/C21H32O4/c1-20-8-7-13(23)9-12(20)3-4-14-15-5-6-16(18(25)11-22)21(15,2)10-17(24)19(14)20/h12-16,19,22-23H,3-11H2,1-2H3/t12-,13-,14+,15+,16-,19-,20+,21+/m1/s1	XWYBFXIUISNTQG-RHBMFIQRSA-N	223684	(3R,5R,8S,9S,10S,13S,14S,17S)-3-hydroxy-17-(2-hydroxyacetyl)-10,13-dimethyl-1,2,3,4,5,6,7,8,9,12,14,15,16,17-tetradecahydrocyclopenta[a]phenanthren-11-one
Tetrahydro-11-deoxycorticosterone	C21H34O3	567-03-3	CHEBI_746902	C[C@]12CC[C@H](C[C@H]1CC[C@@H]3[C@@H]2CC[C@]4([C@H]3CC[C@@H]4C(=O)CO)C)O	InChI=1S/C21H34O3/c1-20-9-7-14(23)11-13(20)3-4-15-16-5-6-18(19(24)12-22)21(16,2)10-8-17(15)20/h13-18,22-23H,3-12H2,1-2H3/t13-,14-,15+,16+,17+,18-,20+,21+/m1/s1	CYKYBWRSLLXBOW-DATPGIFZSA-N	9974162	2-hydroxy-1-[(3R,5R,8R,9S,10S,13S,14S,17S)-3-hydroxy-10,13-dimethyl-2,3,4,5,6,7,8,9,11,12,14,15,16,17-tetradecahydro-1H-cyclopenta[a]phenanthren-17-yl]ethanone
Tetrahydro-11-deoxycortisol	C21H34O4	68-60-0	CHEBI_34352	C[C@]12CC[C@H](C[C@H]1CC[C@@H]3[C@@H]2CC[C@]4([C@H]3CC[C@@]4(C(=O)CO)O)C)O	InChI=1S/C21H34O4/c1-19-8-5-14(23)11-13(19)3-4-15-16(19)6-9-20(2)17(15)7-10-21(20,25)18(24)12-22/h13-17,22-23,25H,3-12H2,1-2H3/t13-,14-,15-,16+,17+,19+,20+,21+/m1/s1	UPTAPIKFKZGAGM-FAIYVORSSA-N	65555	1-[(3R,5R,8R,9S,10S,13S,14S,17R)-3,17-dihydroxy-10,13-dimethyl-1,2,3,4,5,6,7,8,9,11,12,14,15,16-tetradecahydrocyclopenta[a]phenanthren-17-yl]-2-hydroxyethanone
Ursodeoxycholic Acid	C24H40O4	128-13-2	CHEBI_9907	C[C@H](CCC(=O)O)[C@H]1CC[C@@H]2[C@@]1(CC[C@H]3[C@H]2[C@H](C[C@H]4[C@@]3(CC[C@H](C4)O)C)O)C	InChI=1S/C24H40O4/c1-14(4-7-21(27)28)17-5-6-18-22-19(9-11-24(17,18)3)23(2)10-8-16(25)12-15(23)13-20(22)26/h14-20,22,25-26H,4-13H2,1-3H3,(H,27,28)/t14-,15+,16-,17-,18+,19+,20+,22+,23+,24-/m1/s1	RUDATBOHQWOJDD-UZVSRGJWSA-N	31401	(4R)-4-[(3R,5S,7S,8R,9S,10S,13R,14S,17R)-3,7-dihydroxy-10,13-dimethyl-2,3,4,5,6,7,8,9,11,12,14,15,16,17-tetradecahydro-1H-cyclopenta[a]phenanthren-17-yl]pentanoic acid
