# Supplementary material for: Cannabis consumption is associated with altered steroid metabolism in young men
Source: Commun Med (Lond). 2026 Apr 16;6:224. doi: 10.1038/s43856-026-01469-x (PMC13087242; doi:10.1038/s43856-026-01469-x)
Supplement: Supplementary file 5 — Supplementary Data 2 [file 43856_2026_1469_MOESM5_ESM.xlsx]

## Sheet: SuppData-2
Compound	Class	Retention Time	Polarity	Precursor m/z	Product m/z	Internal Standard	Class	RT	POS / NEG	Precursor m/z	Product m/z
11A-hydroxyprogesterone	Progestogen	9.43	+	331.66	313.034	17A-hydroxyprogesterone_13C3	Progestogen	10.69	+	334.179	111.986
11B-hydroxyandrostenedione	Androgen	8.98	+	303.332	121.082	Testosterone_13C3	Androgen	10.64	+	292.476	99.9403
11B-hydroxyetiocholanedione	Androgen	9.58	+	287.158	269.053	Testosterone_13C3	Androgen	10.64	+	292.476	99.9403
11B-hydroxyprogesterone	Progestogen	11.16	+	331.651	313.125	17A-hydroxyprogesterone_13C3	Progestogen	10.69	+	334.179	111.986
11B-hydroxytestosterone	Androgen	7.77	+	305.433	121.071	Testosterone_13C3	Androgen	10.64	+	292.476	99.9403
11-dehydrocorticosterone	Corticosteroid	9.13	+	345.212	121.015	11-deoxycortisol_13C3	Corticosteroid	9.07	+	350.169	112.011
11-deoxycortisol	Corticosteroid	9.08	+	347.2	109.1	11-deoxycortisol_13C3	Corticosteroid	9.07	+	350.169	112.011
11-ketoandrostenedione	Androgen	9.02	+	301.649	257.063	Testosterone_13C3	Androgen	10.64	+	292.476	99.9403
11-ketoetiocholanolone Glucuronide	Glucuronide	7.15	-	479.221	74.9817	Cortisone_13C3	Corticosteroid	6.65	-	362.058	331.968
11-ketotestosterone	Androgen	8.1	+	303.197	120.991	Testosterone_13C3	Androgen	10.64	+	292.476	99.9403
16A-hydroxyandrostenedione	Androgen	8.36	+	303.654	96.9325	Testosterone_13C3	Androgen	10.64	+	292.476	99.9403
16A-hydroxyprogesterone	Progestogen	9.67	+	331.56	96.9041	17A-hydroxyprogesterone_13C3	Progestogen	10.69	+	334.179	111.986
16A-hydroxytestosterone	Androgen	7.17	+	305.172	97.0085	Testosterone_13C3	Androgen	10.64	+	292.476	99.9403
16B-hydroxytestosterone	Androgen	9	+	305.172	97.0085	Testosterone_13C3	Androgen	10.64	+	292.476	99.9403
17A,20A-dihydroxyprogesterone	Progestogen	10.06	+	333.637	96.9408	17A-hydroxyprogesterone_13C3	Progestogen	10.69	+	334.179	111.986
17A-hydroxypregnenolone	Progestogen	8.47	-	331.193	287.094	17A-hydroxyprogesterone_13C3	Progestogen	10.69	-	332.067	287.942
17A-hydroxyprogesterone	Progestogen	10.69	+	331.193	109.061	17A-hydroxyprogesterone_13C3	Progestogen	10.69	+	334.179	111.986
18-hydroxycortisol	Corticosteroid	4.5	+	379.225	267.1	Cortisol_13C3	Corticosteroid	5.98	+	366.167	124.024
19-hydroxy-DHEA Sulfate	Sulfate	3.99	-	383.146	79.8169	Cortisone_13C3	Corticosteroid	6.65	-	362.058	331.968
19-nortestosterone	Androgen	10.65	+	275.204	144.987	Testosterone_13C3	Androgen	10.64	+	292.476	99.9403
20A-cortolone	Corticosteroid	6.2	-	365.182	335.137	Cortisone_13C3	Corticosteroid	6.65	-	362.058	331.968
20A-dihydrocortisol	Corticosteroid	4.96	+	365.677	120.994	Cortisol_13C3	Corticosteroid	5.98	+	366.167	124.024
20A-dihydrocortisone	Corticosteroid	5.82	+	363.153	163.088	Cortisol_13C3	Corticosteroid	5.98	+	366.167	124.024
20A-dihydroprogesterone	Progestogen	12.46	+	317.722	96.9643	Progesterone_13C3	Progestogen	14	+	318.551	99.962
20A-hydroxycholesterol	Oxysterol	14.27	+	385.308	159.015	Progesterone_13C3	Progestogen	14	+	318.551	99.962
20B-cortol	Corticosteroid	5.55	-	367.172	337.154	Cortisone_13C3	Corticosteroid	6.65	-	362.058	331.968
20B-cortolone	Corticosteroid	6.62	-	365.184	335.146	Cortisone_13C3	Corticosteroid	6.65	-	362.058	331.968
20B-dihydrocortisol	Corticosteroid	5.53	+	365.574	269.117	Cortisol_13C3	Corticosteroid	5.98	+	366.167	124.024
20B-dihydrocortisone	Corticosteroid	6.21	+	363.621	163.049	Cortisol_13C3	Corticosteroid	5.98	+	366.167	124.024
21-deoxycortisol	Corticosteroid	7.1	+	347.2	121.1	Cortisone_13C3	Corticosteroid	6.65	+	364.136	166.075
22A-hydroxycholesterol	Oxysterol	13.65	+	367.309	147.013	Progesterone_13C3	Progestogen	14	+	318.551	99.962
2-hydroxyestriol	Estrogen	5.98	+	287.118	172.979	Cortisol_13C3	Corticosteroid	5.98	+	366.167	124.024
3A,5A-tetrahydrocortisol	Corticosteroid	5.38	-	411.212	335.159	Cortisone_13C3	Corticosteroid	6.65	-	362.058	331.968
3A,5B tetrahydrocortisol	Corticosteroid	5.66	-	411.212	335.159	Cortisone_13C3	Corticosteroid	6.65	-	362.058	331.968
3A,5B-tetrahydrocortisone	Corticosteroid	6.69	+	347.439	149.051	Cortisone_13C3	Corticosteroid	6.65	+	364.136	166.075
4-methoxyestradiol	Estrogen	8.09	-	301.107	286.028	11-deoxycortisol_13C3	Corticosteroid	9.07	-	348.07	318.024
5A-dihydrocortisol	Corticosteroid	6.67	-	409.238	333.151	Cortisone_13C3	Corticosteroid	6.65	-	362.058	331.968
5A,20A-tetrahydroprogesterone	Progestogen	12.69	+	319.255	95.0098	Progesterone_13C3	Progestogen	14	+	318.551	99.962
5A-dihydrocortisone	Corticosteroid	7.36	-	407.218	331.145	Cortisone_13C3	Corticosteroid	6.65	-	362.058	331.968
5A-dihydrotestosterone 17b-Glucuronide	Glucuronide	10.71	-	465.281	74.9768	17A-hydroxyprogesterone_13C3	Progestogen	10.69	-	332.067	287.942
5A-dihydrotestosterone (DHT)	Androgen	11.24	+	291.687	255.14	Testosterone_13C3	Androgen	10.64	+	292.476	99.9403
5B-dihydroprogesterone	Progestogen	13.96	+	299.503	90.9157	Progesterone_13C3	Progestogen	14	+	318.551	99.962
6A-hydroxypregnanolone	Progestogen	8.47	+	299.191	281.061	17A-hydroxyprogesterone_13C3	Progestogen	10.69	+	334.179	111.986
6A-hydroxytestosterone	Androgen	4.9	+	305.327	145.059	Testosterone_13C3	Androgen	10.64	+	292.476	99.9403
7B-hydroxy-DHEA	Androgen	5.1	+	287.301	211.045	Testosterone_13C3	Androgen	10.64	+	292.476	99.9403
7-ketocholesterol	Oxysterol	15.89	+	401.243	95.0366	Progesterone_13C3	Progestogen	14	+	318.551	99.962
Aldosterone	Corticosteroid	7.63	+	361.2	97.1	Cortisone_13C3	Corticosteroid	6.65	+	364.136	166.075
Androstenedione	Androgen	11.93	+	287.635	96.9597	Androstenedione_13C3	Androgen	11.91	+	290.305	99.9458
Androsterone	Androgen	10.88	+	273.307	147.02	Testosterone_13C3	Androgen	10.64	+	292.476	99.9403
Androsterone 3A-Glucuronide	Glucuronide	9.55	-	465.365	113.007	11-deoxycortisol_13C3	Corticosteroid	9.07	-	348.07	318.024
Chenodeoxycholic acid	Bile Acid	12.29	-	437.3	391.3	17A-hydroxyprogesterone_13C3	Progestogen	10.69	-	332.067	287.942
Cholic acid	Bile Acid	10.99	-	407.3	407.3	17A-hydroxyprogesterone_13C3	Progestogen	10.69	-	332.067	287.942
Compound	Class	Retention Time	Polarity	Precursor m/z	Product m/z	Internal Standard	Class	RT	POS / NEG	Precursor m/z	Product m/z
Corticosterone	Corticosteroid	9.42	+	347.2	121.1	11-deoxycortisol_13C3	Corticosteroid	9.07	+	350.169	112.011
Cortisol	Corticosteroid	5.97	+	363.2	121	Cortisol_13C3	Corticosteroid	5.98	+	366.167	124.024
Cortisone	Corticosteroid	6.66	+	361.2	163	Cortisone_13C3	Corticosteroid	6.65	+	364.136	166.075
DHEA	Androgen	10.14	+	271.372	253.096	Testosterone_13C3	Androgen	10.64	+	292.476	99.9403
DHEA Glucuronide	Glucuronide	8.59	-	463.317	84.8897	11-deoxycortisol_13C3	Corticosteroid	9.07	-	348.07	318.024
Epitestosterone	Androgen	10.37	+	289.4	97.04	Testosterone_13C3	Androgen	10.64	+	292.476	99.9403
Epitestosterone 17A-Glucuronide	Glucuronide	9.21	-	463.251	84.8844	11-deoxycortisol_13C3	Corticosteroid	9.07	-	348.07	318.024
Epitestosterone 17A-Sulfate	Sulfate	7.47	+	369.254	97.0207	Testosterone_13C3	Androgen	10.64	+	292.476	99.9403
Estrone 3-Glucuronide	Glucuronide	7.49	-	445.193	269.111	Cortisone_13C3	Corticosteroid	6.65	-	362.058	331.968
Estrone E1	Estrogen	9.68	-	269.123	145.034	11-deoxycortisol_13C3	Corticosteroid	9.07	-	348.07	318.024
Estrone Sulfate	Sulfate	6.7	-	349.1	269.2	Cortisone_13C3	Corticosteroid	6.65	-	362.058	331.968
Etiocholanolone Glucuronide	Glucuronide	9.92	-	465.603	74.8869	11-deoxycortisol_13C3	Corticosteroid	9.07	-	348.07	318.024
Glycochenodeoxycholic acid	Bile Acid	10.89	-	448.407	74.0097	17A-hydroxyprogesterone_13C3	Progestogen	10.69	-	332.067	287.942
Glycoursodeoxycholic acid	Bile Acid	8.38	-	448.542	74.0095	11-deoxycortisol_13C3	Corticosteroid	9.07	-	348.07	318.024
Pregnanediol Glucuronide	Glucuronide	10.51	-	495.398	84.899	17A-hydroxyprogesterone_13C3	Progestogen	10.69	-	332.067	287.942
Pregnanetriol	Progestogen	10.65	+	337.325	302.185	17A-hydroxyprogesterone_13C3	Progestogen	10.69	+	334.179	111.986
Pregnenediol	Progestogen	9.93	+	283.198	104.991	17A-hydroxyprogesterone_13C3	Progestogen	10.69	+	334.179	111.986
Pregnenetriol	Progestogen	7.59	-	317.153	287.055	17A-hydroxyprogesterone_13C3	Progestogen	10.69	-	332.067	287.942
Pregnenolone	Progestogen	12.1	+	317.284	159.044	Pregnenolone_13C2_d2	Progestogen	12.05	+	321.193	159.012
Pregnenolone-3-sulfate	Sulfate	9.73	-	395.168	96.8427	17A-hydroxyprogesterone_13C3	Progestogen	10.69	-	332.067	287.942
Progesterone	Progestogen	14.01	+	315.157	97.0431	Progesterone_13C3	Progestogen	14	+	318.551	99.962
Testosterone	Androgen	10.64	+	289.4	97.04	Testosterone_13C3	Androgen	10.64	+	292.476	99.9403
Testosterone 17B-Glucuronide	Glucuronide	9.97	-	463.341	74.9622	17A-hydroxyprogesterone_13C3	Progestogen	10.69	-	332.067	287.942
Testosterone 17B-Sulfate	Sulfate	8.06	+	369.399	97.0207	Testosterone_13C3	Androgen	10.64	+	292.476	99.9403
Ursodeoxycholic acid	Bile Acid	10.03	-	391.3	391.3	17A-hydroxyprogesterone_13C3	Progestogen	10.69	-	332.067	287.942
