# Supplementary material for: Cannabis consumption is associated with altered steroid metabolism in young men
Source: Commun Med (Lond). 2026 Apr 16;6:224. doi: 10.1038/s43856-026-01469-x (PMC13087242; doi:10.1038/s43856-026-01469-x)
Supplement: Supplementary file 6 — Supplementary Data 3 [file 43856_2026_1469_MOESM6_ESM.xlsx]

## Sheet: SuppData-3
Molecule	RT	POS / NEG	Precursor m/z	Product m/z	CV (QC)	Missingness
11A-hydroxyprogesterone	9.43	+	331.66	313.034	0.114748	0.0319149
11B-hydroxyandrostenedione	8.98	+	303.332	121.082	0.0938685	0
11B-hydroxyetiocholanedione	9.58	+	287.158	269.053	0.526057	0.0212766	* removed from the analysis
11B-hydroxyprogesterone	11.16	+	331.651	313.125	0.0684247	0.308511
11B-Hydroxytestosterone	7.77	+	305.433	121.071	0.095012	0
11-dehydrocorticosterone	9.13	+	345.212	121.015	0.0528179	0
11-deoxycortisol	9.08	+	347.2	109.1	0.0182375	0
11-ketoandrostenedione (Adrenosterone)	9.02	+	301.649	257.063	0.109891	0
11-ketoetiocholanolone Glucuronide	7.15	-	479.221	74.9817	0.295163	0
11-ketotestosterone	8.1	+	303.197	120.991	0.0553718	0
16A-hydroxyandrostenedione	8.36	+	303.654	96.9325	0.185851	0
16A-hydroxyprogesterone	9.67	+	331.56	96.9041	0.252616	0
16A-hydroxytestosterone	7.17	+	305.172	97.0085	0.10457	0
16B-hydroxytestosterone	9	+	305.172	97.0085	0.450498	0	* removed from the analysis
17A-20A-dihydroxyprogesterone	10.06	+	333.637	96.9408	0.0395597	0
17A-hydroxypregnenolone	8.47	-	331.193	287.094	0.171711	0
17A-hydroxyprogesterone	10.69	+	331.193	109.061	0.0803008	0
18-hydroxycortisol	4.5	+	379.225	267.1	0.0353572	0
19-hydroxy-DHEA Sulfate	3.99	-	383.146	79.8169	0.064225	0
19-nortestosterone	10.65	+	275.204	144.987	0.232355	0.0531915
20A-Cortolone	6.2	-	365.182	335.137	0.154126	0
20A-dihydrocortisol	4.96	+	365.677	120.994	0.0458236	0
20A-dihydrocortisone	5.82	+	363.153	163.088	0.102461	0
20A-dihydroprogesterone	12.46	+	317.722	96.9643	0.239053	0
20A-hydroxycholesterol	14.27	+	385.308	159.015	0.274635	0
20B-cortol	5.55	-	367.172	337.154	0.113867	0
20B-cortolone	6.62	-	365.184	335.146	0.161747	0
20B-dihydrocortisol	5.53	+	365.574	269.117	0.0559177	0
20B-dihydrocortisone	6.21	+	363.621	163.049	0.0644291	0
21-deoxycortisol	7.1	+	347.2	121.1	0.575322	0.329787	* removed from the analysis
22A-hydroxycholesterol	13.65	+	367.309	147.013	0.173677	0
2-hydroxyestriol	5.98	+	287.118	172.979	0.161724	0
3A-5A-tetrahydrocortisol	5.38	-	411.212	335.159	0.104149	0
3A-5B-tetrahydrocortisol	5.66	-	411.212	335.159	0.110987	0
3A-5B-tetrahydrocortisone	6.69	+	347.439	149.051	0.0718418	0
4-methoxyestradiol	8.09	-	301.107	286.028	0.279094	0.0106383
5A-dihydrocortisol	6.67	-	409.238	333.151	0.058632	0
5A-20A-tetrahydroprogesterone	12.69	+	319.255	95.0098	0.0803683	0.0957447
5A-dihydrocortisone	7.36	-	407.218	331.145	0.077168	0
5A-dihydrotestosterone 17B-Glucuronide	10.71	-	465.281	74.9768	0.151871	0
5A-dihydrotestosterone (DHT)	11.24	+	291.687	255.14	0.0885052	0
5B-dihydroprogesterone	13.96	+	299.503	90.9157	0.254843	0.43617
6A-hydroxypregnanolone	8.47	+	299.191	281.061	0.0615183	0.0212766
6A-hydroxytestosterone	4.9	+	305.327	145.059	0.131307	0
7B-hydroxy-DHEA	5.1	+	287.301	211.045	0.305579	0	* removed from the analysis
7-ketocholesterol	15.89	+	401.243	95.0366	0.576383	0	* removed from the analysis
Aldosterone	7.63	+	361.2	97.1	0.233378	0.0319149
Androstenedione	11.93	+	287.635	96.9597	0.045185	0
Androsterone	10.88	+	273.307	147.02	0.119539	0
Androsterone 3A-Glucuronide	9.55	-	465.365	113.007	0.106898	0
Chenodeoxycholic acid	12.29	-	437.3	391.3	0.221691	0
Cholic acid	10.99	-	407.3	407.3	0.182242	0
Corticosterone	9.42	+	347.2	121.1	0.0209364	0
Cortisol	5.97	+	363.2	121	0.0173768	0
Cortisone	6.66	+	361.2	163	0.0253718	0
DHEA	10.14	+	271.372	253.096	0.0455361	0
DHEA Glucuronide	8.59	-	463.317	84.8897	0.0936707	0
Epitestosterone	10.37	+	289.4	97.04	0.0674329	0
Epitestosterone 17A-Glucuronide	9.21	-	463.251	84.8844	0.0756487	0
Epitestosterone 17a-Sulfate	7.47	+	369.254	97.0207	0.223614	0
Estrone 3-Glucuronide	7.49	-	445.193	269.111	0.181936	0
Estrone E1	9.68	-	269.123	145.034	0.344104	0	* removed from the analysis
Estrone Sulfate	6.7	-	349.1	269.2	0.119686	0
Etiocholanolone Glucuronide	9.92	-	465.603	74.8869	0.105073	0
Glycochenodeoxycholic acid	10.89	-	448.407	74.0097	0.21726	0
Glycoursodeoxycholic acid	8.38	-	448.542	74.0095	0.102094	0
Pregnanediol Glucuronide	10.51	-	495.398	84.899	0.179704	0
Pregnanetriol	10.65	+	337.325	302.185	0.0819757	0
Pregnenediol	9.93	+	283.198	104.991	0.0364712	0
Pregnenetriol	7.59	-	317.153	287.055	0.189626	0
Pregnenolone	12.1	+	317.284	159.044	0.0683433	0.0212766
Pregnenolone-3-sulfate	9.73	-	395.168	96.8427	0.187348	0
Progesterone	14.01	+	315.157	97.0431	0.0340499	0
Testosterone	10.64	+	289.4	97.04	0.0285642	0
Testosterone 17b-Glucuronide	9.97	-	463.341	74.9622	0.19468	0.0212766
Testosterone 17b-Sulfate	8.06	+	369.399	97.0207	0.323767	0	* removed from the analysis
Ursodeoxycholic acid	10.03	-	391.3	391.3	0.18981	0
