# Supplementary material for: Cannabis consumption is associated with altered steroid metabolism in young men
Source: Commun Med (Lond). 2026 Apr 16;6:224. doi: 10.1038/s43856-026-01469-x (PMC13087242; doi:10.1038/s43856-026-01469-x)
Supplement: Supplementary file 7 — Supplementary Data 4 [file 43856_2026_1469_MOESM7_ESM.xlsx]

## Sheet: SuppData-4
	THC-positive / Chronic (n = 14)			THC-positive / Occasional (n = 33)			Difference between groups (Chronic - Occasional)
	Min	Max	Mean	Min	Max	Mean	Difference	p-value
A4	0.574758	1.9243	1.31	0.468385	2.05725	0.95	0.36	0.008 (**)
T	3.82318	7.92006	5.85	2.07404	9.27031	5.43	0.42	0.39 (ns)
17A-OHP4	0.335169	1.15206	0.66	0.152353	1.29618	0.64	0.02	0.82 (ns)
P4	0.0683056	0.150988	0.098	0.0531045	0.186558	0.091	0.007	0.49 (ns)
S	0.0968816	1.19321	0.44	0.0320731	1.14369	0.34	0.1	0.33 (ns)
F	49.0842	132.137	90.24	20.3833	132.475	83	7.249	0.48 (ns)
E	8.38147	18.7295	12.63	5.30713	21.0357	11.58	1.055	0.34 (ns)
