# Supplementary material for: Cannabis consumption is associated with altered steroid metabolism in young men
Source: Commun Med (Lond). 2026 Apr 16;6:224. doi: 10.1038/s43856-026-01469-x (PMC13087242; doi:10.1038/s43856-026-01469-x)
Supplement: Supplementary file 8 — Supplementary Data 5 [file 43856_2026_1469_MOESM8_ESM.xlsx]

## Sheet: Steroids-LC-MS-Data
			µg/L	µg/L
Compound		BMI	THC (Serum)	THC-COOH (Serum)	OCCAS/CHRON	TOBACCO	11A-hydroxyprogesterone	11B-Hydroxyandrostenedione	11B-hydroxyprogesterone	11B-Hydroxytestosterone	11-dehydrocorticosterone	11-Deoxycortisol	11-Ketoandrostenedione (Adrenosterone)	11-Ketoetiocholanolone Glucuronide	11-ketotestosterone	16A-hydroxyandrostenedione	16A-hydroxyprogesterone	16A-Hydroxytestosterone	17A-20A-dihydroxyprogesterone	17A-hydroxypregnenolone	17A-Hydroxyprogesterone	18-hydroxycortisol	19-hydroxy-DHEA Sulfate	19-nortestosterone	20A-Cortolone	20A-dihydrocortisol	20A-dihydrocortisone	20A-dihydroprogesterone	20a-hydroxycholesterol	20B-Cortol	20B-Cortolone	20B-dihydrocortisol	20B-dihydrocortisone	22a-hydroxycholesterol	2-hydroxyestriol	3A-5A-tetrahydrocortisol	3A-5B tetrahydrocortisol	3A-5B-tetrahydrocortisone	4-methoxyestradiol	5A-dihydrocortisol	5A-20A-tetrahydroprogesterone	5A-dihydrocortisone	5A-Dihydrotestosterone 17b-Glucuronide	5A-Dihydrotestosterone (DHT)	5B-dihydroprogesterone	6A-hydroxypregnanolone	6A-Hydroxytestosterone	Aldosterone	Androstenedione
Class							Progestogen	Androgen	Progestogen	Androgen	Corticosteroid	Corticosteroid	Androgen	Glucuronide	Androgen	Androgen	Progestogen	Androgen	Progestogen	Progestogen	Progestogen	Corticosteroid	Sulfate	Androgen	Corticosteroid	Corticosteroid	Corticosteroid	Progestogen	Cholesterol Derivative	Corticosteroid	Corticosteroid	Corticosteroid	Corticosteroid	Cholesterol Derivative	Estrogen	Corticosteroid	Corticosteroid	Corticosteroid	Estrogen	Corticosteroid	Progestogen	Corticosteroid	Glucuronide	Androgen	Progestogen	Progestogen	Androgen	Corticosteroid	Androgen
Precursor m/z							331.66	303.332	331.651	305.433	345.212	347.2	301.649	479.221	303.197	303.654	331.56	305.172	333.637	331.193	331.193	379.225	383.146	275.204	365.182	365.677	363.153	317.722	385.308	367.172	365.184	365.574	363.621	367.309	287.118	411.212	411.212	347.439	301.107	409.238	319.255	407.218	465.281	291.687	299.503	299.191	305.327	361.2	287.635
Product m/z							313.034	121.082	313.125	121.071	121.015	109.1	257.063	74.9817	120.991	96.9325	96.9041	97.0085	96.9408	287.094	109.061	267.1	79.8169	144.987	335.137	120.994	163.088	96.9643	159.015	337.154	335.146	269.117	163.049	147.013	172.979	335.159	335.159	149.051	286.028	333.151	95.0098	331.145	74.9768	255.14	90.9157	281.061	145.059	97.1	96.9597
RT							9.43	8.98	11.16	7.77	9.13	9.08	9.02	7.15	8.1	8.36	9.67	7.17	10.06	8.47	10.69	4.5	3.99	10.65	6.2	4.96	5.82	12.46	14.27	5.55	6.62	5.53	6.21	13.65	5.98	5.38	5.66	6.69	8.09	6.67	12.69	7.36	10.71	11.24	13.96	8.47	4.9	7.63	11.93
ctlQC-01	CTRL-QC						3.50819e+06	9.65476e+06	987634	2.8691e+06	3.30821e+07	2.75135e+07	3.92572e+06	1.01507e+06	1.29345e+07	848730	3.69154e+07	7.4959e+06	1.77472e+07	485344	2.65463e+07	1.53166e+06	1.1856e+06	1.0294e+06	367641	1.97607e+07	3.16549e+07	3.54939e+06	760932	212587	2.19314e+06	2.40638e+07	1.88779e+07	2.2551e+06	442373	744176	999205	1.30058e+06	103436	5.85925e+06	5.85927e+06	181258	552116	1.8475e+06	17808.6	3.81054e+07	3.25534e+06	220600	1.5512e+07
ctlQC-02	CTRL-QC						2.60759e+06	1.12031e+07	645723	2.21579e+06	3.42199e+07	2.84845e+07	4.47048e+06	902240	1.37809e+07	846255	3.48743e+07	6.99638e+06	1.52553e+07	660143	2.73096e+07	1.4378e+06	1.13717e+06	752491	377844	1.83251e+07	2.68476e+07	4.89224e+06	551385	200485	2.05481e+06	2.25722e+07	1.95556e+07	2.15613e+06	592138	784985	939498	1.49058e+06	123236	5.4179e+06	3.37102e+06	180379	599224	1.94972e+06	17808.6	3.09834e+07	3.14757e+06	89733.2	1.68761e+07
ctlQC-03	CTRL-QC						2.74368e+06	1.02193e+07	907850	2.4078e+06	3.2731e+07	2.8237e+07	4.9251e+06	695666	1.18185e+07	867514	3.23983e+07	5.60334e+06	1.42923e+07	550583	2.69909e+07	1.55845e+06	2.17782e+06	1.32457e+06	112497	1.88039e+07	3.64658e+07	5.79054e+06	453460	118412	1.93053e+06	2.55971e+07	9.54667e+06	1.44332e+06	535324	1.21254e+06	1.41006e+06	1.643e+06	107973	5.83408e+06	2.83301e+06	177172	756974	1.86613e+06	17808.6	3.12671e+07	3.25677e+06	270645	1.69546e+07
CTRL-001	CTRL	22.6474	0	0		0	1.63408e+06	8.87914e+06	8842.43	3.74492e+06	3.67424e+07	1.23041e+07	3.99228e+06	401481	2.17278e+07	512855	2.87113e+07	9.87953e+06	2.55494e+07	278767	2.67211e+07	3.52628e+06	845095	778153	401889	2.22922e+07	6.44797e+07	2.58479e+06	698833	250633	2.61704e+06	2.48696e+07	2.79332e+07	2.36271e+06	873025	515738	1.0731e+06	1.20927e+06	208636	5.47496e+06	5.7357e+06	117104	289461	2.47867e+06	17808.6	4.19651e+07	1.1265e+06	246006	1.24492e+07
CTRL-002	CTRL	21.3859	0	0		0.5	1.74211e+06	1.17005e+07	8842.43	2.40452e+06	5.07589e+07	2.81501e+07	4.04445e+06	1.01206e+06	1.61257e+07	982347	5.17956e+07	6.46676e+06	2.64017e+07	984414	3.92236e+07	1.74947e+06	895866	479653	321763	1.76833e+07	2.91342e+07	5.33916e+06	565544	250992	1.95108e+06	2.19978e+07	1.73416e+07	2.33771e+06	643549	613144	1.00421e+06	1.40659e+06	170175	6.7206e+06	4.41174e+06	170446	3.11526e+06	2.74221e+06	17808.6	1.73094e+07	2.66892e+06	70135.7	1.91821e+07
CTRL-003	CTRL	21.8776	0	0		0	1.98162e+06	6.59424e+06	1.12946e+06	1.89187e+06	2.08232e+07	1.0365e+07	3.04989e+06	465183	1.28735e+07	635134	1.69335e+07	8.67511e+06	1.63939e+07	309311	1.82078e+07	902625	1.10218e+06	1.04372e+06	329805	1.17399e+07	2.66776e+07	2.3615e+06	788771	180244	2.1676e+06	1.35066e+07	1.28291e+07	2.41132e+06	382640	676475	544774	1.2922e+06	116856	6.448e+06	3.06049e+06	168069	575155	2.68726e+06	17808.6	1.97157e+07	1.62296e+06	89894.6	1.12931e+07
CTRL-004	CTRL	22.206	0	0		0	3.28359e+06	1.04277e+07	8842.43	4.70816e+06	2.68596e+07	2.44881e+07	3.77389e+06	1.56305e+06	1.16893e+07	936022	2.96251e+07	9.37398e+06	2.47799e+07	541776	1.7933e+07	951915	717311	762551	406460	4.22957e+07	4.18509e+07	7.53104e+06	661732	200828	2.05168e+06	3.71412e+07	2.19939e+07	1.9871e+06	1.20934e+06	1.89875e+06	1.66232e+06	1.47237e+06	129818	5.78351e+06	4.40619e+06	205815	1.20518e+06	2.91053e+06	17808.6	1.52994e+07	2.48399e+06	143379	1.82496e+07
CTRL-005	CTRL	19.3213	0	0		0	4.33232e+06	8.50018e+06	259848	1.80195e+06	1.62984e+07	8.40189e+06	2.53092e+06	222995	1.34233e+07	896407	1.74028e+07	3.00153e+06	3.27764e+07	475475	4.11844e+07	2.178e+06	1.37978e+06	1.39884e+06	641823	2.47046e+07	4.06383e+07	7.32453e+06	377952	465427	3.8955e+06	2.81525e+07	2.05038e+07	2.18208e+06	889575	1.07382e+06	1.90558e+06	2.24668e+06	72287.2	7.03136e+06	29335	174191	666631	1.24416e+06	17808.6	1.58461e+07	6.41037e+06	184610	1.39439e+07
CTRL-006	CTRL	20.7451	0	0		0	2.1716e+06	1.87487e+07	1.49757e+06	3.62891e+06	6.69302e+06	1.93101e+07	5.5628e+06	1.42445e+06	3.24084e+07	1.14603e+06	6.73392e+07	5.86224e+06	6.20981e+07	431322	6.18406e+07	1.66313e+06	3.21583e+06	1.00235e+06	547090	2.86671e+07	4.8931e+07	4.88718e+06	924852	171579	2.29477e+06	3.67991e+07	2.53519e+07	2.73126e+06	652071	726989	1.16706e+06	2.28968e+06	317268	6.4159e+06	2.89953e+06	164073	1.27716e+06	1.51945e+06	17808.6	1.84686e+07	3.50459e+06	121439	2.77352e+07
CTRL-007	CTRL	18.5568	0	0		0	18922.2	8.06107e+06	704868	1.67971e+06	2.90215e+07	1.73348e+07	4.26931e+06	845362	1.49555e+07	1.11399e+06	2.13388e+07	1.2426e+07	2.02924e+07	798078	1.92978e+07	1.35973e+06	1.16713e+06	1.95611e+06	369019	3.46603e+07	7.27602e+07	4.22945e+06	725329	173963	1.87012e+06	3.51033e+07	3.27143e+07	2.15661e+06	659572	1.40729e+06	686580	888468	115414	5.099e+06	2.38979e+06	339086	493711	3.28242e+06	17808.6	2.51271e+07	2.155e+06	413687	1.56093e+07
CTRL-008	CTRL	20.2449	0	0		3	1.46443e+06	9.3951e+06	851457	2.12402e+06	3.11977e+07	2.82306e+07	4.66499e+06	834516	1.97371e+07	987096	3.82604e+07	8.17552e+06	1.93008e+07	398631	3.66255e+07	933883	786122	778206	251328	1.45028e+07	3.67379e+07	7.09331e+06	242783	228409	1.68691e+06	1.8825e+07	2.24736e+07	1.26718e+06	517047	914598	754657	803302	213722	5.12729e+06	784048	278931	232902	3.02065e+06	17808.6	3.08207e+07	2.70583e+06	56324.5	2.20508e+07
CTRL-009	CTRL	25.2595	0	0		20	8.01012e+06	1.95998e+07	8842.43	6.73056e+06	2.67654e+07	2.70232e+07	7.39712e+06	721862	1.75842e+07	1.01367e+06	3.50058e+07	6.70647e+06	2.50736e+07	1.00929e+06	4.4089e+07	1.71584e+06	1.05612e+06	1.54476e+06	174064	1.40219e+07	1.87484e+07	6.18688e+06	508125	181255	2.31043e+06	4.8557e+07	2.80745e+07	2.40477e+06	1.0347e+06	1.46577e+06	1.45858e+06	2.05517e+06	136829	7.20295e+06	29335	316658	688794	3.08185e+06	17808.6	1.981e+07	7.90681e+06	677015	2.7945e+07
CTRL-010	CTRL	19.721	0	0		0	3.67393e+06	1.00899e+07	2.2699e+06	2.95983e+06	2.00016e+07	1.8315e+07	3.76195e+06	1.39329e+06	8.28888e+06	681260	3.01511e+07	3.96547e+06	1.86285e+07	813488	3.6147e+07	3.05801e+06	1.82624e+06	877033	794250	2.76434e+07	4.11402e+07	3.82702e+06	518268	313666	3.69036e+06	2.46928e+07	1.66788e+07	3.42627e+06	872673	1.01848e+06	2.39809e+06	3.76805e+06	96555.1	1.13913e+07	5.18226e+06	226265	545375	3.23191e+06	17808.6	4.9629e+07	2.99136e+06	335047	1.21621e+07
CTRL-011	CTRL	23.3234	0	0		0	1.45874e+07	8.41832e+06	726503	2.60649e+06	3.13209e+07	1.63794e+07	3.86305e+06	235698	1.32207e+07	1.61366e+06	9.88423e+06	5.69889e+06	7.50273e+06	839428	1.77074e+07	1.10631e+06	876600	1.85623e+06	303757	2.97043e+07	5.0342e+07	4.08421e+06	670252	82015.5	1.06899e+06	3.43383e+07	2.73586e+07	3.2711e+06	480223	608702	698943	1.68272e+06	76699.8	3.78971e+06	8.11521e+06	137660	712755	1.71923e+06	17808.6	2.41017e+08	9.59664e+06	282878	1.91891e+07
CTRL-012	CTRL	24.4898	0	0		3	18922.2	3.05246e+06	444095	1.08064e+06	1.38401e+07	2.37895e+07	1.21891e+06	126535	6.82106e+06	390049	1.64831e+07	3.48403e+06	5.14683e+06	248994	1.85336e+07	1.30898e+06	945144	871369	510400	1.36433e+07	2.55891e+07	2.9472e+06	776155	299454	1.99082e+06	1.66967e+07	1.42196e+07	1.62441e+06	342813	548878	596913	1.27175e+06	76625.2	5.79616e+06	3.47176e+06	232873	248489	695716	546652	1.44648e+08	1.6406e+06	83429.1	9.72801e+06
CTRL-013	CTRL	20.5714	0	0		0	1.18463e+07	3.19418e+06	444320	1.57819e+06	4.37791e+07	1.30203e+07	3.37406e+06	1.07577e+06	7.64002e+06	546893	2.58442e+07	4.65168e+06	1.28619e+07	198264	2.68302e+07	1.44779e+06	777846	1.11999e+06	329093	1.5299e+07	2.89006e+07	4.90356e+06	592540	115499	1.9423e+06	2.38077e+07	1.99299e+07	3.37059e+06	540310	753238	1.00252e+06	2.19933e+06	92478.1	6.14024e+06	7.15631e+06	230464	1.35732e+06	2.25998e+06	17808.6	1.18208e+08	1.57711e+06	201257	1.18952e+07
CTRL-014	CTRL	21.4476	0	0		0	599651	6.53723e+06	6.64176e+06	2.37466e+06	6.00751e+07	1.86765e+07	3.90712e+06	1.02859e+06	1.03216e+07	802192	2.46782e+07	7.52894e+06	8.06477e+06	246463	1.92713e+07	1.9671e+06	952082	444512	379945	3.30004e+07	4.49031e+07	2.20314e+06	649969	175010	1.2686e+06	3.48822e+07	2.23815e+07	2.32348e+06	660154	1.34941e+06	1.16399e+06	1.61379e+06	108358	5.54315e+06	5.90234e+06	244456	566391	3.78139e+06	17808.6	1.35767e+08	1.89899e+06	385227	9.84865e+06
CTRL-015	CTRL	20.4152	0	0		0	1.22573e+06	6.42304e+06	8842.43	1.9515e+06	1.91871e+07	1.20209e+07	2.65353e+06	977068	8.56131e+06	623212	1.0373e+07	5.18993e+06	1.02643e+07	205768	1.97913e+07	1.35533e+06	993672	1.16128e+06	186789	1.3085e+07	2.25747e+07	5.34345e+06	455568	105230	1.27624e+06	1.91395e+07	1.48869e+07	2.4028e+06	862371	601268	655809	1.57294e+06	81705.6	5.05602e+06	1.62846e+06	145332	697555	1.80753e+06	17808.6	2.45908e+07	3.91881e+06	572141	1.15903e+07
CTRL-016	CTRL		0	0		1	723779	6.34597e+06	8842.43	1.47355e+06	1.7521e+07	5.17297e+06	1.17015e+06	1.35683e+06	9.5434e+06	597883	1.40283e+07	4.31611e+06	1.04769e+07	274776	1.64495e+07	2.86814e+06	533356	968427	651922	2.99618e+07	4.33779e+07	3.69961e+06	761988	126400	2.92203e+06	2.09387e+07	1.57693e+07	2.06181e+06	861646	1.54893e+06	965241	2.47955e+06	175169	9.07068e+06	3.93814e+06	280726	550670	1.60141e+06	17808.6	1.43161e+08	3.20032e+06	210285	6.38847e+06
CTRL-017	CTRL	19.4094	0	0		0	1.14859e+06	2.94368e+06	8842.43	1.16111e+06	4.76061e+06	9.18367e+06	1.68174e+06	357337	4.17779e+06	465701	9.76847e+06	6.20417e+06	7.87634e+06	204444	7.27368e+06	428048	749094	1.99034e+06	549543	1.76167e+07	2.98483e+07	2.02695e+06	766913	552100	3.42101e+06	3.96368e+07	2.85886e+07	2.69961e+06	358967	428480	939328	1.07436e+06	32191.8	4.5747e+06	3.75856e+06	151083	474290	1.23682e+06	17808.6	1.65021e+07	1.47562e+06	3426.24	1.1525e+07
CTRL-018	CTRL	20.2812	0	0		2	681464	1.74065e+07	8842.43	3.9065e+06	6.1139e+07	8.44785e+07	4.80882e+06	411860	1.76235e+07	1.16889e+06	1.12519e+08	8.42114e+06	1.35488e+07	1.52544e+06	2.63173e+07	1.33167e+06	1.27482e+06	1.65803e+06	514877	1.72335e+07	1.68366e+07	6.12091e+06	541385	268244	3.77949e+06	4.16659e+07	3.60744e+07	1.77826e+06	843547	1.85559e+06	2.70104e+06	1.87905e+06	247130	8.71708e+06	1.04543e+06	376272	520476	1.13767e+06	17808.6	1.58904e+07	2.92005e+06	154366	3.39044e+07
CTRL-019	CTRL	22.8774	0	0		0	5.96717e+06	1.24252e+07	8842.43	2.21704e+06	1.7144e+07	2.7958e+07	5.15958e+06	2.20678e+06	1.14923e+07	142763	2.12803e+07	8.01446e+06	1.2177e+07	100264	3.42083e+07	1.34817e+06	489663	4124.41	620683	1.29508e+07	2.05275e+07	4.0374e+06	696588	112747	1.25086e+06	1.17235e+07	7.565e+06	2.07124e+06	980740	299266	542038	485493	83899.4	3.24729e+06	1.05947e+08	51796.2	184111	1.44619e+06	17808.6	6.35966e+07	4.00192e+06	74411.9	1.38862e+07
CTRL-020	CTRL	23.8884	0	0		0	1.30658e+06	1.27246e+07	1.47384e+06	1.50752e+06	5.9164e+07	2.11823e+07	4.81835e+06	833315	1.4812e+07	644951	2.75412e+07	6.45178e+06	1.97843e+07	534123	1.47246e+07	1.58312e+06	757961	1.26218e+06	379036	2.12474e+07	4.43656e+07	6.22649e+06	463696	399117	2.0222e+06	1.95903e+07	1.74635e+07	1.62711e+06	796262	1.39259e+06	827678	1.46031e+06	115910	6.19211e+06	5.14756e+06	428631	965124	1.24785e+06	17808.6	9.88269e+06	4.16119e+06	146138	1.49671e+07
CTRL-021	CTRL	19.9251	0	0		1.5	6.61823e+06	1.25988e+07	2.52481e+06	2.49246e+06	3.23639e+07	5.80886e+07	3.46017e+06	1.76157e+06	1.32714e+07	832926	7.27884e+07	6.61997e+06	1.58102e+07	812633	4.47479e+07	1.19308e+06	1.1081e+06	798238	240806	1.24046e+07	1.90075e+07	2.7612e+06	774864	117820	1.0712e+06	1.94517e+07	1.74626e+07	2.41976e+06	617681	701271	595798	812265	122439	4.73949e+06	2.23385e+06	199626	652194	2.91514e+06	17808.6	1.25581e+07	2.63753e+06	147130	2.0406e+07
CTRL-022	CTRL	19.4094	0	0		0	2.20979e+06	9.56342e+06	5.49046e+06	2.72866e+06	1.08175e+08	3.04038e+07	3.98799e+06	756292	1.43924e+07	617720	9.85959e+07	7.88801e+06	1.21919e+07	1.12402e+06	1.81524e+07	2.09482e+06	1.18874e+06	1.33981e+06	255746	2.1512e+07	2.89665e+07	4.97425e+06	598631	149937	881213	2.73298e+07	2.42575e+07	1.38035e+06	833356	831094	941530	657470	202429	5.07983e+06	29335	357542	502888	1.90719e+06	17808.6	8.31592e+06	3.58579e+06	264069	1.2184e+07
CTRL-023	CTRL	20.6541	0	0		0	391503	8.90387e+06	8842.43	2.38665e+06	2.63368e+07	2.64239e+07	3.73096e+06	755158	1.36249e+07	839323	1.61449e+07	1.01794e+07	1.3635e+07	354950	1.90159e+07	1.75176e+06	1.03968e+06	951310	343991	1.52117e+07	3.70923e+07	4.40995e+06	534356	113094	1.22342e+06	1.9176e+07	2.11996e+07	2.06148e+06	727684	281976	719234	854575	116941	4.44923e+06	1.14309e+06	74063.1	1.06212e+06	2.70526e+06	17808.6	1.6171e+07	2.34457e+06	544555	1.31489e+07
CTRL-024	CTRL	19.0194	0	0		0	1.33033e+06	1.07923e+07	8842.43	4.03706e+06	3.14645e+07	2.77158e+07	5.45109e+06	825029	1.45403e+07	1.03562e+06	2.77674e+07	6.76479e+06	1.88835e+07	709830	2.94925e+07	1.30678e+06	1.76723e+06	723759	223853	1.66503e+07	3.38664e+07	2.63231e+06	551323	141300	1.23045e+06	2.48635e+07	2.32651e+07	1.81498e+06	602240	499962	471790	1.10296e+06	177725	3.88267e+06	2.74272e+06	187062	367972	2.00521e+06	17808.6	1.67094e+07	2.92229e+06	271865	1.61453e+07
CTRL-025	CTRL	22.1526	0	0		0	746825	1.08215e+07	1.79407e+06	2.13756e+06	4.22033e+07	1.88349e+07	4.49384e+06	1.17834e+06	1.20031e+07	851828	3.50697e+07	8.26828e+06	2.37914e+07	624594	4.49896e+07	2.79231e+06	1.72177e+06	229725	278280	1.15071e+07	1.31092e+07	3.90065e+06	623174	129543	1.6266e+06	1.73236e+07	1.62969e+07	2.82422e+06	528089	716621	1.3009e+06	1.6858e+06	66073	6.16287e+06	1.0113e+06	198094	582233	3.53136e+06	1.12493e+06	6.69342e+06	2.6847e+06	195133	1.35148e+07
CTRL-026	CTRL	24.3025	0	0		0	2.75144e+06	1.11456e+07	8842.43	3.48477e+06	1.98064e+07	1.38861e+07	2.56998e+06	100343	1.04541e+07	1.45803e+06	1.3875e+07	9.12025e+06	1.79863e+07	681424	2.65258e+07	1.28141e+06	2.24216e+06	1.35634e+06	414192	3.59119e+07	5.35461e+07	3.06446e+06	649880	173757	1.0369e+06	2.96618e+07	1.96812e+07	1.90259e+06	900638	566154	373043	771802	101682	4.00192e+06	2.04195e+06	155046	918758	2.55866e+06	621210	2.32073e+07	6.08142e+06	102535	1.68125e+07
CTRL-027	CTRL	18.0092	0	0		0	1.18906e+06	1.05896e+07	989603	2.07837e+06	2.13176e+07	1.00833e+07	5.5244e+06	1.40566e+06	8.75046e+06	581482	1.47867e+07	5.44884e+06	1.04308e+07	186147	2.13722e+07	1.4667e+06	802600	951494	294003	7.34355e+06	1.20673e+07	4.59364e+06	603650	101812	2.9129e+06	2.17515e+07	2.22755e+07	1.67182e+06	1.0419e+06	644284	1.25608e+06	2.06709e+06	113991	7.07861e+06	1.86147e+06	185244	309051	1.65688e+06	17808.6	8.13294e+06	2.23597e+06	272436	1.09371e+07
CTRL-028	CTRL		0	0		0	3.19863e+06	1.07103e+07	2.54822e+06	1.82651e+06	4.18817e+07	2.7971e+07	4.79471e+06	622174	8.89458e+06	455504	3.22631e+07	6.35606e+06	6.80066e+06	474019	1.46308e+07	1.50903e+06	887622	648614	337072	1.49245e+07	1.803e+07	3.05367e+06	654477	148891	1.21925e+06	1.89577e+07	1.68041e+07	1.55199e+06	577953	611099	645010	1.27355e+06	129739	4.58915e+06	1.53184e+06	152849	381733	1.24894e+06	17808.6	6.26881e+06	2.08844e+06	3426.24	1.21965e+07
CTRL-029	CTRL	24.3827	0	0		0	2.11945e+06	9.87281e+06	8842.43	1.79979e+06	3.38871e+07	5.1445e+07	3.94244e+06	143469	1.22821e+07	1.00945e+06	3.33163e+07	6.96014e+06	1.23872e+07	834210	3.17257e+07	636699	2.15866e+06	1.58266e+06	213255	1.12649e+07	2.2085e+07	3.70689e+06	374859	137375	850541	2.01911e+07	1.78414e+07	1.37817e+06	527120	551770	353640	470597	99651.3	3.95749e+06	1.11972e+06	133677	522804	1.59614e+06	17808.6	1.65558e+07	3.9929e+06	102125	2.4588e+07
CTRL-030	CTRL	19.708	0	0		0	8.30037e+06	8.49445e+06	8842.43	6.62421e+06	4.06419e+07	5.95935e+07	3.24246e+06	1.01826e+06	4.5937e+06	777200	5.72473e+07	6.75182e+06	1.48334e+07	825517	2.68024e+07	1.37398e+06	1.2444e+06	1.29515e+06	324399	1.53378e+07	2.28868e+07	4.3279e+06	1.06834e+06	283104	3.20153e+06	2.75714e+07	2.28677e+07	4.70381e+06	1.19058e+06	366433	776291	1.64135e+06	28644.3	5.90656e+06	2.17946e+06	112920	398042	1.96509e+06	17808.6	1.12718e+07	2.44556e+06	141214	1.59713e+07
CTRL-031	CTRL	23.1837	0	0		0	1.36035e+06	1.00425e+07	8842.43	3.14759e+06	4.27138e+07	4.44492e+07	3.64758e+06	358550	1.24807e+07	1.17638e+06	3.16366e+07	8.90027e+06	2.54018e+07	1.1927e+06	2.61077e+07	1.20016e+06	973941	2.01607e+06	320614	1.53596e+07	1.96177e+07	4.73451e+06	701998	95001.2	1.72615e+06	1.67059e+07	1.52354e+07	1.35501e+06	417887	459225	711329	1.25366e+06	121503	5.14861e+06	29335	99535.2	536188	2.26308e+06	17808.6	3.49119e+06	5.11488e+06	227659	2.10677e+07
CTRL-032	CTRL	24.6704	0	0		3	2.51408e+06	1.6169e+07	1.03192e+06	2.73979e+06	6.20185e+07	2.87873e+07	4.78984e+06	307384	1.76497e+07	872764	4.30719e+07	9.13856e+06	2.45468e+07	549985	2.28083e+07	1.05046e+06	983032	648875	956931	2.65481e+07	2.23695e+07	4.90955e+06	572533	280259	5.80183e+06	2.49015e+07	1.74918e+07	2.1361e+06	904096	1.8643e+06	1.63306e+06	4.28087e+06	158189	1.00466e+07	1.00221e+06	400445	385307	1.24209e+06	17808.6	3.69915e+06	4.67597e+06	183229	2.32134e+07
CTRL-033	CTRL	33.305	0	0		10	810974	1.98363e+07	1.10071e+06	4.37549e+06	4.04921e+07	2.09929e+07	4.19317e+06	1.2323e+06	1.43882e+07	764396	3.80049e+07	9.23609e+06	2.19947e+07	762359	2.84145e+07	3.11285e+06	3.05533e+06	770173	360304	1.74843e+07	2.7567e+07	2.87059e+06	518877	112788	2.13597e+06	1.91566e+07	1.66916e+07	1.77875e+06	860251	1.29032e+06	819507	1.76852e+06	76805.3	7.57907e+06	1.95496e+06	304378	708032	1.5133e+06	17808.6	1.07442e+07	5.59964e+06	256548	1.16269e+07
CTRL-034	CTRL	18.2531	0	0		2	803464	1.8894e+07	2.26905e+06	3.50537e+06	3.98015e+07	1.56006e+07	7.11171e+06	1.03911e+06	1.89779e+07	1.60531e+06	2.78746e+07	1.13215e+07	9.67028e+06	894687	1.49103e+07	2.15608e+06	792805	423434	297431	1.70262e+07	2.10324e+07	3.74847e+06	469563	186033	1.35376e+06	2.08805e+07	1.60489e+07	1.78479e+06	729554	1.1014e+06	745324	1.06894e+06	264205	5.09407e+06	1.6046e+06	184990	3.96049e+06	2.12549e+06	17808.6	9.27749e+06	3.19281e+06	93429.2	1.88381e+07
CTRL-035	CTRL	28.8942	0	0		0	2.68028e+06	8.75342e+06	8842.43	1.65883e+06	4.53136e+07	2.9589e+07	6.99725e+06	840631	1.12212e+07	556750	4.68151e+07	6.1132e+06	1.22803e+07	848768	2.22208e+07	1.58416e+06	592288	847348	250571	1.01682e+07	2.23732e+07	3.35826e+06	544834	159118	2.54102e+06	1.19306e+07	1.45767e+07	1.91008e+06	492398	665489	767998	2.12357e+06	132002	7.19115e+06	1.68525e+07	186846	304558	1.05165e+06	827070	2.14345e+07	1.33943e+06	121309	1.19634e+07
CTRL-036	CTRL	24.4418	0	0		0	3.43823e+06	1.4098e+07	8842.43	1.30189e+06	5.7194e+07	5.27141e+07	5.13528e+06	689200	9.93962e+06	563890	8.60163e+07	7.16032e+06	1.51109e+07	1.1627e+06	3.07886e+07	1.99205e+06	430125	779742	526225	1.46083e+07	2.00833e+07	5.17914e+06	634937	428837	3.20616e+06	1.96021e+07	1.55953e+07	2.11507e+06	669230	962898	1.3103e+06	2.1114e+06	115137	7.05347e+06	1.34575e+07	150917	426935	1.45757e+06	17808.6	1.35056e+07	2.5769e+06	180985	1.85722e+07
CTRL-037	CTRL	24.3438	0	0		0.03	665465	2.15534e+07	843836	8.94617e+06	4.87188e+07	6.77997e+07	6.64765e+06	414442	2.269e+07	1.83854e+06	6.32582e+07	1.10311e+07	2.87038e+07	1.79206e+06	2.91564e+07	1.62906e+06	1.86762e+06	613954	266178	1.86254e+07	3.00242e+07	2.68543e+06	520429	125164	1.57518e+06	2.59291e+07	2.1282e+07	2.07447e+06	819239	1.53604e+06	1.08609e+06	1.37756e+06	186832	5.504e+06	2.92128e+06	298200	491293	1.89488e+06	17808.6	9.22264e+06	6.5217e+06	327924	3.15271e+07
CTRL-038	CTRL	23.5102	0	0		0	599252	3.14435e+06	696420	649751	9.71475e+06	4.47656e+06	2.658e+06	274079	8.46588e+06	600407	8.58015e+06	6.25866e+06	1.24736e+07	209188	1.55305e+07	612386	446117	4124.41	204548	4.40626e+06	9.43269e+06	1.61052e+06	242771	60143.4	1.00425e+06	6.84766e+06	7.90429e+06	2.07149e+06	272428	237685	457610	723735	130081	4.52949e+06	1.98835e+06	112901	1.31959e+06	2.42154e+06	17808.6	2.09756e+06	2.03432e+06	66582.5	9.22084e+06
CTRL-039	CTRL	23.8884	0	0		0	1.36757e+06	1.76419e+07	8842.43	2.82806e+06	1.5753e+07	3.35312e+07	6.34796e+06	1.02678e+06	2.4716e+07	1.55412e+06	7.70673e+07	7.784e+06	1.05846e+07	623345	3.04206e+07	1.04358e+06	1.92476e+06	4124.41	133972	1.00194e+07	1.34078e+07	1.60448e+06	639546	138527	1.22313e+06	2.07652e+07	1.96151e+07	2.18601e+06	601771	479917	922062	934764	201731	4.81922e+06	2.90478e+06	133658	1.66747e+06	1.92087e+06	17808.6	6.93623e+06	3.44461e+06	277896	2.45176e+07
CTRL-040	CTRL	23.6295	0	0		0	3.43586e+06	1.11572e+07	8842.43	3.42501e+06	1.52834e+07	2.79173e+07	5.88246e+06	1.63503e+06	2.80248e+07	1.13016e+06	4.10093e+07	8.22582e+06	3.15735e+07	473895	4.03853e+07	906810	870950	291326	411977	1.27183e+07	4.17413e+07	2.15268e+06	917674	148155	1.49943e+06	2.24645e+07	2.73128e+07	2.18311e+06	666468	447954	965364	1.21275e+06	208679	4.64249e+06	4.44785e+06	209817	390406	2.94526e+06	17808.6	5.58207e+06	1.93499e+06	186860	1.93631e+07
CTRL-041	CTRL	24.0072	0	0		0	1.7835e+06	1.02201e+07	663306	2.15186e+06	3.32865e+07	4.60466e+07	4.91976e+06	355602	8.87331e+06	851281	2.87113e+07	5.37269e+06	1.40183e+07	755216	2.19924e+07	1.62013e+06	2.65189e+06	659506	302414	1.78552e+07	3.16612e+07	1.9886e+06	310470	184680	2.40721e+06	2.2405e+07	2.02595e+07	1.41156e+06	1.10793e+06	1.03242e+06	1.27891e+06	1.67291e+06	123605	7.80786e+06	2.12064e+06	245049	428469	1.39667e+06	17808.6	6.57285e+06	2.89875e+06	183108	1.5954e+07
CTRL-042	CTRL	21.6049	0	0		0	3.06756e+06	3.00804e+06	8842.43	684855	1.89137e+07	1.29184e+07	3.1105e+06	135464	5.42057e+06	722854	1.33599e+07	6.98312e+06	2.18885e+07	463746	2.82209e+07	1.33941e+06	1.03933e+06	142390	278261	1.77391e+07	2.11647e+07	2.7938e+06	1.02338e+06	99959.6	1.25254e+06	2.04474e+07	1.64786e+07	1.39418e+06	428306	487826	698891	818366	88916.9	4.94138e+06	2.39006e+07	278927	272492	2.66334e+06	17808.6	1.06815e+07	2.63739e+06	177902	1.04689e+07
CTRL-043	CTRL		0	0		0	2.33215e+07	1.1718e+07	8842.43	3.01027e+06	2.65991e+07	4.18736e+07	3.87163e+06	178700	2.00377e+07	610789	2.23058e+07	7.34534e+06	4.19857e+07	594500	2.62282e+07	602301	605047	638650	383815	3.0302e+07	4.12901e+07	1.7299e+06	236678	144151	1.53165e+06	2.22886e+07	1.97463e+07	2.01572e+06	1.5404e+06	394290	333706	1.07827e+06	86987.8	3.66387e+06	4.91293e+06	86866.4	301766	1.39669e+06	1.07587e+06	71523.5	4.72884e+06	481219	2.34514e+07
CTRL-044	CTRL	23.0388	0	0		0	4.316e+06	1.3925e+07	8842.43	3.94195e+06	2.88452e+07	3.39262e+07	6.62865e+06	423954	1.30842e+07	1.14684e+06	3.68573e+07	7.11127e+06	4.93776e+07	1.4873e+06	6.48922e+07	1.17474e+06	1.04525e+06	1.14568e+06	255347	1.39361e+07	2.523e+07	3.67166e+06	420685	123913	1.71764e+06	1.95378e+07	1.94898e+07	1.79703e+06	561892	527130	808760	1.81085e+06	137364	5.3714e+06	29335	131473	1.18215e+06	3.04317e+06	914289	71523.5	6.30567e+06	102286	2.97038e+07
CTRL-045	CTRL	26.2649	0	0		0	3.60615e+06	1.07424e+07	8842.43	3.60601e+06	2.26284e+07	1.00039e+07	3.85623e+06	1.63989e+06	1.59622e+07	845021	2.1752e+07	1.0492e+07	3.79299e+07	411030	3.84671e+07	1.37607e+06	277009	480354	199932	2.18871e+07	3.67598e+07	3.14327e+06	172408	259995	1.51608e+06	2.3008e+07	2.13263e+07	1.23815e+06	518502	443541	591271	752906	147879	4.64043e+06	2.46381e+06	97625.6	805114	1.84217e+06	17808.6	4.46498e+06	1.89115e+06	274029	1.23905e+07
CTRL-046	CTRL	21.2031	0	0		0	1.98958e+06	8.39087e+06	8842.43	1.00596e+06	8.41249e+07	4.27292e+07	2.58883e+06	228440	9.5855e+06	473118	4.71804e+07	7.08021e+06	1.23839e+07	831216	1.82912e+07	2.2112e+06	835981	1.07094e+06	214737	1.31908e+07	2.86711e+07	2.14367e+06	856808	373743	1.64189e+06	1.70243e+07	1.8227e+07	2.31862e+06	1.15643e+06	259559	701809	668205	54762.6	4.3535e+06	6.18353e+06	123435	195504	1.39636e+06	17808.6	3.94214e+06	1.95412e+06	449429	9.44451e+06
CTRL-047	CTRL	25.0762	0	0		0	1.65612e+06	9.81689e+06	2.21542e+06	1.78069e+06	5.03587e+07	4.97976e+07	3.84971e+06	812247	1.16729e+07	697388	6.00453e+07	7.07673e+06	1.97367e+07	574931	3.02767e+07	1.62778e+06	859066	220379	204382	1.4125e+07	1.81832e+07	5.46275e+06	661652	170319	1.10619e+06	1.07154e+07	1.09161e+07	1.29638e+06	648857	546784	581489	837960	120491	5.1271e+06	4.23886e+06	115050	268123	1.44785e+06	17808.6	3.07827e+06	3.03996e+06	267740	2.02365e+07
dilQC-01	Diluted QC						1.82779e+06	5.13309e+06	1.8743e+06	1.04222e+06	1.82377e+07	1.41956e+07	1.73136e+06	471165	6.47773e+06	438560	1.5227e+07	3.71829e+06	9.25613e+06	282354	1.73613e+07	774000	565030	529226	195226	1.0219e+07	1.62622e+07	2.25011e+06	602380	94539.9	818790	1.20978e+07	9.38797e+06	1.43323e+06	289130	330534	401478	750039	86982.2	3.79826e+06	4.18456e+06	72602.7	353534	1.12706e+06	2.19421e+06	1.94798e+07	1.67026e+06	78937.7	8.82476e+06
dilQC-02	Diluted QC						1.62577e+06	5.32718e+06	1.59621e+06	1.05126e+06	1.67655e+07	1.34876e+07	2.1476e+06	439947	6.72968e+06	455159	1.44064e+07	3.9288e+06	8.29471e+06	275285	1.67272e+07	759368	473500	470218	173018	9.25909e+06	1.36656e+07	2.28371e+06	553935	100741	847337	1.09326e+07	8.89486e+06	1.46675e+06	266962	367894	441348	704212	84231	3.75443e+06	3.11878e+06	88404.4	370200	1.13902e+06	2.75932e+06	1.77038e+07	1.63102e+06	90378.8	8.93509e+06
dilQC-03	Diluted QC						1.45399e+06	4.45211e+06	1.59252e+06	778460	1.49652e+07	1.43575e+07	2.79663e+06	471439	6.0037e+06	569186	4.13167e+06	3.71731e+06	8.71577e+06	307483	1.70277e+07	588002	1.00153e+06	528880	30548.4	1.13777e+07	2.61381e+07	3.09842e+06	520907	7502.28	308145	1.45539e+07	1.42438e+07	1.0041e+06	307191	413731	481007	1.34401e+06	2411.71	4.17426e+06	2.83839e+06	55475.8	4.90627e+06	1.5527e+06	1.46995e+06	1.485e+07	2.31099e+06	60022.3	8.79676e+06
poolQC-01	Pooled QC						3.01658e+06	9.29829e+06	2.93264e+06	2.67366e+06	3.24655e+07	2.80117e+07	3.6511e+06	912326	1.37118e+07	730828	3.88855e+07	7.24521e+06	1.76878e+07	455570	2.9582e+07	1.5755e+06	1.24099e+06	1.31701e+06	411155	2.1244e+07	3.25687e+07	4.47812e+06	992724	199767	1.91061e+06	2.57808e+07	1.90457e+07	2.58434e+06	776076	749685	934109	1.20588e+06	111577	5.43028e+06	4.72818e+06	211616	570949	1.96108e+06	5.00983e+06	4.20451e+07	3.41991e+06	250997	1.79234e+07
poolQC-02	Pooled QC						2.93993e+06	9.84357e+06	2.53811e+06	2.55686e+06	3.43676e+07	2.82207e+07	3.87638e+06	991414	1.39166e+07	734229	3.88707e+07	7.27705e+06	1.69746e+07	591669	2.8831e+07	1.5621e+06	1.28024e+06	1.45145e+06	368997	2.062e+07	3.153e+07	4.81477e+06	879160	229968	2.1305e+06	2.51076e+07	1.94588e+07	2.60672e+06	707366	835555	1.05398e+06	1.3453e+06	75345	5.90249e+06	5.08585e+06	224725	753487	2.03353e+06	4.76641e+06	3.89298e+07	3.28446e+06	279354	1.81783e+07
poolQC-03	Pooled QC						3.10806e+06	9.71895e+06	2.5205e+06	2.5811e+06	3.44739e+07	2.83747e+07	3.88761e+06	945764	1.40149e+07	826556	4.40379e+07	7.49961e+06	1.67356e+07	691626	2.86796e+07	1.53264e+06	1.24532e+06	1.07302e+06	349131	1.98908e+07	2.9811e+07	5.01183e+06	894907	214555	2.02782e+06	2.48995e+07	1.93704e+07	2.43747e+06	697706	835846	968486	1.29502e+06	110797	5.73476e+06	4.55626e+06	195831	811859	2.00554e+06	4.91424e+06	3.80151e+07	3.30605e+06	280439	1.83458e+07
poolQC-04	Pooled QC						3.18757e+06	1.15854e+07	2.47272e+06	2.94318e+06	3.83555e+07	2.89003e+07	3.14235e+06	667140	1.52136e+07	1.13329e+06	3.2471e+07	8.77777e+06	1.78816e+07	647477	3.51958e+07	1.56494e+06	1.11881e+06	1.03088e+06	316979	1.99311e+07	3.17505e+07	2.70269e+06	840400	185905	1.59793e+06	2.43539e+07	1.93874e+07	2.2576e+06	556811	758330	833602	1.54827e+06	113936	5.6927e+06	5.57012e+06	223455	864990	2.51873e+06	3.33626e+06	4.23026e+07	4.48446e+06	179996	1.88393e+07
poolQC-05	Pooled QC						3.2049e+06	1.18008e+07	2.57374e+06	2.76223e+06	3.78678e+07	2.83581e+07	3.30169e+06	632783	1.4935e+07	1.21379e+06	2.80294e+07	8.85049e+06	1.80038e+07	682520	3.52889e+07	1.57698e+06	1.09976e+06	805867	308754	2.03369e+07	2.9856e+07	3.01952e+06	864126	195866	1.51485e+06	2.43519e+07	2.0054e+07	2.20356e+06	483078	728798	797401	1.35843e+06	143615	5.37011e+06	5.83944e+06	223359	957194	2.49333e+06	3.35186e+06	4.05541e+07	4.38742e+06	218791	1.86183e+07
poolQC-06	Pooled QC						2.60491e+06	1.14768e+07	2.63317e+06	2.57232e+06	3.61243e+07	2.87521e+07	3.96672e+06	753870	1.37815e+07	1.05149e+06	3.77238e+07	7.47268e+06	1.69735e+07	747926	3.14861e+07	1.6054e+06	1.32017e+06	944324	368824	2.04917e+07	3.08057e+07	4.71304e+06	681738	190552	1.91044e+06	2.49805e+07	2.00907e+07	2.10585e+06	573288	857932	991277	1.52015e+06	191136	5.86206e+06	5.42405e+06	255156	748489	2.28617e+06	4.08195e+06	3.8323e+07	3.85221e+06	127793	1.98187e+07
poolQC-07	Pooled QC						2.57467e+06	1.20501e+07	2.5997e+06	2.84357e+06	3.56988e+07	2.93635e+07	4.34617e+06	807330	1.41164e+07	1.09921e+06	4.36693e+07	7.69471e+06	1.71101e+07	790947	3.2445e+07	1.58909e+06	1.23882e+06	923819	397885	1.99439e+07	3.07571e+07	5.09918e+06	766243	206178	2.18223e+06	2.48228e+07	1.94347e+07	2.11576e+06	610889	923213	1.00971e+06	1.39704e+06	144892	6.22469e+06	5.54837e+06	208870	972144	2.30313e+06	5.30418e+06	3.74431e+07	3.82208e+06	165464	2.04881e+07
poolQC-08	Pooled QC						2.40584e+06	1.13068e+07	2.30629e+06	2.54238e+06	3.51417e+07	2.87114e+07	4.3967e+06	900805	1.33105e+07	1.0591e+06	4.72969e+07	7.21726e+06	1.59461e+07	818670	3.09237e+07	1.55185e+06	1.21969e+06	735330	427955	2.02404e+07	2.71663e+07	5.63767e+06	566142	238261	2.05737e+06	2.38164e+07	1.86208e+07	1.57484e+06	461098	910173	1.03891e+06	1.37779e+06	173038	6.07406e+06	4.861e+06	222225	869381	2.15845e+06	4.20277e+06	3.53686e+07	3.58052e+06	191146	2.01395e+07
poolQC-09	Pooled QC						3.46475e+06	1.00065e+07	2.80356e+06	3.19207e+06	3.53853e+07	2.91667e+07	3.51309e+06	350473	1.27794e+07	1.11356e+06	2.2367e+07	6.58148e+06	1.78359e+07	565165	3.42448e+07	1.73119e+06	1.12985e+06	1.33159e+06	280192	2.25152e+07	3.75054e+07	3.30939e+06	394211	162766	1.40013e+06	2.82536e+07	2.24749e+07	1.78758e+06	615932	685993	776616	1.41976e+06	93843.9	5.14963e+06	5.06704e+06	197395	683203	2.26712e+06	2.50992e+06	4.26228e+07	4.63447e+06	195794	1.91676e+07
poolQC-10	Pooled QC						3.23713e+06	1.02381e+07	2.75167e+06	3.26431e+06	3.81952e+07	2.96334e+07	3.53236e+06	432770	1.30002e+07	1.25167e+06	2.20329e+07	6.4904e+06	1.80467e+07	574307	3.4298e+07	1.63332e+06	1.1252e+06	1.38929e+06	274105	2.22334e+07	3.74491e+07	3.48262e+06	458384	180367	1.47599e+06	2.74739e+07	2.21504e+07	1.62473e+06	644281	716621	852899	1.41356e+06	161447	5.51148e+06	4.94856e+06	216397	823913	2.39384e+06	2.55301e+06	4.14209e+07	4.32642e+06	222927	1.88381e+07
THC-001	THC	25.42	1.02	8.43	OCCAS	1	747545	1.46995e+06	4.16162e+06	614406	8.83845e+06	2.56199e+06	1.20129e+06	914963	6.09421e+06	502384	1.30968e+07	5.95098e+06	9.93286e+06	121942	7.93556e+06	546833	1.40079e+06	542283	196792	9.97695e+06	2.25891e+07	2.68509e+06	817862	247370	1.09319e+06	1.43894e+07	1.42994e+07	2.76773e+06	456982	172288	356989	678866	84625.4	4.15837e+06	2.93958e+06	97170.6	574850	2.01882e+06	3.90561e+06	1.61028e+07	3.14076e+06	233816	9.31121e+06
THC-002	THC	23.5898	6.58	94.21	CHRON	10	1.55372e+06	2.1049e+07	4.83173e+06	2.43355e+06	2.64998e+07	3.532e+07	5.42309e+06	1.39406e+06	3.39161e+07	2.51009e+06	3.34879e+07	1.0592e+07	1.11359e+07	920357	2.33407e+07	1.12312e+06	5.07551e+06	1.21221e+06	604557	2.1052e+07	2.94815e+07	4.85356e+06	880140	301670	2.71433e+06	3.00764e+07	2.15517e+07	1.65115e+06	632923	779311	1.65624e+06	1.45536e+06	375932	7.13404e+06	1.55407e+06	312173	954478	1.48824e+06	9.38134e+06	2.54889e+07	2.21768e+06	92116.1	3.82539e+07
THC-003	THC		2.24	23.67	OCCAS	20	2.27961e+06	4.64126e+06	2.45011e+06	2.30586e+06	5.16212e+06	7.98562e+06	2.5588e+06	600729	1.13018e+07	706839	2.45146e+07	4.77192e+06	1.47279e+07	475847	2.64694e+07	710004	701760	631782	64793.8	2.14392e+06	2.63639e+06	2.12472e+06	522970	132918	1.22761e+06	1.77473e+07	1.5248e+07	2.23052e+06	1.44465e+06	430389	686138	738148	123634	4.65647e+06	8.40891e+06	265903	379504	2.23433e+06	1.04905e+07	2.57337e+07	3.72584e+06	162347	1.63916e+07
THC-004	THC	21.551	2.15	18.79	OCCAS	5	2.95774e+06	5.4418e+06	1.99209e+06	1.4168e+06	1.81354e+07	1.051e+07	2.85026e+06	296765	7.26892e+06	605929	2.35187e+07	4.95256e+06	2.07688e+07	320954	2.87094e+07	871736	823181	1.23238e+06	267698	2.89954e+07	3.51142e+07	2.98862e+06	590542	258042	1.25687e+06	3.31761e+07	2.25587e+07	2.29354e+06	955672	293254	691378	796977	52020.8	4.7673e+06	3.77979e+06	135895	569539	1.47274e+06	5.70485e+06	1.96183e+07	1.99807e+06	174233	1.4678e+07
THC-005	THC	23.2438	0.74	14.5	OCCAS	20	2.52571e+06	1.52696e+07	4.70517e+06	4.10358e+06	1.16331e+07	6.78701e+06	5.63948e+06	916979	2.60091e+07	1.21463e+06	3.51187e+07	9.84319e+06	9.71965e+06	248599	1.35585e+07	1.32545e+06	1.68946e+06	763969	305345	1.55129e+07	3.02369e+07	3.11789e+06	736053	117231	1.22801e+06	2.01887e+07	1.80716e+07	1.78839e+06	381079	886399	636567	836538	293538	5.56046e+06	2.49159e+06	307620	885722	2.95059e+06	5.2219e+06	2.04537e+07	5.18988e+06	119181	1.58201e+07
THC-006	THC	18.7783	0.97	21.68	OCCAS	7	2.3094e+06	1.00842e+07	2.40275e+06	3.38438e+06	2.36395e+07	2.46491e+07	7.04354e+06	269990	1.28968e+07	1.07685e+06	2.64616e+07	5.55989e+06	2.09117e+07	413557	3.28914e+07	911399	1.10859e+06	1.25578e+06	330953	3.83573e+07	4.92559e+07	5.45179e+06	659624	429186	2.4652e+06	4.12086e+07	2.67239e+07	2.26271e+06	860382	1.12577e+06	1.55469e+06	1.89843e+06	143895	7.0483e+06	2.06584e+06	470958	456813	2.32332e+06	4.48494e+06	1.55181e+07	5.57528e+06	625726	2.78823e+07
THC-007	THC	18.726	21.88	112.22	CHRON	5	4.80408e+06	8.41201e+06	1.73382e+07	2.98606e+06	1.23502e+07	1.54815e+07	4.67833e+06	588750	1.84553e+07	1.1646e+06	3.04453e+07	7.18848e+06	2.08731e+07	429698	2.99154e+07	1.04085e+06	700755	1.63147e+06	243518	2.22236e+07	5.20088e+07	7.74897e+06	617586	235212	1.6036e+06	3.11931e+07	3.21604e+07	1.05684e+06	555417	975291	670854	1.08424e+06	190232	4.65309e+06	1.28743e+06	318294	616580	3.07047e+06	1.04469e+07	1.87839e+07	3.07228e+06	359146	1.86869e+07
THC-008	THC	24.2123	2.65	60.02	CHRON	3	3.32014e+06	9.36334e+06	1.91129e+06	2.64228e+06	4.72834e+07	3.13808e+07	4.40233e+06	874686	1.03185e+07	1.14659e+06	4.20791e+07	6.90654e+06	2.67724e+07	801970	2.60921e+07	1.31584e+06	2.08562e+06	2.19894e+06	677487	3.83848e+07	2.99448e+07	7.97312e+06	733175	291040	3.64501e+06	3.18859e+07	2.22347e+07	1.94053e+06	834111	2.07717e+06	2.32578e+06	2.87638e+06	162405	9.94627e+06	2.93446e+06	289405	4.72815e+06	2.14908e+06	9.4773e+06	1.86294e+07	3.95878e+06	345160	2.55321e+07
THC-009	THC	19.8053	1.36	36.04	OCCAS	9	4.04234e+06	1.35224e+07	6.12491e+06	3.76704e+06	6.98064e+07	3.60033e+07	3.77183e+06	1.40673e+06	2.2201e+07	1.17194e+06	4.45272e+07	8.3389e+06	2.45391e+07	635645	2.66959e+07	1.86101e+06	2.28586e+06	1.20997e+06	331896	3.31687e+07	3.44722e+07	3.41333e+06	1.00056e+06	146102	1.43235e+06	3.23933e+07	1.79558e+07	2.33393e+06	1.69733e+06	2.27523e+06	1.10113e+06	1.68074e+06	190585	7.86201e+06	8.23684e+06	860540	1.6788e+06	1.53591e+06	7.80632e+06	2.16228e+07	1.88006e+06	224212	2.26102e+07
THC-010	THC	24.3025	13.52	151.4	CHRON	10	3.12746e+06	1.38661e+07	8.81416e+06	3.82606e+06	3.85765e+07	4.76375e+07	5.56945e+06	291591	9.51411e+06	1.48236e+06	4.72168e+07	8.06778e+06	1.03444e+07	1.25485e+06	2.62334e+07	778827	415848	886952	262592	1.82217e+07	2.24086e+07	7.22846e+06	991855	226856	1.02842e+06	2.04536e+07	1.66658e+07	2.43815e+06	596235	648202	556060	715881	115862	4.19005e+06	1.80304e+06	306639	417059	3.3636e+06	6.18804e+07	1.64601e+07	6.82975e+06	156570	3.80588e+07
THC-011	THC	23.8754	22.74	67.83	CHRON	13	4.35774e+06	6.73251e+06	4.00244e+06	1.8731e+06	2.31051e+07	1.74073e+07	1.66766e+06	279967	1.03682e+07	727419	2.38057e+07	8.01725e+06	1.87368e+07	811014	2.36385e+07	1.77979e+06	876030	792162	438667	1.80711e+07	3.86086e+07	5.11223e+06	821204	470254	2.10896e+06	2.21191e+07	1.73352e+07	2.63907e+06	383668	298133	907769	1.02991e+06	111534	5.2304e+06	3.61665e+06	92818.3	892821	3.32696e+06	1.61506e+07	1.0675e+08	5.13664e+06	518666	1.58926e+07
THC-012	THC	17.9012	1.53	31.23	OCCAS	4	1.25741e+06	7.44355e+06	2.74418e+07	9.33727e+06	1.64311e+07	9.23963e+06	2.23789e+06	595864	1.04629e+07	1.43123e+06	1.97514e+07	6.00281e+06	7.42881e+06	417712	1.90686e+07	966711	1.82993e+06	1.15935e+06	551701	1.78555e+07	2.84446e+07	3.50898e+06	783312	261666	2.21536e+06	2.60408e+07	1.69723e+07	2.54392e+06	797825	741887	1.1074e+06	1.54427e+06	107453	6.01628e+06	3.63327e+06	263227	596310	1.58106e+06	6.11042e+06	1.01672e+08	7.39875e+06	111703	1.44791e+07
THC-013	THC	21.8776	0.43	10.92	OCCAS	5	18922.2	1.09576e+07	1.02745e+06	3.21558e+06	3.22519e+07	2.6229e+07	4.08072e+06	765452	2.19173e+07	1.23644e+06	4.60738e+07	9.04759e+06	1.42531e+07	1.13359e+06	4.47551e+07	1.08144e+06	715873	1.50114e+06	320680	7.92512e+06	1.87082e+07	6.81884e+06	651587	222075	4.233e+06	1.67181e+07	2.00492e+07	2.47857e+06	446149	1.24804e+06	1.35303e+06	2.18866e+06	179775	8.17148e+06	6.10176e+06	369521	756382	4.27952e+06	3.96462e+06	2.01973e+08	3.1142e+06	120636	2.81733e+07
THC-014	THC	22.6422	1.38	20.81	OCCAS	20	4.56324e+06	1.32016e+07	2.95071e+06	3.73817e+06	9.28765e+07	8.08798e+07	4.4702e+06	453497	1.21451e+07	968637	8.07884e+07	8.8506e+06	1.1471e+07	1.00339e+06	5.55183e+07	2.07241e+06	1.582e+06	1.78823e+06	154445	3.16726e+07	3.35827e+07	1.85566e+06	910115	122107	553883	2.92189e+07	1.88054e+07	2.38491e+06	1.14973e+06	1.10187e+06	585945	1.07498e+06	133471	4.97145e+06	3.43628e+06	447709	1.84178e+06	3.77541e+06	1.78944e+06	2.45231e+08	4.36412e+06	223771	2.42364e+07
THC-015	THC	27.7575	6.48	91.32	CHRON	20	1.15387e+06	5.93531e+06	2.71557e+06	2.67487e+06	5.41454e+07	1.35994e+07	2.41831e+06	115670	1.23603e+07	539090	2.21152e+07	3.99431e+06	7.25208e+06	399269	4.50885e+07	7.27408e+06	630975	1.01088e+06	992838	8.91377e+07	7.22995e+07	3.40782e+06	594800	426423	4.18758e+06	1.07843e+08	5.40063e+07	1.6199e+06	976985	696858	1.64337e+06	2.98041e+06	204695	6.45933e+06	8.68081e+06	157020	311596	1.70177e+06	5.5224e+07	2.80022e+08	1.54244e+07	1.53126e+06	1.2017e+07
THC-016	THC		2.3	9.74	OCCAS	15	7.62158e+06	2.29277e+07	973192	7.24316e+06	8.1225e+07	6.19019e+07	7.46083e+06	291429	3.02837e+07	2.01377e+06	1.07894e+08	1.09694e+07	3.99053e+07	3.85367e+06	5.96505e+07	1.99009e+06	881556	1.88712e+06	343365	2.35618e+07	3.26425e+07	9.54533e+06	836554	192431	1.92574e+06	2.44415e+07	2.49247e+07	1.5547e+06	759409	1.73638e+06	1.14924e+06	1.64191e+06	216671	6.96843e+06	29335	499242	1.0117e+06	2.6107e+06	2.40041e+06	4.25809e+07	4.1252e+06	231295	4.08969e+07
THC-017	THC	21.048	8.94	110.11	CHRON	10	3.10115e+06	1.07434e+07	9.8016e+06	4.72626e+06	6.04401e+07	2.01304e+07	5.88434e+06	340614	1.79633e+07	1.2781e+06	2.51088e+07	8.70286e+06	4.08559e+07	1.1117e+06	6.00073e+07	1.73193e+06	1.24364e+06	864444	238527	2.52226e+07	5.26916e+07	1.11867e+07	1.31154e+06	96840.9	1.24046e+06	3.36928e+07	2.63258e+07	2.75782e+06	466144	222727	889617	1.70101e+06	136586	4.51003e+06	5.71539e+06	149946	1.20777e+06	3.18638e+06	4.27119e+07	2.15632e+07	6.04142e+06	409179	2.86959e+07
THC-018	THC	22.3403	3.06	15.47	OCCAS	10	1.78649e+06	3.31433e+06	8842.43	2.02012e+06	1.01095e+07	6.66184e+06	1.63588e+06	1.29857e+06	1.72418e+07	646977	2.28712e+07	9.70051e+06	1.43034e+07	280885	2.22612e+07	684427	457904	676703	223793	5.98789e+06	2.08979e+07	4.41015e+06	731771	92254.7	1.29204e+06	1.09968e+07	1.41864e+07	2.2833e+06	218974	337485	418585	572202	263128	4.6997e+06	2.4913e+06	92904.7	394654	2.58486e+06	2.83568e+06	2.55548e+07	1.41009e+06	113685	1.36778e+07
THC-019	THC		0.91	10.3	OCCAS	3	3.36653e+06	7.94578e+06	439287	1.5354e+06	1.41881e+07	7.75031e+06	2.77313e+06	201398	1.19136e+07	1.33558e+06	1.75903e+07	8.38256e+06	2.37166e+07	629581	2.71096e+07	1.12817e+06	1.30749e+06	1.06443e+06	466135	2.91796e+07	5.5048e+07	6.32332e+06	763669	307279	1.76295e+06	2.90115e+07	2.23668e+07	1.74429e+06	369531	940397	803314	1.53614e+06	155048	5.00488e+06	1.78816e+06	263713	1.38438e+06	3.12974e+06	2.58557e+06	3.73392e+07	5.76469e+06	80680.1	1.82199e+07
THC-020	THC		0.27	11.96	OCCAS	10	5.21286e+06	3.03543e+07	1.99252e+06	1.29098e+07	1.71148e+07	1.73001e+07	2.1269e+06	674959	5.71498e+07	2.70435e+06	1.78166e+07	9.19816e+06	1.27529e+07	696658	3.29157e+07	1.92056e+06	813178	976127	280009	1.96265e+07	3.65476e+07	3.51643e+06	1.099e+06	159701	2.54178e+06	2.59414e+07	1.98788e+07	3.59279e+06	763465	779210	968715	2.56506e+06	405935	6.25278e+06	7.93248e+06	151055	1.61612e+06	2.99817e+06	1.50283e+06	3.15606e+08	1.08793e+07	594568	2.86442e+07
THC-021	THC		0.69	16.02	OCCAS	0	1.59154e+06	1.2067e+07	602091	3.08342e+06	2.4513e+07	1.06487e+07	3.59472e+06	677051	2.30052e+07	1.53073e+06	3.34238e+07	7.21823e+06	4.8145e+07	631436	6.75137e+07	2.22796e+06	1.63479e+06	1.25874e+06	536701	3.88093e+07	7.32673e+07	1.24841e+07	534822	412671	2.33002e+06	3.40191e+07	2.95669e+07	1.65879e+06	659508	746623	1.67482e+06	1.93022e+06	213741	5.80191e+06	518240	165776	635739	2.46933e+06	1.36952e+06	3.96517e+07	3.52366e+06	419587	2.12459e+07
THC-022	THC	23.6713	1.4	9.67	OCCAS	2.5	2.32566e+06	2.81479e+06	1.52286e+06	3.13076e+06	8.27909e+06	6.90648e+06	1.37485e+06	279341	6.29405e+06	713121	9.25673e+06	5.55909e+06	1.57343e+07	262149	1.00234e+07	710733	1.19365e+06	418605	473049	1.1224e+07	2.05778e+07	2.48658e+06	800273	621409	3.23879e+06	2.59502e+07	1.87987e+07	2.17878e+06	295085	549674	580513	1.25853e+06	205360	6.08659e+06	5.51864e+06	149316	447483	2.20205e+06	1.36552e+06	4.58201e+06	5.26114e+06	76806.4	1.12284e+07
THC-023	THC		21.08	107.78	CHRON	20	1.76755e+06	1.18958e+07	7.9011e+06	1.98285e+06	5.09758e+07	9.53134e+07	3.93083e+06	252286	1.2953e+07	1.67525e+06	8.44494e+07	8.63056e+06	1.85559e+07	2.99197e+06	3.79755e+07	1.05471e+06	1.32195e+06	885294	257361	1.94439e+07	2.80899e+07	7.47359e+06	536923	292205	1.11785e+06	1.86518e+07	1.8101e+07	1.99754e+06	717039	794846	845875	865305	133448	5.33502e+06	2.4991e+06	344582	1.39028e+06	2.04036e+06	2.80308e+07	3.13075e+07	5.80945e+06	106092	3.78287e+07
THC-024	THC	25.464	0.98	13.4	OCCAS	10	1.43006e+06	6.37403e+06	8842.43	1.77329e+06	2.20738e+07	2.41389e+07	4.66742e+06	546155	1.29911e+07	764947	3.55157e+07	5.06775e+06	2.68397e+07	314713	4.8698e+07	748198	1.98893e+06	1.08984e+06	606680	1.33207e+07	3.8094e+07	3.00218e+06	677811	167010	2.42001e+06	1.7121e+07	1.95665e+07	2.57421e+06	471936	980874	1.26093e+06	2.44183e+06	698300	8.45174e+06	3.04083e+06	252646	226558	1.63456e+06	3.13699e+06	2.2994e+06	4.95012e+06	121001	1.59632e+07
THC-025	THC	24.2786	1.34	8.57	OCCAS	20	735348	1.12449e+07	1.30058e+07	2.65363e+06	3.45073e+07	3.1225e+07	4.36196e+06	1.27904e+06	1.30431e+07	575254	6.03884e+07	8.98813e+06	1.93449e+07	609241	3.73898e+07	999545	779233	1.27345e+06	210907	1.19362e+07	2.14949e+07	4.84273e+06	899508	121056	1.25861e+06	1.3499e+07	1.30222e+07	2.3966e+06	577678	222036	629153	1.13189e+06	142914	4.86296e+06	2.34035e+06	99162.7	672312	1.9258e+06	1.96229e+06	8.7001e+06	5.43029e+06	97311.7	2.1267e+07
THC-026	THC	19.5963	0.65	8.67	OCCAS	20	3.27819e+06	6.11707e+06	8842.43	556390	4.90291e+07	3.70113e+07	2.94904e+06	287702	9.48985e+06	524004	3.62424e+07	6.72933e+06	5.88474e+06	479401	1.65555e+07	1.32221e+06	976692	1.89452e+06	314665	5.83834e+06	1.07295e+07	2.25835e+06	825965	89166.5	1.43941e+06	1.16684e+07	1.2696e+07	2.69634e+06	699436	495906	837918	1.31256e+06	195375	5.83072e+06	29335	309352	310454	1.57397e+06	345139	1.38246e+07	948250	68097.1	1.05422e+07
THC-027	THC	22.0384	2.34	26.15	OCCAS	20	2.11651e+06	1.00712e+07	4.61396e+06	1.70356e+06	2.04861e+07	2.22785e+07	3.98978e+06	737129	7.37999e+06	648065	3.10838e+07	4.2953e+06	1.29845e+07	1.16481e+06	3.16201e+07	1.21159e+06	980375	948397	185380	1.21947e+07	1.87195e+07	5.54538e+06	324304	137916	900805	1.48992e+07	1.16686e+07	1.55405e+06	748941	336691	420339	582177	108467	4.11278e+06	29335	117660	488452	1.66899e+06	1.72636e+06	1.04269e+07	3.66716e+06	168712	1.54495e+07
THC-028	THC		7.63	101.36	CHRON	15	2.20273e+06	1.29257e+07	6.59326e+06	1.85184e+06	5.89641e+07	5.98173e+07	5.56201e+06	642612	1.39175e+07	2.62582e+06	6.22433e+07	1.17437e+07	3.2989e+07	1.65279e+06	4.28427e+07	1.18594e+06	6.09087e+06	1.79222e+06	651331	2.35335e+07	4.10051e+07	8.98226e+06	312469	146619	1.8584e+06	2.57738e+07	2.13005e+07	2.52163e+06	474373	655592	1.83473e+06	1.38275e+06	100427	5.97006e+06	1.35105e+06	202710	788513	2.40968e+06	1.49895e+07	1.14999e+07	2.38411e+06	144979	3.64643e+07
THC-029	THC	17.0993	1.45	4.71	OCCAS	9	2.47358e+06	1.02842e+07	448946	2.11783e+06	3.53752e+07	2.18689e+07	4.46322e+06	161282	9.78373e+06	1.53809e+06	3.2605e+07	9.81304e+06	9.87595e+06	993552	2.78575e+07	1.42734e+06	461655	1.13428e+06	251928	1.82415e+07	2.63263e+07	3.81354e+06	419220	275948	1.20961e+06	2.12801e+07	1.86265e+07	2.03339e+06	858710	419431	801779	1.1556e+06	76239.4	4.9903e+06	1.08631e+06	166959	446398	4.07589e+06	1.53497e+06	1.08314e+07	3.0038e+06	188460	2.00131e+07
THC-030	THC	21.7365	4	53.36	CHRON	2	2.73022e+06	7.62534e+06	1.06898e+06	903949	2.4299e+07	1.11374e+07	4.16417e+06	751898	5.8555e+06	1.07281e+06	2.08862e+07	9.20807e+06	1.18998e+07	1.60532e+06	1.74579e+07	2.48171e+06	651266	1.56957e+06	327795	2.24912e+07	3.38211e+07	3.34101e+06	953809	249851	1.49174e+06	2.46121e+07	1.98014e+07	2.46494e+06	355207	959576	577370	1.41021e+06	73169.5	5.41304e+06	1.61468e+06	524379	2.85204e+06	2.12862e+06	1.47492e+07	1.76637e+07	2.75456e+06	43061.4	1.14258e+07
THC-031	THC	21.3839	8.83	45.92	CHRON	5	3.41988e+06	2.10459e+07	5.79679e+06	3.59267e+06	8.86986e+07	9.44945e+07	6.46579e+06	1.61632e+06	1.25679e+07	1.7385e+06	1.16097e+08	1.20819e+07	2.14583e+07	1.3021e+06	2.94886e+07	1.66266e+06	1.44841e+06	291814	420074	2.30047e+07	1.77648e+07	1.02329e+07	750661	156489	1.50635e+06	2.3602e+07	1.97385e+07	1.98268e+06	884296	1.97866e+06	1.6009e+06	1.45412e+06	181306	7.21889e+06	29335	415746	1.02633e+06	2.67622e+06	1.11593e+07	7.66121e+06	2.73358e+06	161555	3.3944e+07
THC-032	THC	26.6749	1.53	16.02	OCCAS	10	4.63123e+06	3.44462e+06	824464	2.30626e+06	7.60638e+06	8.27051e+06	2.60697e+06	860437	6.81666e+06	779943	1.01843e+07	4.87979e+06	1.78237e+07	306222	2.28357e+07	1.02565e+06	1.10619e+06	1.00179e+06	392005	1.62117e+07	3.28661e+07	2.84884e+06	860240	138520	2.5877e+06	2.25079e+07	2.03579e+07	2.0079e+06	282467	613725	817081	1.58285e+06	2411.71	5.99447e+06	2.61035e+07	236639	532168	3.32088e+06	1.80451e+06	2.31144e+07	4.22872e+06	176714	1.1704e+07
THC-033	THC	21.9679	3.63	19.63	OCCAS	10	3.85293e+06	1.00176e+07	2.21932e+06	1.81676e+06	4.84908e+07	5.3118e+07	4.69647e+06	347684	7.93841e+06	861252	4.93562e+07	8.15051e+06	1.70641e+07	1.46353e+06	4.66766e+07	2.25085e+06	1.15885e+06	473170	223821	1.02145e+07	7.77037e+06	5.76928e+06	613708	148924	1.9319e+06	1.84708e+07	1.74279e+07	3.04794e+06	762177	673696	1.46614e+06	1.67761e+06	133143	6.36175e+06	1.94717e+07	114337	685032	3.41252e+06	6.07513e+06	2.22202e+07	3.92492e+06	157494	2.30291e+07
THC-034	THC	23.0954	1.12	13.55	OCCAS	6	1.40351e+06	1.04279e+07	547332	3.32672e+06	3.46098e+07	2.70803e+07	6.21134e+06	312649	1.48264e+07	1.06692e+06	2.26978e+07	7.88165e+06	3.1318e+07	932911	4.62156e+07	1.18667e+06	911361	675503	236368	2.70518e+07	5.02398e+07	8.70237e+06	630574	332308	1.56032e+06	2.94352e+07	2.56927e+07	1.93078e+06	847200	392374	1.02878e+06	1.46178e+06	130055	4.94699e+06	1.07454e+06	142146	918969	2.30927e+06	2.9719e+06	5.6984e+06	4.18953e+06	274017	2.56763e+07
THC-035	THC	23.1206	1.54	33.64	OCCAS	10	1.61245e+06	7.73462e+06	1.14246e+07	1.82092e+06	4.96193e+07	4.67669e+07	6.81581e+06	646459	9.35039e+06	489952	2.43768e+07	1.01783e+07	2.36051e+07	548496	3.15746e+07	1.86514e+06	195082	1.28298e+06	197549	1.82883e+07	2.8557e+07	2.99121e+06	825034	184421	1.21261e+06	2.10806e+07	1.85894e+07	2.70193e+06	370062	533838	456560	726961	81929.6	4.05613e+06	5.30866e+07	184376	323783	2.20694e+06	3.60366e+06	3.84972e+07	2.0694e+06	611196	1.61414e+07
THC-036	THC	22.8433	8.78	41.17	CHRON	0	1.56541e+06	1.83112e+07	5.66206e+06	3.40993e+06	3.21093e+07	3.01274e+07	6.26682e+06	244012	1.13505e+07	1.4673e+06	3.75218e+07	9.81709e+06	2.78802e+07	2.00745e+06	3.75375e+07	1.22516e+06	891067	728458	114137	1.61115e+07	1.62579e+07	3.41278e+06	322328	92870.7	669216	1.99079e+07	1.56701e+07	2.58316e+06	526489	760692	387036	589332	99468.5	4.24798e+06	1.27723e+07	315714	988889	2.97848e+06	9.18042e+06	4.8062e+06	3.04195e+06	62807.7	3.3705e+07
THC-037	THC	29.1502	1.26	24.04	OCCAS	10	3.267e+06	8.52647e+06	824130	2.70522e+06	1.869e+07	1.14742e+07	4.54754e+06	1.13584e+06	6.89109e+06	614617	2.02175e+07	4.57488e+06	3.83909e+07	371232	4.8241e+07	3.07545e+06	706569	419389	406190	2.95685e+07	3.50448e+07	6.80718e+06	605127	118176	1.47701e+06	2.9755e+07	1.48276e+07	1.4122e+06	570925	1.81954e+06	905019	1.91132e+06	68408.4	6.57449e+06	2.45109e+06	250787	769283	1.95916e+06	4.45548e+06	1.03455e+06	2.96145e+06	163948	1.3e+07
THC-038	THC	19.3314	0.42	8.28	OCCAS	10	4.89474e+06	6.00723e+06	695515	1.63172e+06	2.37302e+07	4.02744e+07	3.65314e+06	447796	7.64486e+06	820354	2.51966e+07	7.72479e+06	1.91677e+07	777437	3.04762e+07	633125	1.10833e+06	4124.41	233689	1.44525e+07	1.77464e+07	2.6225e+06	625694	83948.3	923547	1.71996e+07	1.64439e+07	2.06877e+06	719607	461428	386512	765308	82182.7	3.7927e+06	2.48418e+06	105597	798975	2.38701e+06	2.05266e+06	3.01448e+06	1.3108e+06	50787.3	1.96132e+07
THC-039	THC		1.36	28.66	OCCAS	0.5	1.79808e+06	3.17371e+06	1.33168e+06	1.13526e+06	8.99281e+06	1.64428e+07	1.67589e+06	318755	5.25664e+06	719241	1.51751e+07	5.14903e+06	3.79757e+07	579202	4.37302e+07	649191	1.19671e+06	1.12332e+06	137829	1.41351e+07	2.38715e+07	4.709e+06	660136	56122.9	771486	2.04163e+07	1.90467e+07	1.66093e+06	244304	366826	375030	702149	52914	3.36349e+06	5.61967e+06	166204	807065	1.83964e+06	5.2842e+06	1.59786e+06	4.78925e+06	127812	1.55969e+07
THC-040	THC	20.9712	2.75	46.31	CHRON	10	5.53474e+06	5.69506e+06	1.0124e+06	940229	2.24356e+07	1.20488e+07	3.75761e+06	161445	6.85709e+06	848796	1.77573e+07	6.17052e+06	1.78647e+07	486247	3.03958e+07	994042	1.28266e+06	973929	291881	1.94418e+07	1.51248e+07	5.43677e+06	654465	341880	1.58412e+06	2.78591e+07	1.54909e+07	2.36512e+06	558345	610084	572194	853168	79054	5.87039e+06	4.28061e+07	176976	1.4641e+06	2.10396e+06	7.0862e+06	2.73985e+07	2.31727e+06	3426.24	1.72007e+07
THC-041	THC	27.102	1.18	15.34	OCCAS	5.5	5.90091e+06	8.18211e+06	8842.43	2.26973e+06	4.1653e+07	3.37982e+07	3.86674e+06	1.15539e+06	1.25807e+07	551040	3.61995e+07	4.84413e+06	2.14145e+07	490707	3.60809e+07	1.67848e+06	521563	122527	458292	1.60019e+07	3.49331e+07	8.62452e+06	939978	166565	2.91224e+06	1.53675e+07	1.41353e+07	2.49703e+06	445579	829304	799515	1.7277e+06	115567	6.96679e+06	1.62552e+07	191050	602938	1.30901e+06	1.49938e+06	2.38813e+06	1.2343e+06	245086	1.2416e+07
THC-042	THC	26.8274	12.54	86.92	CHRON	15	3.02986e+06	1.25623e+07	1.76382e+07	1.93686e+06	1.43808e+07	7.73888e+06	4.49411e+06	309910	1.11367e+07	1.31554e+06	1.69495e+07	9.58936e+06	3.05058e+07	1.0021e+06	5.20985e+07	1.75702e+06	469435	334067	323398	1.58379e+07	1.80308e+07	5.17428e+06	348256	298034	1.09743e+06	1.96557e+07	1.41027e+07	1.84637e+06	639955	470198	868934	1.39312e+06	242165	4.15345e+06	7.45936e+06	139036	2.4038e+06	3.32206e+06	1.56717e+07	9.2695e+06	4.7392e+06	95051.7	1.78557e+07
THC-043	THC	22.3954	3.34	38.22	OCCAS	8	6.46178e+06	1.03504e+07	2.91623e+06	1.69151e+06	1.0083e+08	9.13578e+07	3.89668e+06	75260.2	1.05978e+07	1.42246e+06	8.80058e+07	1.51293e+07	1.96363e+07	903240	3.92287e+07	1.87142e+06	370038	974273	312764	7.32923e+07	8.07342e+07	2.62493e+06	828296	113446	606249	5.01129e+07	3.15956e+07	2.37509e+06	748623	1.71407e+06	671612	502573	60644.6	4.20077e+06	1.44671e+07	346099	333902	2.3528e+06	7.77659e+06	1.43244e+07	3.31299e+06	296469	2.90706e+07
THC-044	THC	21.7365	0.8	6.99	OCCAS	12	2.2436e+06	4.85189e+06	2.22617e+06	2.02722e+06	1.4758e+07	9.42289e+06	2.31374e+06	1.13074e+06	5.33215e+06	639315	2.04153e+07	4.30329e+06	1.75344e+07	187123	2.23925e+07	1.14988e+06	1.52426e+06	662897	350051	1.85904e+07	2.72487e+07	3.76667e+06	461925	248980	1.98165e+06	2.45484e+07	1.55792e+07	1.93438e+06	823122	1.10239e+06	1.08313e+06	1.52468e+06	46253.6	7.27793e+06	6.46287e+06	144314	691888	1.9224e+06	2.16519e+06	6.07007e+06	1.64471e+06	171699	1.19182e+07
THC-045	THC	24.3026	0.76	10.15	OCCAS	0	2.57878e+06	1.05752e+07	8842.43	3.51211e+06	1.51764e+07	1.1346e+07	4.15977e+06	693946	1.05947e+07	1.07731e+06	2.67149e+07	6.21175e+06	1.14852e+07	818111	1.20005e+07	2.53034e+06	1.39496e+06	1.45372e+06	516941	2.35404e+07	2.51664e+07	7.24013e+06	905671	163789	3.25561e+06	2.67546e+07	1.85277e+07	2.96315e+06	671345	994481	1.11557e+06	2.04971e+06	108715	7.53135e+06	4.90956e+06	138068	1.16823e+06	1.08667e+06	3.60365e+06	4.53558e+06	7.75171e+06	365408	1.60892e+07
THC-046	THC	20.3037	1.41	15.43	OCCAS	0	1.13394e+06	1.23159e+07	1.24347e+07	2.17159e+06	8.11329e+07	6.8967e+07	3.58891e+06	1.27351e+06	1.06835e+07	730232	1.63614e+08	1.04455e+07	4.10224e+07	1.1597e+06	6.03964e+07	1.46714e+06	674141	4124.41	372488	2.36772e+07	2.24745e+07	5.02201e+06	424368	317271	1.64364e+06	2.51355e+07	2.33042e+07	2.41471e+06	756815	1.24938e+06	1.00608e+06	844091	86095.2	5.42152e+06	2.07791e+06	121561	580863	2.07183e+06	5.14361e+06	3.75427e+06	1.19612e+06	91706.6	2.42491e+07
THC-047	THC	21.2228	1.7	33.59	OCCAS	0	685532	9.89545e+06	4.76724e+06	1.50279e+06	4.28546e+07	3.14306e+07	3.39231e+06	208553	8.24251e+06	1.00862e+06	4.40523e+07	1.14515e+07	1.69708e+07	511458	2.47428e+07	1.33598e+06	1.56186e+06	775846	224240	2.0783e+07	3.07084e+07	3.2892e+06	371234	87110.3	985163	2.29182e+07	1.74308e+07	1.38905e+06	692928	656413	519888	551289	152245	4.39107e+06	1.85526e+06	112238	575291	2.23359e+06	6.91681e+06	3.40871e+06	3.09667e+06	53742.9	1.62228e+07
thcQC-01	THC-QC						2.84548e+06	8.37927e+06	4.56591e+06	2.53967e+06	3.07604e+07	2.7682e+07	3.92379e+06	824879	1.1843e+07	931776	3.87077e+07	6.55163e+06	1.91797e+07	606254	3.15654e+07	1.56706e+06	1.39794e+06	947106	379225	2.37395e+07	3.42703e+07	4.42125e+06	753750	237284	1.97239e+06	2.67189e+07	1.94393e+07	2.38329e+06	514370	869834	973151	1.18921e+06	131915	6.00169e+06	6.7135e+06	243803	824689	2.04685e+06	9.42509e+06	4.84443e+07	3.80979e+06	178209	1.96019e+07
thcQC-02	THC-QC						2.53874e+06	9.3413e+06	4.08253e+06	2.55804e+06	3.48815e+07	2.99981e+07	4.28265e+06	773115	1.3432e+07	1.25846e+06	4.29913e+07	6.81295e+06	1.69457e+07	923161	3.33067e+07	1.64752e+06	1.30774e+06	796693	409040	2.26122e+07	2.6773e+07	5.93922e+06	815667	266613	1.98646e+06	2.57598e+07	2.01227e+07	2.08268e+06	588141	908330	1.03689e+06	1.41739e+06	180812	5.66503e+06	5.11068e+06	216363	990364	2.46842e+06	7.27171e+06	4.25304e+07	3.80848e+06	169205	2.15079e+07
thcQC-03	THC-QC						2.62728e+06	9.03375e+06	4.26437e+06	2.51287e+06	3.27571e+07	3.01283e+07	4.76848e+06	497878	1.17486e+07	1.1883e+06	2.56549e+07	6.42411e+06	1.67583e+07	650176	3.36121e+07	1.67828e+06	1.38692e+06	1.17111e+06	334316	2.24841e+07	3.52156e+07	6.96869e+06	518607	227494	1.83155e+06	2.81573e+07	2.23194e+07	1.42675e+06	540970	851709	1.01448e+06	1.53144e+06	139867	5.6931e+06	4.17375e+06	241534	868903	2.3195e+06	5.55754e+06	4.44268e+07	3.9269e+06	288782	2.17399e+07
[truncated: 27 more columns]
