# Supplementary material for: Cannabis consumption is associated with altered steroid metabolism in young men
Source: Commun Med (Lond). 2026 Apr 16;6:224. doi: 10.1038/s43856-026-01469-x (PMC13087242; doi:10.1038/s43856-026-01469-x)
Supplement: Supplementary file 9 — Supplementary Data 6 [file 43856_2026_1469_MOESM9_ESM.xlsx]

## Sheet: SourceData-Fig1
Sample		Androstenedione	Testosterone	5α-Dihydrotestosterone
		C (nmol/L)	C (nmol/L)	Normalized peak area
CTRL-001	CTRL	2.18815	21.8171	2.47867e+06
CTRL-002	CTRL	3.37158	21.9724	2.74221e+06
CTRL-003	CTRL	1.98496	23.6962	2.68726e+06
CTRL-004	CTRL	3.20767	21.054	2.91053e+06
CTRL-005	CTRL	2.45088	9.25647	1.24416e+06
CTRL-006	CTRL	4.87494	10.2922	1.51945e+06
CTRL-007	CTRL	2.7436	28.9067	3.28242e+06
CTRL-008	CTRL	3.87581	23.6452	3.02065e+06
CTRL-009	CTRL	4.91182	19.4381	3.08185e+06
CTRL-010	CTRL	2.1377	19.0605	3.23191e+06
CTRL-011	CTRL	3.37281	19.1291	1.71923e+06
CTRL-012	CTRL	1.70987	13.2493	695716
CTRL-013	CTRL	2.09078	20.2328	2.25998e+06
CTRL-014	CTRL	1.73107	21.0458	3.78139e+06
CTRL-015	CTRL	2.0372	14.1801	1.80753e+06
CTRL-016	CTRL	1.12289	12.994	1.60141e+06
CTRL-017	CTRL	2.02572	11.5106	1.23682e+06
CTRL-018	CTRL	5.95929	7.68697	1.13767e+06
CTRL-019	CTRL	2.44073	17.7224	1.44619e+06
CTRL-020	CTRL	2.63072	8.62108	1.24785e+06
CTRL-021	CTRL	3.5867	19.5494	2.91514e+06
CTRL-022	CTRL	2.14154	6.6349	1.90719e+06
CTRL-023	CTRL	2.31114	17.514	2.70526e+06
CTRL-024	CTRL	2.83782	17.1138	2.00521e+06
CTRL-025	CTRL	2.37546	23.1016	3.53136e+06
CTRL-026	CTRL	2.95509	23.058	2.55866e+06
CTRL-027	CTRL	1.92238	12.0374	1.65688e+06
CTRL-028	CTRL	2.14375	6.65407	1.24894e+06
CTRL-029	CTRL	4.32176	15.1149	1.59614e+06
CTRL-030	CTRL	2.80722	16.2467	1.96509e+06
CTRL-031	CTRL	3.70302	17.8536	2.26308e+06
CTRL-032	CTRL	4.08015	9.38431	1.24209e+06
CTRL-033	CTRL	2.04362	14.9861	1.5133e+06
CTRL-034	CTRL	3.31113	13.2894	2.12549e+06
CTRL-035	CTRL	2.10278	9.56685	1.05165e+06
CTRL-036	CTRL	3.26439	10.9154	1.45757e+06
CTRL-037	CTRL	5.54143	14.2131	1.89488e+06
CTRL-038	CTRL	1.62072	13.2557	2.42154e+06
CTRL-039	CTRL	4.3094	8.16807	1.92087e+06
CTRL-040	CTRL	3.4034	22.7886	2.94526e+06
CTRL-041	CTRL	2.8042	10.166	1.39667e+06
CTRL-042	CTRL	1.84009	19.1524	2.66334e+06
CTRL-043	CTRL	4.122	12.274	1.39669e+06
CTRL-044	CTRL	5.22096	21.8665	3.04317e+06
CTRL-045	CTRL	2.17785	17.9162	1.84217e+06
CTRL-046	CTRL	1.66004	9.04907	1.39636e+06
CTRL-047	CTRL	3.55691	12.5118	1.44785e+06
THC-001	THC	1.63661	13.3379	2.01882e+06
THC-002	THC	6.72378	13.2653	1.48824e+06
THC-003	THC	2.88112	11.8364	2.23433e+06
THC-004	THC	2.57991	17.8036	1.47274e+06
THC-005	THC	2.78066	18.3329	2.95059e+06
THC-006	THC	4.9008	17.3544	2.32332e+06
THC-007	THC	3.28454	24.4465	3.07047e+06
THC-008	THC	4.48771	17.8878	2.14908e+06
THC-009	THC	3.97414	9.29817	1.53591e+06
THC-010	THC	6.68949	15.0034	3.3636e+06
THC-011	THC	2.7934	21.9216	3.32696e+06
THC-012	THC	2.54495	17.5565	1.58106e+06
THC-013	THC	4.95195	27.6977	4.27952e+06
THC-014	THC	4.25997	32.1652	3.77541e+06
THC-015	THC	2.11219	27.4803	1.70177e+06
THC-016	THC	7.18834	15.767	2.6107e+06
THC-017	THC	5.0438	26.5808	3.18638e+06
THC-018	THC	2.4041	21.9939	2.58486e+06
THC-019	THC	3.20247	20.6423	3.12974e+06
THC-020	THC	5.03472	26.0543	2.99817e+06
THC-021	THC	3.73433	23.6333	2.46933e+06
THC-022	THC	1.97359	11.8368	2.20205e+06
THC-023	THC	6.64905	20.253	2.04036e+06
THC-024	THC	2.8058	17.6423	1.63456e+06
THC-025	THC	3.73805	20.6196	1.9258e+06
THC-026	THC	1.85297	11.5207	1.57397e+06
THC-027	THC	2.71552	13.8834	1.66899e+06
THC-028	THC	6.40924	21.3146	2.40968e+06
THC-029	THC	3.51764	21.8541	4.07589e+06
THC-030	THC	2.00829	14.8587	2.12862e+06
THC-031	THC	5.96626	18.9457	2.67622e+06
THC-032	THC	2.05719	23.4495	3.32088e+06
THC-033	THC	4.04776	25.1687	3.41252e+06
THC-034	THC	4.51305	24.7431	2.30927e+06
THC-035	THC	2.83713	21.5441	2.20694e+06
THC-036	THC	5.92423	20.1104	2.97848e+06
THC-037	THC	2.28498	17.5279	1.95916e+06
THC-038	THC	3.44736	16.2136	2.38701e+06
THC-039	THC	2.74143	18.3534	1.83964e+06
THC-040	THC	3.02332	17.9469	2.10396e+06
THC-041	THC	2.18233	13.6755	1.30901e+06
THC-042	THC	3.13844	24.0033	3.32206e+06
THC-043	THC	5.10966	22.7036	2.3528e+06
THC-044	THC	2.09483	16.0928	1.9224e+06
THC-045	THC	2.82795	7.1963	1.08667e+06
THC-046	THC	4.26219	22.7438	2.07183e+06
THC-047	THC	2.85144	21.5387	2.23359e+06
