# Supplementary material for: Cannabis consumption is associated with altered steroid metabolism in young men
Source: Commun Med (Lond). 2026 Apr 16;6:224. doi: 10.1038/s43856-026-01469-x (PMC13087242; doi:10.1038/s43856-026-01469-x)
Supplement: Supplementary file 10 — Supplementary Data 7 [file 43856_2026_1469_MOESM10_ESM.xlsx]

## Sheet: SourceData-Fig3
Sample		THC-COOH (Serum)	OCCAS / CHRON	5B-dihydroprogesterone	11B-hydroxyprogesterone
		µg/L		Normalized peak area	Normalized peak area
CTRL-001	CTRL	0		59362	29475		* cells in red correspond to samples where the metabolites were absent or < LOD
CTRL-002	CTRL	0		59362	29475
CTRL-003	CTRL	0		59362	1.12946e+06
CTRL-004	CTRL	0		59362	29475
CTRL-005	CTRL	0		59362	259848
CTRL-006	CTRL	0		59362	1.49757e+06
CTRL-007	CTRL	0		59362	704868
CTRL-008	CTRL	0		59362	851457
CTRL-009	CTRL	0		59362	29475
CTRL-010	CTRL	0		59362	2.2699e+06
CTRL-011	CTRL	0		59362	726503
CTRL-012	CTRL	0		546652	444095
CTRL-013	CTRL	0		59362	444320
CTRL-014	CTRL	0		59362	6.64176e+06
CTRL-015	CTRL	0		59362	29475
CTRL-016	CTRL	0		59362	29475
CTRL-017	CTRL	0		59362	29475
CTRL-018	CTRL	0		59362	29475
CTRL-019	CTRL	0		59362	29475
CTRL-020	CTRL	0		59362	1.47384e+06
CTRL-021	CTRL	0		59362	2.52481e+06
CTRL-022	CTRL	0		59362	5.49046e+06
CTRL-023	CTRL	0		59362	29475
CTRL-024	CTRL	0		59362	29475
CTRL-025	CTRL	0		1.12493e+06	1.79407e+06
CTRL-026	CTRL	0		621210	29475
CTRL-027	CTRL	0		59362	989603
CTRL-028	CTRL	0		59362	2.54822e+06
CTRL-029	CTRL	0		59362	29475
CTRL-030	CTRL	0		59362	29475
CTRL-031	CTRL	0		59362	29475
CTRL-032	CTRL	0		59362	1.03192e+06
CTRL-033	CTRL	0		59362	1.10071e+06
CTRL-034	CTRL	0		59362	2.26905e+06
CTRL-035	CTRL	0		827070	29475
CTRL-036	CTRL	0		59362	29475
CTRL-037	CTRL	0		59362	843836
CTRL-038	CTRL	0		59362	696420
CTRL-039	CTRL	0		59362	29475
CTRL-040	CTRL	0		59362	29475
CTRL-041	CTRL	0		59362	663306
CTRL-042	CTRL	0		59362	29475
CTRL-043	CTRL	0		1.07587e+06	29475
CTRL-044	CTRL	0		914289	29475
CTRL-045	CTRL	0		59362	29475
CTRL-046	CTRL	0		59362	29475
CTRL-047	CTRL	0		59362	2.21542e+06
THC-001	THC	8.43	OCCAS	3.90561e+06	4.16162e+06
THC-002	THC	94.21	CHRON	9.38134e+06	4.83173e+06
THC-003	THC	23.67	OCCAS	1.04905e+07	2.45011e+06
THC-004	THC	18.79	OCCAS	5.70485e+06	1.99209e+06
THC-005	THC	14.5	OCCAS	5.2219e+06	4.70517e+06
THC-006	THC	21.68	OCCAS	4.48494e+06	2.40275e+06
THC-007	THC	112.22	CHRON	1.04469e+07	1.73382e+07
THC-008	THC	60.02	CHRON	9.4773e+06	1.91129e+06
THC-009	THC	36.04	OCCAS	7.80632e+06	6.12491e+06
THC-010	THC	151.4	CHRON	6.18804e+07	8.81416e+06
THC-011	THC	67.83	CHRON	1.61506e+07	4.00244e+06
THC-012	THC	31.23	OCCAS	6.11042e+06	2.74418e+07
THC-013	THC	10.92	OCCAS	3.96462e+06	1.02745e+06
THC-014	THC	20.81	OCCAS	1.78944e+06	2.95071e+06
THC-015	THC	91.32	CHRON	5.5224e+07	2.71557e+06
THC-016	THC	9.74	OCCAS	2.40041e+06	973192
THC-017	THC	110.11	CHRON	4.27119e+07	9.8016e+06
THC-018	THC	15.47	OCCAS	2.83568e+06	29475
THC-019	THC	10.3	OCCAS	2.58557e+06	439287
THC-020	THC	11.96	OCCAS	1.50283e+06	1.99252e+06
THC-021	THC	16.02	OCCAS	1.36952e+06	602091
THC-022	THC	9.67	OCCAS	1.36552e+06	1.52286e+06
THC-023	THC	107.78	CHRON	2.80308e+07	7.9011e+06
THC-024	THC	13.4	OCCAS	3.13699e+06	29475
THC-025	THC	8.57	OCCAS	1.96229e+06	1.30058e+07
THC-026	THC	8.67	OCCAS	345139	29475
THC-027	THC	26.15	OCCAS	1.72636e+06	4.61396e+06
THC-028	THC	101.36	CHRON	1.49895e+07	6.59326e+06
THC-029	THC	4.71	OCCAS	1.53497e+06	448946
THC-030	THC	53.36	CHRON	1.47492e+07	1.06898e+06
THC-031	THC	45.92	CHRON	1.11593e+07	5.79679e+06
THC-032	THC	16.02	OCCAS	1.80451e+06	824464
THC-033	THC	19.63	OCCAS	6.07513e+06	2.21932e+06
THC-034	THC	13.55	OCCAS	2.9719e+06	547332
THC-035	THC	33.64	OCCAS	3.60366e+06	1.14246e+07
THC-036	THC	41.17	CHRON	9.18042e+06	5.66206e+06
THC-037	THC	24.04	OCCAS	4.45548e+06	824130
THC-038	THC	8.28	OCCAS	2.05266e+06	695515
THC-039	THC	28.66	OCCAS	5.2842e+06	1.33168e+06
THC-040	THC	46.31	CHRON	7.0862e+06	1.0124e+06
THC-041	THC	15.34	OCCAS	1.49938e+06	29475
THC-042	THC	86.92	CHRON	1.56717e+07	1.76382e+07
THC-043	THC	38.22	OCCAS	7.77659e+06	2.91623e+06
THC-044	THC	6.99	OCCAS	2.16519e+06	2.22617e+06
THC-045	THC	10.15	OCCAS	3.60365e+06	29475
THC-046	THC	15.43	OCCAS	5.14361e+06	1.24347e+07
THC-047	THC	33.59	OCCAS	6.91681e+06	4.76724e+06
